# Supplementary material for: IS-SCP: enhanced single-cell proteomics using an in situ simplified strategy
Source: Royal Society of Chemistry journal article supplement (doi:10.1039/d5an00149h), 2025-01-01
Supplement: d5an00149h2.xlsx [file d5an00149h2.xlsx]

## Sheet: Sheet1
PG.ProteinGroups	HeLa Cell1	HeLa Cell2	HeLa Cell3	HeLa Cell4	HeLa Cell5	HeLa Cell6	HeLa Cell7	HeLa Cell8	HeLa Cell9	HeLa Cell10	A549 Cell1	A549 Cell2	A549 Cell3	A549 Cell4	A549 Cell5	A549 Cell6	A549 Cell7	A549 Cell8	A549 Cell9	A549 Cell10
A0A0B4J2D5;P0DPI2	7.20975	29.0801	10.8148	6.00564	5.6908	20.8937	19.0232	4.86697	14.5995	15.5415	7.67615	18.3052	8.1861	10.9617	10.1965	19.1745	7.14805	6.36993	11.6177	6.09965
A0AVT1	20.8131	10.5173	17.5047	11.8828	13.2343	8.83649	11.7546	15.194	6.30232	9.1031	8.68678	8.96795	7.98297	5.06449	9.21411	13.163	6.77272	5.51233	5.4871	6.31488
A0MZ66	20.1428	8.51567	10.374	10.093	5.69226	7.38881	13.1837	10.5381	4.86851	9.83853	12.6638	10.8354	10.0054	11.6926	14.3716	12.2438	14.5693	10.8167	12.0197	9.36814
A5YKK6	21.896	15.7134	9.74574	12.9174	11.7234	15.1183	12.8343	12.4742	10.96	12.7537	13.5718	13.6068	16.0709	11.7895	17.4804	14.849	12.1606	16.3228	13.6079	11.6082
A6NCE7;Q9GZQ8;Q9H492	16.4909	5.51769	70.4162	47.9668	47.4779	27.0059	28.6686	98.3699	57.4995	27.4606	13.4843	12.1998	16.1453	15.512	14.7859	19.4696	12.4102	28.4538	16.3311	10.2037
A6NDG6	31.15	56.5173	38.8228	34.6068	20.8936	22.6252	30.6147	29.4055	25.9501	18.6134	28.4706	31.3882	29.0212	17.7514	27.0743	21.9072	28.2704	17.7093	26.4946	24.8225
A8MWD9;P62308	40.1896	68.177	58.1227	45.3834	23.7257	29.6187	20.3327	15.937	21.1706	27.4825	30.6523	21.658	33.2757	36.5112	24.8341	22.2713	24.5056	16.8961	16.2198	39.5872
B5ME19;Q99613	55.2238	48.2759	60.3145	54.6457	59.5952	63.2763	66.6237	49.0725	49.0975	46.1222	71.6949	53.6364	63.846	61.1484	69.1884	75.0398	61.1949	87.679	76.7528	65.2726
E9PAV3;Q13765	32.4663	37.4108	36.7743	31.8955	59.6956	83.7905	67.3651	55.1012	76.1644	81.879	76.7054	62.5338	75.8746	86.1607	77.2582	70.8802	80.2298	101.003	76.6843	88.4894
O00116	19.9043	25.1988	21.7347	21.2379	33.7306	44.0442	24.1277	35.3218	33.6746	29.5124	28.5011	28.7268	35.3199	27.5516	21.6548	31.459	21.3992	22.3153	24.7409	23.8035
O00148	206.194	192.315	142.081	185.836	192.317	245.948	182.217	180.673	206.85	215.024	216.002	156.613	211.384	191.623	176.819	209.658	135.898	232.292	221.448	259.011
O00151	20.0885	29.6639	12.6503	18.7038	16.3137	21.2543	16.7593	27.7054	32.9475	32.6618	54.7543	63.6408	56.8959	41.5878	28.1076	37.6264	36.6964	51.7494	32.0794	38.3735
O00154	37.3018	34.1909	49.7191	50.8465	31.3591	30.5925	24.2497	52.6431	35.9035	53.1272	39.6516	47.6815	66.8318	45.6848	37.8052	46.1459	64.562	28.4813	40.6241	36.8409
O00159	29.7258	20.2169	20.6595	19.4048	27.1025	20.3997	15.2026	23.1371	17.9258	10.5662	20.0359	19.3701	11.0258	13.0207	15.7941	15.4273	15.4066	17.1308	23.6496	16.0724
O00161	23.0291	14.1324	9.37443	5.85478	11.2848	16.5212	12.0005	8.59296	9.19909	10.2263	17.7068	12.2272	16.5393	7.61946	12.8335	12.3159	8.97618	13.6634	10.9868	9.66046
O00170	41.2725	68.2162	32.1744	41.8404	28.5642	9.08634	14.72	23.8177	6.34936	5.11938	15.6088	16.5771	5.92421	7.74647	12.4596	12.5874	18.075	10.3556	17.7154	6.97948
O00203	20.0425	15.7598	22.7336	15.9224	19.8176	19.2995	25.9573	28.0191	26.4691	18.6329	18.0113	16.0438	19.1535	15.3155	17.8457	22.7689	20.9742	22.9005	18.4747	16.6148
O00231	64.9825	59.8447	99.0574	59.6902	77.508	75.254	74.45	64.9246	62.4051	92.4538	78.6657	72.317	75.2987	75.7758	73.5279	81.247	71.5654	79.2546	73.0717	79.1144
O00232	33.4087	30.6408	23.4466	24.3151	27.3839	34.2036	38.1385	37.7081	34.2577	36.2666	37.4966	31.7366	34.8992	38.3272	35.3097	40.3301	33.0568	29.6825	37.3247	32.5182
O00233	21.3873	32.0533	23.9289	20.3427	20.5366	17.0536	23.0258	22.8203	15.0239	23.4349	24.1434	19.1854	25.2561	22.9827	20.1457	15.9761	16.1528	22.3041	20.9785	27.4621
O00244	13.4894	22.8522	40.1943	18.6385	17.2741	18.3093	43.396	38.113	44.0391	36.8265	32.6878	37.0126	28.7344	24.9376	41.4423	27.7456	39.5225	20.9735	38.3636	24.0049
O00264	55.5888	41.2162	90.1149	64.1955	127.571	41.7012	34.438	54.5496	38.8575	71.575	66.8072	50.271	45.0614	56.37	43.0914	63.0824	25.3952	39.9842	46.6695	86.0104
O00267	15.2048	19.7106	16.0716	8.26716	13.8936	23.6418	26.862	21.0913	16.3205	24.9501	20.1528	14.6192	17.6114	16.8178	12.9274	21.562	16.013	14.974	17.9984	16.7319
O00273	26.018	21.4813	32.6562	24.7188	28.5652	15.0808	20.1805	18.0752	18.8108	13.5982	20.3168	28.4647	22.5278	15.7753	23.1199	21.0232	17.7232	20.5089	22.2226	22.4751
O00299	151.072	226.536	298.85	165.376	198.178	186.655	197.376	231.349	176.417	282.56	168.29	233.562	188.419	156.451	204.699	228.46	236.477	215.192	200.901	207.081
O00303	36.7104	38.8401	47.4721	37.1813	41.4932	30.8723	44.433	34.5613	31.7856	41.6078	43.93	42.6139	35.2964	54.4118	42.3563	51.9722	41.0627	49.2232	57.9993	48.4344
O00391	27.7793	23.9325	13.4712	20.9471	24.0993	16.7896	14.9415	5.9299	12.5547	12.9075	31.4535	49.1276	8.08278	14.1431	25.3562	54.9058	18.1645	9.60009	13.02	5.74117
O00410	75.1004	67.1367	80.2282	61.9868	68.9153	109.87	89.7474	93.226	122.349	124.998	64.3508	77.2718	48.6806	73.1877	68.6896	87.7747	61.381	82.0774	54.5132	67.657
O00425	32.1526	50.3345	41.6674	34.139	46.0024	20.3297	36.4124	22.5347	29.1105	26.8699	26.6342	18.1753	28.3656	23.0328	19.43	22.2038	22.9149	21.2668	25.1407	19.0166
O00429	33.6817	30.9751	47.0115	37.5526	37.7009	42.0641	48.2087	42.9675	43.554	50.8194	36.1647	34.314	39.6987	44.4453	45.2908	49.8234	32.8671	31.6553	36.5006	37.7806
O00461	9.51525	17.4282	9.66732	12.2988	6.46185	15.0412	26.7664	9.96914	11.2808	4.67362	10.5496	6.95165	10.1679	11.6943	6.19722	11.5526	4.7421	7.00625	8.35908	7.46263
O00469	9.79846	10.2621	17.2197	14.7448	30.1149	13.7555	15.5137	12.6186	16.2729	10.1998	17.8615	17.4448	22.1542	29.2985	16.766	19.256	11.1811	11.8993	18.7498	13.8312
O00487	39.0586	36.4667	53.419	36.306	32.9086	32.0732	39.4339	34.2553	49.9926	25.1393	39.2702	40.9796	40.6281	45.476	45.1223	44.5471	45.1883	45.9523	41.7004	43.64
O00499	14.5328	16.4797	13.3308	11.3364	20.7571	9.7471	7.08459	17.665	14.3479	14.8788	10.5889	10.8453	12.2438	10.9054	12.2603	16.9109	10.9138	14.8151	10.0248	12.0508
O00505	46.9049	49.9179	61.5018	55.4705	33.635	26.6622	27.0313	4.76246	22.9019	23.8341	32.036	19.2746	13.7242	16.6679	19.068	22.0604	27.4217	24.1592	18.5097	24.5086
O00541	40.6859	30.548	12.1911	19.6337	17.5462	63.2278	34.3036	58.4809	34.5955	21.3683	45.1346	26.4475	47.3642	34.3417	29.9362	36.6794	31.339	48.8905	39.9513	29.8285
O00567	48.3184	33.137	34.5939	30.9576	30.4605	43.4283	31.1761	35.1291	32.0634	37.7557	38.0831	32.3671	39.6896	38.2625	31.5108	32.9997	32.2328	46.6826	38.7841	46.8113
O00571	76.4864	84.904	58.432	65.8459	74.7461	82.2128	65.0469	87.7554	69.5236	60.9096	85.5512	63.0843	74.4703	69.5852	76.6131	88.6407	84.1717	100.802	100.257	83.7131
O00592	45.1186	86.1879	32.0412	44.6223	12.6985	32.6812	44.0323	75.8957	66.7488	99.628	21.6991	29.9985	10.7135	27.2615	17.4611	25.2205	13.3032	35.1705	22.5797	14.8124
O00625	22.7563	24.2869	36.3745	55.9467	35.0644	20.53	32.4075	32.0584	33.3896	29.0811	24.0961	38.0728	24.1481	16.823	27.5764	30.8005	26.098	22.297	21.7212	14.9169
O00629	8.01885	12.2132	40.7574	22.1292	27.7697	21.3098	26.4257	19.2516	30.645	20.0595	17.0856	19.6898	11.7861	8.71475	25.8048	8.72606	12.2409	14.3548	11.7139	11.6183
O00712;P08651;Q12857;Q14938	53.8046	42.6479	9.85655	22.8409	43.1072	53.9556	37.6759	34.8669	34.7076	32.6596	16.9078	16.1179	37.7847	32.2327	29.9895	17.3528	24.6779	28.6154	36.9288	27.9255
O00743	23.1433	39.2673	39.6902	23.5602	26.4431	7.65424	26.6018	14.6442	20.8102	13.0642	13.1823	16.7892	13.5018	8.81046	17.5079	9.41004	11.8417	6.77305	11.274	12.5299
O00762	9.95922	18.3264	17.7785	24.1378	19.7781	4.57414	41.9581	38.832	22.1286	8.7275	16.8849	15.7029	17.1299	22.9077	30.1347	19.5129	12.9437	19.8979	11.4512	4.7438
O00764	12.1866	33.6523	52.8127	27.2108	18.7258	30.5047	33.1577	25.4936	24.042	38.4395	26.3816	26.1098	15.6801	23.0621	14.6653	27.4506	26.144	20.2048	22.1978	18.3274
O14531	72.6265	55.8933	84.1306	66.4057	51.102	18.7707	28.7161	47.0267	25.9382	32.8215	42.7919	46.6087	75.1966	55.1485	54.4347	59.0895	95.4114	41.1627	41.9977	37.0026
O14562	24.9661	33.3332	29.5589	35.5306	24.6728	30.3095	23.8149	27.381	21.4588	16.084	14.7451	13.8244	18.3621	18.6877	14.4463	11.2272	14.3918	14.0154	19.4684	12.4171
O14579	43.083	27.2952	27.95	21.919	19.5401	36.7387	36.2272	19.1961	34.983	25.5271	31.5579	17.1472	17.7389	20.6114	18.309	15.1865	19.0828	18.2989	25.0364	13.9073
O14602;P47813	51.7185	76.7484	44.7068	64.337	90.0637	84.8558	53.6784	28.3682	88.8972	80.7744	38.1521	37.1877	80.3219	93.7946	79.6407	62.7586	88.4155	62.2343	82.4776	46.3336
O14617	13.0236	9.24098	9.35882	11.5523	8.40446	8.87348	11.0813	9.99823	7.2167	8.65415	10.7453	7.70034	10.7929	9.38522	11.0202	10.8256	11.6346	10.3951	12.262	8.4796
O14732	33.4352	19.1976	20.7288	53.0588	14.8552	29.1953	29.5698	19.9385	9.68406	17.9221	73.3728	71.3756	31.259	33.5688	68.9229	31.718	44.2301	34.1015	26.7025	24.8351
O14735	24.9073	6.93106	8.92792	12.5124	26.9812	23.0381	11.6512	20.6833	19.2049	13.9843	23.591	3.62229	11.8237	21.2005	13.3818	15.8731	7.15108	18.0254	15.2969	13.4579
O14737	29.3679	14.6461	29.8334	20.4948	34.2288	44.3052	20.6836	28.4897	34.1498	39.0002	21.5875	26.1981	20.2246	26.4307	20.8876	22.8567	13.6718	23.7434	24.4454	26.5429
O14744	46.828	50.411	52.0161	46.4765	44.3326	41.1822	53.0955	48.3657	36.3867	54.1196	78.9286	93.6009	75.6123	78.4324	73.6215	80.1381	69.4635	56.3892	70.76	87.5447
O14745	41.807	47.3083	63.3512	61.4535	45.0964	35.6092	66.0767	90.4217	63.9878	33.3942	29.3305	34.7447	36.8725	28.7912	40.2568	37.3339	38.6471	56.0954	41.8282	37.5417
O14776	30.4535	28.7756	19.121	25.7783	19.1362	30.7463	24.9043	22.6782	18.9406	18.2614	25.5991	21.0952	28.4723	22.7541	19.7677	23.802	16.9499	22.6129	27.5748	25.32
O14818	157.576	168.527	204.069	155.074	117.617	149.249	207.224	154.54	168.701	178.509	228.257	242.274	201.66	204.092	212.862	192.724	263.869	155.864	172.658	184.911
O14828	10.4013	13.9713	16.3858	12.0783	15.8926	10.9482	8.23536	9.91509	9.29323	5.86821	13.2462	13.6253	11.0107	13.6194	11.9012	19.8398	9.43175	17.3309	12.1613	17.5639
O14907	13.7055	12.7539	31.0075	21.7853	15.048	5.47846	16.3163	2.9241	8.48523	9.04287	10.1708	9.07928	6.50948	2.626	6.73827	6.06384	2.19948	4.79394	8.85808	5.58059
O14908	30.3344	14.4924	18.4931	15.7745	16.9309	28.0061	26.2603	28.7763	26.4956	15.5216	31.4278	19.4392	10.521	21.1486	14.6171	17.6742	20.0517	14.5133	12.254	12.5382
O14929	9.95522	10.7944	16.0021	5.74989	3.42028	3.45679	9.37945	4.5449	4.69474	10.9447	6.26995	9.22118	13.8755	6.62538	8.12235	7.72895	7.94969	5.17703	7.45907	5.13311
O14950;P19105	98.3346	150.716	171.6	153.668	181.973	177.543	169.355	241.004	180.302	84.0213	71.385	69.6497	63.8333	61.935	70.4778	85.4092	60.6403	58.0743	65.4969	71.6253
O14964	30.6759	25.4034	28.1555	27.0216	25.6797	12.8083	16.0157	20.0388	11.7961	23.3104	14.3414	16.3457	10.6557	13.0626	16.4979	18.6372	5.27715	8.75867	15.7608	13.9819
O14974	23.4258	36.4866	29.497	20.6856	27.2655	23.1179	17.2306	29.1849	20.08	16.0714	28.7012	21.1369	23.4729	15.7741	24.2047	24.0344	19.8067	18.4613	15.257	16.4586
O14979	92.3907	145.944	87.551	85.6832	48.1872	60.8032	77.2602	103.2	97.026	83.7089	56.743	48.0085	52.9809	42.7331	39.9397	70.8659	45.1798	52.057	59.7111	47.2998
O14980	50.7231	69.2084	68.7031	63.896	58.3065	60.2762	65.0357	66.0215	62.1712	54.1338	70.616	58.2526	81.4719	62.3321	64.2073	66.7289	62.2969	68.8875	72.0196	71.5652
O15027	25.9491	24.2228	21.26	19.8572	13.1146	17.6064	23.9373	16.2214	18.886	13.9968	23.1974	20.0957	19.3585	10.8579	16.3137	21.349	21.2445	10.0924	18.3701	13.4687
O15031	6.47573	3.88788	5.49405	4.0153	2.08489	14.8705	7.6199	9.44163	7.81009	8.38027	4.41982	3.21338	6.52357	4.97756	3.24994	20.488	7.39382	6.01839	5.64338	3.54261
O15042	26.7296	14.4671	8.56656	16.9302	13.2322	19.3242	14.8864	11.8659	17.4187	11.906	15.7463	9.86758	10.2244	12.3731	13.8883	10.2801	9.4423	16.0305	13.4338	11.7221
O15067	59.6593	78.118	81.9771	43.469	42.7157	45.5008	90.8269	52.273	59.6177	76.02	59.8397	75.6087	48.6943	56.3221	56.808	69.0512	79.9852	54.1066	54.4029	63.9228
O15126	9.0499	12.4312	11.7963	2.87534	6.27561	10.2632	13.5578	10.4579	6.3976	8.98533	12.7893	8.01003	8.3931	8.45995	6.48234	6.00012	9.42225	3.74769	7.43322	7.43564
O15143	47.4953	50.686	67.7437	53.388	63.6487	20.4774	23.7174	49.5446	37.1432	37.7451	24.6488	17.7814	35.7983	19.2345	23.2292	26.9883	22.0792	20.6201	27.6059	28.7349
O15144	88.1053	43.2364	97.8285	53.9259	83.719	44.5983	39.9757	70.9016	48.9076	68.5222	52.1992	42.5759	61.4007	49.0834	51.0956	52.3672	62.6996	53.6867	53.6782	46.6681
O15145	81.0172	63.3097	131.536	66.2499	124.191	42.4788	37.9424	74.8079	73.9024	74.2996	44.872	33.0873	57.0391	49.37	46.77	42.4925	48.2848	50.4035	49.0798	43.7995
O15160	66.8669	20.579	19.6264	22.3099	20.1536	26.1504	39.5201	25.9433	23.4292	28.6418	34.3343	34.0288	26.7562	24.7773	29.8905	32.1025	28.7244	31.5405	27.8413	37.9918
O15173	38.3424	29.1685	66.1353	50.3949	70.0883	62.2635	45.1261	84.1343	41.2033	40.2942	22.5797	19.9119	27.3532	26.0836	18.2344	34.2305	15.1504	26.1338	26.1167	21.885
O15212	90.8955	44.401	82.6891	53.7812	62.5922	30.3911	37.225	39.4433	26.4501	39.712	36.0747	30.5263	29.3322	25.5931	37.6986	48.5018	32.5567	35.4655	42.9438	42.7824
O15258	37.768	37.6816	20.8878	18.3753	28.2262	28.9686	19.1401	32.4086	29.0132	34.9291	28.9589	13.3238	27.6909	19.4852	18.5035	17.7675	21.0762	14.2815	20.6498	25.7231
O15260	34.5579	19.7695	20.8477	17.4607	44.3677	41.5645	30.015	48.6515	32.0337	26.4718	35.0576	23.7069	22.0433	34.6873	22.2294	36.2153	14.3619	24.9292	31.3356	30.9555
O15294	31.5268	11.6314	18.262	14.2945	14.199	13.8616	12.399	17.4191	13.3679	15.9188	14.92	15.1597	10.5034	13.6415	11.6776	14.9048	12.1615	9.73535	9.40138	11.6241
O15305	31.7798	41.4674	42.7035	36.6563	33.5278	24.3465	34.9905	21.6661	22.1832	31.7245	25.1551	36.7418	22.1902	28.4546	27.2885	28.1839	20.2516	32.1717	31.1363	28.0599
O15347	76.1354	38.5228	55.4875	73.7659	61.2548	66.2596	46.6903	59.2913	39.8292	58.2188	47.0135	28.7575	40.3912	48.0837	46.9381	39.8479	57.2139	47.5949	55.3822	58.5587
O15355	40.4608	22.8101	44.4195	36.7527	28.3064	46.1622	48.3879	23.9592	40.6402	26.3296	26.1202	36.5447	36.4134	24.2516	30.293	35.0676	30.0885	41.9477	27.4429	40.2705
O15357	22.7609	31.0938	17.964	19.648	21.4394	13.8704	19.9231	13.376	15.1587	11.2836	9.5887	9.54294	7.80568	7.47441	10.5448	14.3323	9.58016	6.1112	11.4341	8.89754
O15371	32.0501	37.2602	40.3334	39.578	58.0334	45.3683	58.1064	29.4352	40.9312	48.7029	34.5708	31.2656	37.985	39.1303	43.6398	44.2939	42.9794	54.0908	42.0445	47.3925
O15372	33.4728	48.8058	48.2519	36.9172	40.4724	34.8681	29.5196	34.7741	31.9071	29.448	34.9508	32.3696	38.3167	45.2086	45.8582	41.6422	43.5806	45.2784	41.3967	43.7605
O15397	15.236	26.5518	14.2083	10.4292	14.73	19.152	22.5932	19.3659	14.0431	15.9974	11.5927	12.8949	12.4304	12.3029	11.0231	12.7321	11.1975	11.2015	13.613	7.81742
O15400	20.6814	5.21497	17.3691	5.44526	7.2975	9.38981	7.34325	18.423	5.4879	13.3265	8.00773	4.78795	3.49977	8.44691	5.55045	7.15618	3.36387	4.20851	6.79931	4.22563
O15427	112.714	50.6143	32.528	33.203	55.3767	113.622	82.5066	98.1227	94.0382	78.5836	68.5741	35.6049	47.85	52.8214	49.5228	52.0626	46.6227	53.222	59.416	64.42
O15460	20.8441	13.4892	23.8723	14.3582	23.3038	15.9293	18.8534	19.7486	24.9025	24.6949	17.5739	20.5802	17.8458	17.0072	10.4214	13.868	11.5113	17.0462	9.89567	10.0301
O15498	9.92309	11.8249	9.94385	16.1328	15.6245	10.0441	14.5607	8.63196	13.0314	7.87143	12.2637	11.6285	10.4842	7.62764	9.50867	11.9837	13.7265	12.3972	13.7309	8.23784
O15511	74.4749	71.4381	110.119	81.2224	113.517	55.3185	32.0263	74.1159	50.0523	55.8448	32.6982	40.0353	59.9994	52.0397	49.6411	43.9524	54.9929	42.6686	47.4667	43.2282
O43143	75.2707	72.8635	43.5355	54.8045	55.2412	70.4002	46.1095	57.0079	49.749	55.4967	47.3406	38.8633	44.6395	44.4912	36.0416	29.2694	41.6677	33.3808	48.0962	51.8706
O43148	16.0407	7.4307	4.4173	7.99648	4.67468	13.2712	11.7588	6.10043	9.98372	10.2662	9.46974	8.89242	7.27319	6.97259	8.55966	9.6951	6.80038	8.87431	9.33984	8.65515
O43169	25.9188	14.528	7.7121	17.0961	20.8161	37.6069	35.7612	38.7182	24.4246	24.6857	74.5943	81.7837	55.413	70.581	63.7869	47.0785	90.6693	80.1289	53.6507	66.6674
O43172	17.0108	12.9623	11.6712	13.523	11.4102	19.3229	14.023	17.0907	17.0765	15.1095	15.1994	17.9271	17.7842	17.0186	11.7651	16.2662	12.8466	19.5796	14.1297	20.3088
O43175	275.633	292.729	211.801	302.585	157.56	125.098	190.885	201.428	106.939	208.021	128.626	186.319	330.679	145.396	228.428	218.251	216.619	187.123	167.567	128.563
O43237	5.83497	7.60943	20.012	18.3266	12.1798	20.7159	19.5276	14.3453	17.5605	14.1426	16.3292	17.9784	19.5775	16.8459	13.7008	20.1229	12.5728	20.9442	11.6156	16.1953
O43242	55.6001	57.2182	76.5189	60.4145	69.0399	50.5229	49.1537	54.5604	46.6067	66.3523	54.1018	55.1976	57.6183	59.9019	55.7237	60.1074	47.2407	54.2543	58.8285	64.7002
O43252	28.4192	40.53	18.815	25.9076	19.4083	11.2309	18.5525	23.3982	19.3331	20.2698	12.1832	19.6715	16.0449	12.9723	12.2774	13.7952	13.237	12.6293	13.0139	10.0844
O43290	15.9654	16.1196	12.4977	17.2868	11.6224	13.7616	11.6791	20.6916	10.4974	12.7143	11.586	13.5592	11.481	14.5141	9.92202	11.8499	11.5702	12.6189	12.0387	10.8803
O43324	29.5742	25.1263	27.0116	37.1848	33.4876	20.8228	25.3831	37.6961	35.3367	44.7723	31.6462	22.309	39.8004	34.8087	38.5366	38.756	34.3536	44.283	34.8281	34.7341
O43390	366.31	357.99	262.659	299.268	239.714	413.432	332.095	335.34	318.6	366.511	259.775	222.823	292.089	246.895	226.926	264.001	235.007	243.368	272.558	277.987
O43396	40.1842	54.16	65.107	47.65	43.8602	50.4291	51.2172	59.4039	52.7195	69.1206	43.3367	51.8739	52.9539	45.5781	43.0169	47.4173	36.0052	38.7889	40.1061	46.1366
O43399	63.9943	144.786	143.15	107.229	153.623	52.5836	78.9022	68.5682	55.0212	115.457	95.0303	98.1458	72.2869	74.1724	83.3017	122.85	67.2606	112.181	86.7782	90.7994
O43447	39.9964	34.51	53.1734	28.5016	37.4733	27.6338	28.6826	43.5838	27.3348	53.2644	33.3943	33.7758	42.9446	34.838	24.5996	40.5421	38.7581	31.2676	33.4774	41.6608
O43464	11.482	6.62544	5.89114	7.0626	5.71445	10.953	9.45659	10.0665	6.2914	3.93725	11.1372	7.07972	12.9992	8.72705	11.619	5.76905	11.7524	9.5487	6.20372	4.59982
O43488	23.6232	14.6652	23.0652	26.8638	15.9312	10.7493	10.4301	7.03178	12.3136	10.2883	26.7169	21.4371	20.4804	18.6259	21.1798	24.2593	17.6632	14.5999	24.1914	20.9098
O43491	45.7458	48.2653	30.6104	29.3869	44.3957	37.8041	32.2423	21.9796	24.1475	30.6113	33.1919	47.4469	44.9339	25.6521	33.4591	40.7648	31.7628	20.2213	42.1861	24.2849
O43583	16.5161	32.4899	31.0392	17.6677	31.618	19.4662	22.3257	32.349	24.6437	23.7494	9.56417	12.9127	16.2019	13.7611	7.1572	4.94089	14.0169	10.362	10.1818	10.3547
O43592	19.8365	26.1643	20.8662	16.0551	14.9663	19.7634	18.8954	19.7982	19.1566	15.874	19.4575	21.3802	17.6868	14.2675	19.3423	15.3368	18.9798	18.5685	12.2484	19.4464
O43615	17.6177	20.9307	10.8509	18.9501	18.6163	23.4964	18.8867	17.5634	13.8472	13.1377	22.379	20.9839	14.0526	18.942	17.9252	14.7097	12.5434	22.1191	18.6719	18.504
O43617	19.7895	14.2187	28.5127	18.2614	21.3437	11.8221	26.6884	27.9105	15.556	22.398	19.3523	18.1845	21.0694	24.218	21.7471	27.9945	27.3711	19.8426	25.0038	25.0621
O43633	18.9381	15.835	19.1565	11.1493	17.3376	14.8475	14.6646	16.2628	16.5752	10.5337	15.5337	15.8981	7.96224	12.4134	12.6749	14.2756	11.8168	14.9403	16.4085	14.6186
O43670	30.0827	29.5928	7.82883	22.6252	23.7376	69.9127	24.0934	51.947	63.9703	42.5522	32.7446	32.3777	47.7592	49.6095	33.6372	29.3799	32.9864	35.5073	44.9121	48.6622
O43681	39.1647	58.0856	38.6945	36.8633	37.6624	39.2653	50.3108	32.4441	38.5297	37.638	24.3032	35.5436	27.2634	29.4141	34.8847	29.8856	30.0053	32.5626	33.0971	26.8486
O43684	69.1677	79.2256	54.5526	65.763	58.691	70.3242	60.5014	73.8832	65.5506	73.4127	49.5178	46.2564	49.9596	58.7005	45.8388	37.9679	44.7629	47.9576	49.9568	47.4378
O43707	295.76	213.75	306.085	379.395	472.931	349.451	180.506	419.351	238.085	235.11	115.127	111.365	76.0291	126.823	95.9823	90.5555	84.4497	94.5568	106.877	99.5996
O43747	39.1402	30.1282	22.4642	24.5262	19.9537	32.8043	28.2194	35.3947	35.3048	29.4773	31.9301	41.5838	30.2804	32.777	37.9052	28.3923	26.7983	45.7641	36.8083	27.3464
O43760	83.249	85.5551	35.1589	66.3158	39.694	35.3629	15.5671	15.0139	29.1088	22.3585	174.209	188.133	78.0046	50.5373	98.0384	126.17	86.0159	113.044	111.402	109.377
O43765	19.3819	17.6512	18.7729	17.8441	16.5333	19.1634	25.1171	27.9785	20.3309	30.2916	17.8783	24.5063	14.3827	21.0542	21.2121	22.3873	19.9619	21.3167	23.6634	17.7536
O43768	42.8701	35.7525	26.6605	24.6262	30.3353	48.4223	31.2731	24.793	24.0216	36.6248	28.1809	21.1041	26.5161	19.0927	25.6366	21.9136	34.568	26.5965	25.2585	24.3638
O43776	66.1789	67.8184	59.0129	66.8606	50.8014	61.375	71.1696	83.4546	58.8305	75.2449	41.2211	35.227	64.8172	51.4699	49.948	50.9904	42.7846	62.0805	60.5621	65.4818
O43790;Q14533	331.445	448.147	267.643	5505.7	149.012	376.86	2556.53	97.0562	172.963	823.809	144.663	222.111	32.3798	45.4463	410.757	54.0602	62.2361	57.252	133.096	65.9463
O43795	33.3623	15.0734	19.2944	14.3379	27.9208	22.2747	11.2051	18.1218	17.4164	17.3298	30.2776	10.5713	21.8345	14.1957	21.9249	16.9388	16.194	14.2547	17.702	19.5807
O43809	52.8935	56.4736	40.3254	38.2823	35.7231	43.8511	23.2691	35.9032	42.616	32.8427	39.7481	26.1346	36.9129	46.3979	37.9974	29.3535	31.8697	46.2421	42.1517	40.5511
O43813	75.5369	172.417	61.0755	45.7671	45.0415	42.0583	64.7003	55.8702	69.292	41.8263	62.5626	51.4279	61.4133	46.9226	54.3657	50.432	66.5918	49.6443	61.2246	49.0005
O43818	19.354	15.4069	12.071	14.8683	14.5583	13.6446	13.1079	16.2388	12.009	18.6988	32.3915	23.0163	22.5823	28.2812	26.4337	12.4364	16.6568	20.6739	19.8908	29.7451
O43837	8.95008	17.5005	16.8816	16.023	10.1079	17.9903	13.4176	9.79797	16.1392	11.627	14.2895	19.1086	15.5901	12.0853	16.9783	6.84099	14.0438	13.0917	12.2288	16.4941
O43847	21.4334	11.4505	23.8358	15.2443	14.2245	10.7992	26.7188	20.9101	19.8746	16.4697	21.8008	29.3694	27.7914	16.5618	20.2074	22.8485	28.0924	15.8415	21.3383	18.5537
O43852	119.98	130.551	104.197	82.6986	98.0649	136.241	126.425	117.956	150.505	87.949	71.5748	86.1185	54.0257	92.1776	57.8326	56.4916	42.5189	66.8148	77.1605	56.1696
O43865	34.6685	33.7969	53.8766	30.9885	32.8552	11.0127	22.396	24.9793	21.9788	28.9724	34.1427	21.8674	29.6849	19.8034	34.8424	32.6302	35.4475	18.4271	20.5134	22.317
O60231	15.2168	5.0951	6.84803	7.99242	7.40052	11.7671	5.53437	15.3269	12.1167	7.87121	7.61388	6.51021	7.00928	7.01069	4.87129	8.20292	9.4116	8.15197	11.1482	10.7062
O60232	17.4017	31.5976	28.8268	22.8392	27.6147	28.2376	22.8928	37.5589	43.4351	47.5516	25.2565	27.7273	29.6781	32.7679	34.2808	26.4618	28.6357	16.6969	26.5081	26.1747
O60256	14.2492	11.9322	35.4728	15.3047	5.88804	13.1317	14.6866	5.25446	9.07187	15.0814	15.688	17.2753	14.3856	11.3853	13.339	11.4841	10.7479	8.2806	13.7465	12.5585
O60264	47.9906	39.2311	36.508	36.9833	43.6585	45.3376	39.6807	40.6709	41.2584	36.2022	40.5644	29.3087	40.4306	40.274	32.693	29.9721	30.273	38.1731	38.1454	36.2849
O60306	24.2994	10.9636	14.1009	12.1503	9.79838	19.1063	18.2926	14.3475	15.8375	17.5359	11.4936	10.9539	14.4489	13.2307	10.1437	12.857	11.9725	16.5599	12.0726	12.6343
O60341	10.3362	7.46609	5.04854	4.83273	4.01567	16.4589	9.53132	4.02971	4.78972	6.64966	6.58311	4.34638	7.76935	7.14094	6.7739	5.46595	7.19655	5.80354	5.7735	5.39018
O60488	24.5825	12.8878	14.9169	10.5015	23.8196	18.2593	7.24743	16.4898	11.4409	16.3489	18.6416	15	17.4297	13.0888	15.6025	14.862	14.0146	11.2474	18.9619	11.991
O60493	23.0259	17.6935	32.4622	30.5201	44.3369	34.285	24.6224	42.2067	19.3145	21.0051	20.7913	20.6715	24.5959	20.0287	17.5331	23.5566	15.5459	27.1016	22.969	20.423
O60502	18.8874	13.5937	17.8123	25.2125	26.4876	16.3184	20.4984	34.8915	20.1956	30.8792	32.1011	30.6573	29.1465	23.9834	18.265	26.8798	29.5618	22.4516	23.208	18.0283
O60506	112.834	76.919	75.6797	63.2135	78.8174	134.86	114.361	115.502	105.464	121.308	93.4656	86.2034	113.334	100.595	98.3091	103.279	116.445	117.728	109.622	124.793
O60524	3.21762	10.7525	7.23533	9.95235	9.74979	5.86801	10.3992	6.2505	9.85742	7.85272	12.9226	7.68075	12.6496	7.46452	13.123	12.152	11.1412	9.03038	9.81367	11.3298
O60547	13.9748	13.6607	13.8001	7.21658	9.8433	14.7767	15.2905	11.244	13.9552	17.5169	20.1059	23.5738	14.3848	17.7771	23.7548	20.0531	20.0391	12.377	15.1755	18.1196
O60568	47.074	24.5033	44.4652	26.6686	53.9614	34.4887	34.9202	27.3729	35.2976	15.2806	30.5754	31.3903	21.5459	32.3337	27.2723	25.4244	21.5966	29.6176	26.5823	27.3451
O60610	14.5031	14.0726	18.6322	20.235	15.9335	13.3219	15.0317	16.8125	17.2324	14.4588	13.9354	12.3914	15.3405	15.1639	13.5342	14.8177	15.5862	15.3459	11.9727	9.17389
O60664	16.8727	17.5548	33.0532	22.1516	22.6893	18.662	25.1849	24.2659	23.6642	28.6212	24.2837	18.4974	19.0839	19.0953	22.6802	26.7095	24.981	16.1837	19.1927	19.7496
O60684	31.7998	23.7644	14.5023	23.6981	25.2342	8.80962	17.1938	7.81917	8.44833	13.6089	9.35614	20.2531	11.4174	14.0503	11.6693	11.21	14.2188	11.035	16.9616	11.4565
O60701	61.0085	66.5453	119.208	138.592	121.163	73.7775	99.753	126.421	69.0787	134.259	48.9798	46.7055	48.8036	42.9926	56.7146	39.2778	44.7899	24.4131	46.5602	27.3485
O60716	27.9216	19.2096	14.2871	18.1688	23.1209	22.785	11.4325	23.1046	18.896	20.8805	23.3611	20.686	17.5776	13.8607	22.0148	19.219	22.018	17.6664	17.5201	14.4757
O60749	28.5273	32.925	33.5009	34.584	29.3947	12.0394	23.2084	12.9278	16.7079	16.6466	23.576	21.4819	29.6561	21.8374	26.0432	22.8893	20.92	22.6886	23.5982	24.3917
O60762	35.3801	6.03148	23.8683	22.6054	19.5442	19.3236	18.0334	18.0759	12.3274	17.4903	15.3461	14.3961	12.6752	12.69	12.1268	17.7389	11.7454	17.5993	13.4625	16.1505
O60763	12.7123	15.0694	19.3347	15.3937	19.9765	20.8116	16.4883	11.6196	22.1694	9.89624	11.8228	11.343	14.3411	16.4767	15.9727	19.4359	13.552	11.0823	14.5717	12.2431
O60814;P57053;P58876;P62807;Q5QNW6;Q93079;Q99877;Q99879;Q99880	695.912	112.945	234.891	602.16	347.912	312.576	88.7184	321.228	132.477	132.74	141.627	137.261	194.816	134.097	95.1084	13.0878	352.791	224.899	284.198	196.047
O60828	20.0571	49.8947	27.026	38.5139	46.7778	55.5336	33.9991	61.2903	54.7351	65.1494	31.7064	38.863	50.6466	38.0727	33.4959	32.3882	37.8965	43.2943	38.7273	48.7407
O60831	20.3998	33.3501	29.0744	11.2508	22.2331	18.9799	30.482	62.8066	24.9531	19.7128	22.9312	16.6194	22.4677	34.7043	21.2823	31.034	12.6368	17.2254	24.3553	17.7465
O60832	19.4006	17.5562	18.8845	16.5936	19.514	32.9236	25.7601	25.4203	20.9937	23.8115	22.2819	19.3781	20.3611	18.7827	14.7092	19.4684	26.7855	20.9692	21.6546	26.5804
O60841	29.0555	21.5525	24.7311	43.3474	17.6126	37.064	32.4239	26.9848	33.0012	28.8644	28.7526	33.4902	48.8589	40.5711	42.3768	41.9596	55.2002	54.9916	47.5632	40.8558
O60869	72.0672	50.7501	48.731	41.9549	63.2024	59.6001	38.6444	70.0434	55.7044	37.4738	46.1639	33.7733	45.9026	45.7777	47.4666	31.1046	40.5177	47.5306	37.8095	43.0442
O60884	17.1037	16.0303	16.9355	18.6727	20.6602	22.9938	23.6344	24.2899	19.8857	32.6718	28.8001	19.5145	26.3195	26.6071	29.5691	35.5042	20.1614	35.5457	26.6904	30.3325
O60888	32.949	46.2545	110.691	102.418	102.654	33.5453	72.8668	65.9477	146.753	147.097	83.0376	99.2651	60.9752	90.7156	65.794	86.4384	104.315	65.8021	55.8498	59.5434
O60925	34.9307	53.6872	50.752	34.1791	47.7586	28.0258	45.2106	39.3655	47.8646	51.1754	25.2985	31.7976	28.3074	26.3451	35.3378	18.2263	24.3673	25.5383	24.0587	26.5372
O75083	174.271	199.829	538.027	246.301	387.229	179.953	212.201	305.428	233.261	218.7	119.699	142.884	103.189	116.654	134.643	152.207	120.318	65.5948	103.925	99.8215
O75116	13.7627	15.0925	15.4244	17.9333	14.4847	13.2138	15.176	12.7404	16.4436	10.7972	8.4742	8.78243	11.853	10.6119	11.2508	12.3284	12.9103	14.1976	8.44837	9.13884
O75131	31.4926	22.4238	18.3127	40.0751	18.5587	56.4583	50.5394	33.5511	46.1338	39.0478	33.7405	42.7325	25.4246	28.5639	38.764	21.9803	27.3127	25.7176	23.1748	23.7349
O75150	8.23089	5.74099	6.33788	10.5579	5.03163	5.88382	6.57954	13.4316	7.00558	7.1613	3.531	4.5354	4.54	5.2029	8.81682	5.11896	6.5177	7.1965	5.40535	4.74252
O75152	13.5166	18.0156	9.22531	6.28175	10.1728	10.2212	7.63511	13.0784	1.68976	12.7877	9.7536	13.3471	11.6388	5.73235	6.93299	8.38606	8.9531	7.75891	9.61472	7.41827
O75153	12.4935	16.6956	14.7734	11.9647	12.2819	15.9523	24.1942	20.0553	23.2508	17.4032	18.2766	15.2361	12.2089	12.769	19.2341	17.8901	15.2972	18.8502	18.5829	14.745
O75223	260.515	75.3303	103.154	139.591	51.2392	47.9028	76.8593	47.9387	44.6623	42.7897	140.752	933.498	93.8084	182.712	142.724	82.8085	225.853	121.193	102.816	69.4077
O75340	81.7822	91.197	78.8214	70.8672	85.0227	111.936	89.3014	88.0296	101.572	80.7998	44.1196	32.8977	51.9728	41.4547	49.2643	36.2011	58.2279	45.7164	33.5662	40.7156
O75347	46.3208	70.7621	129.614	93.3349	95.7267	55.5568	87.8906	86.7803	85.7485	72.077	49.5644	52.2713	65.6467	54.719	55.4388	57.8428	58.6685	57.0904	55.1151	50.4888
O75348	13.0091	27.6105	15.9823	27.0895	17.1448	20.0951	21.7151	45.8274	22.1603	16.1772	20.1538	17.1529	19.8206	18.985	20.9747	20.9354	15.2182	19.4493	15.6901	18.0975
O75351	26.7353	66.2652	42.8132	43.0183	31.7731	27.9119	36.1451	49.6342	43.7284	35.1938	40.5821	24.961	32.0543	32.8738	38.5447	30.9326	22.3366	25.8519	31.8751	25.5856
O75367	84.6541	113.947	44.8595	92.1911	58.391	136.541	88.4448	135.934	86.0717	64.2649	66.357	62.9558	86.6044	75.9193	61.2284	13.2929	98.0218	78.3768	72.1378	81.5449
O75368	50.8088	42.4243	42.2443	35.3459	33.2569	15.3211	26.0823	23.4024	12.7385	24.8456	19.2885	27.2835	21.4959	15.7809	19.1596	25.706	26.1816	19.1118	13.262	14.9694
O75369	247.409	242.519	235.897	253.386	387.507	270.039	228.664	780.73	287.725	504.589	146.869	118.056	119.813	152.801	113.491	92.0584	141.696	118.142	113.266	95.9514
O75390	129.704	139.761	161.311	129.018	98.3579	103.07	66.5605	95.2358	107.026	99.3812	111.771	130.624	92.8182	87.5428	117.3	81.3416	96.4141	127.035	119.275	128.215
O75391	11.2531	8.95487	8.56001	10.517	6.97319	16.5611	11.8572	12.6649	9.48611	6.8328	10.6367	3.34335	5.1321	14.959	13.7358	9.69017	6.01934	5.38458	6.31358	7.76465
O75396	72.4017	60.492	63.3498	51.145	77.0767	39.6435	40.4337	51.767	35.0612	33.6841	43.9706	53.0783	58.6179	42.8034	33.5683	46.7902	44.1497	36.6872	52.6402	45.5898
O75400	18.8494	18.6374	7.47461	9.81528	8.40306	15.9828	10.1315	15.3854	15.4549	12.0946	16.4208	13.1944	13.8997	10.2736	9.13287	8.89589	8.7979	13.6021	13.7924	13.668
O75436	37.3985	33.4905	40.4016	31.054	21.4534	33.4216	29.9088	24.9151	22.6618	25.2677	51.3753	50.3041	42.3735	41.7651	43.8413	42.6463	44.1722	58.6013	38.3705	42.5737
O75438	22.4603	12.3779	13.3683	12.016	18.0094	29.6433	17.6044	19.4527	17.6428	5.82754	21.995	20.1119	14.9625	24.8596	21.4341	19.0566	12.8046	17.8819	21.5059	26.0961
O75439	54.5191	63.1593	31.8642	39.3586	36.6487	35.5528	37.9855	30.7121	39.7485	28.9527	38.4713	41.808	27.9909	34.6799	42.8076	31.767	44.3536	33.0443	37.7141	37.065
O75475	48.6284	39.9311	20.8531	25.8969	15.9536	41.2474	32.0103	24.8998	28.4344	21.6439	19.5325	15.6844	25.0606	26.3047	19.2164	9.8324	13.6398	17.605	20.0065	16.7365
O75489	33.3476	13.485	16.0752	22.1815	25.0248	26.8394	7.595	14.2542	10.8516	3.7618	23.1521	15.4788	14.6871	23.229	17.5329	23.2299	20.4866	18.7573	21.2617	25.0045
O75494	17.538	13.2192	15.8212	11.3033	15.1031	20.6177	13.3514	13.2393	18.8768	10.6213	14.0956	7.76789	14.433	13.1792	12.0087	11.8696	7.0605	13.3908	15.606	12.7943
O75521	15.7794	18.5381	15.5487	13.6973	9.21886	6.19565	2.45411	6.94697	3.86338	5.30901	14.4293	8.92931	6.27487	7.69482	9.54167	8.23097	12.0869	9.36912	12.8621	13.5807
O75533	68.8023	60.7694	44.8107	48.6998	46.9062	77.6067	50.1943	51.8049	52.9027	55.5475	67.5559	50.0832	58.9601	54.602	46.093	51.6761	49.1389	64.3604	59.0542	65.8502
O75534	27.0475	21.1142	36.4193	36.2043	29.8251	38.271	48.7295	46.5037	35.4108	35.1403	45.3608	46.7605	43.5044	47.9736	49.6669	53.7394	49.7506	55.6537	50.1359	51.0735
O75608	60.8402	87.6634	56.2084	62.7591	35.7509	46.6812	83.5874	60.2523	50.2366	43.795	116.02	72.8462	25.8551	43.5218	87.317	28.1272	87.0809	50.2411	24.891	26.0369
O75643	67.2753	52.3636	51.3532	62.5689	48.6402	71.3172	63.4993	63.2979	63.3683	63.4821	60.5714	57.3866	68.4768	60.5252	48.0825	62.6815	49.6	74.0845	59.6894	54.9556
O75694	26.5804	24.0037	25.877	27.2623	29.0204	35.9589	29.8435	32.0951	31.0336	30.1414	26.7685	18.4975	26.8241	30.719	25.083	28.7108	22.2731	28.7814	23.0592	22.3737
O75717	6.03242	12.1197	9.72208	10.2117	8.59759	13.932	15.3433	8.15247	12.3201	16.6365	13.7918	13.503	12.2596	13.2952	14.198	15.6502	18.9198	7.66807	7.97243	7.93383
O75718	46.8569	36.7522	45.9716	26.7507	60.7045	36.373	27.4906	31.7732	29.2204	28.3353	28.3968	32.7144	34.3089	25.2046	20.3804	26.3623	17.793	15.2831	25.1605	20.1613
O75787	10.839	11.4782	11.0165	14.1559	10.0383	12.8542	10.7302	8.5487	7.20625	11.9837	16.4551	18.3313	10.5058	17.1715	18.0508	14.7378	14.0719	12.0527	16.4294	11.0079
O75794	5.94898	17.9284	13.7678	8.70457	12.4861	10.7467	33.1499	22.1591	17.0051	26.8878	22.0289	18.2686	8.89546	15.5298	16.5142	28.0957	13.2905	30.9051	19.6137	19.0764
O75821	58.5125	67.6344	74.8475	56.4742	53.4	56.3306	68.5898	65.0133	68.4127	86.0493	85.4907	61.3708	76.0084	93.2227	77.3045	119.531	97.3525	123.105	106.878	108.757
O75822	19.6904	23.0533	35.3712	46.7482	28.2106	57.9592	74.8727	65.0258	60.9422	78.237	41.4095	54.5698	69.6832	75.4595	48.9973	66.2101	92.2913	67.5998	68.7715	61.4353
O75844	34.1758	16.0435	20.4155	14.5209	18.5779	26.1127	16.4074	28.8056	20.1973	19.624	15.3931	11.6021	13.8316	17.2861	10.9669	17.0489	8.78617	13.4501	14.8149	14.6714
O75874	64.9554	97.9436	97.3579	82.1302	55.3647	28.7047	47.5432	59.2832	36.9452	57.2149	54.434	84.8952	80.6987	57.9452	67.4372	68.7043	100.115	54.0186	60.3245	48.74
O75915	45.3857	31.303	32.398	40.54	51.1619	24.4216	21.5335	51.9383	31.0846	33.5261	27.6985	21.4398	40.084	36.6712	26.2492	34.2486	19.1236	29.3471	31.568	29.8436
O75935	19.712	15.4797	19.024	22.6288	24.4037	17.0539	22.6685	15.7079	23.5004	20.739	25.1768	35.9733	25.2358	16.0607	18.2711	12.3237	17.5344	17.8534	14.7786	14.4018
O75937	57.1207	40.3281	39.1991	44.1949	38.9716	35.7942	28.8199	36.1193	28.7006	30.3302	41.742	25.768	51.1041	39.7988	29.0529	44.2376	32.5133	50.9979	38.5086	35.8878
O75940	12.1009	7.12783	15.1882	3.88941	7.7667	15.2853	14.8602	26.3329	7.53045	10.8818	10.1791	11.5127	12.2329	13.2823	7.86504	5.86749	10.2684	9.86534	10.313	11.9278
O75947	69.1165	69.3537	78.8245	40.4814	65.6499	65.879	32.0285	57.0183	23.0216	35.0785	63.0828	53.1778	56.3183	72.3177	41.1715	67.4527	22.7483	54.3831	52.5156	57.2657
O75955	10.9008	7.69574	7.49638	12.5294	7.14082	12.1535	12.9441	13.3489	8.73519	6.71737	13.8969	12.8356	10.7935	11.332	11.3112	11.4251	16.9751	12.4493	13.9515	8.14617
O75964	140.068	70.1269	57.3082	64.928	115.777	109.096	33.4355	68.138	66.9445	67.6537	89.294	50.6589	79.8831	83.3632	65.1419	77.9391	82.2291	87.3521	110.799	120.344
O76003	46.5639	85.2354	65.219	47.2808	67.4325	67.1555	67.621	74.2342	67.3972	100.551	81.7834	109.904	70.0964	82.4058	72.1274	90.2182	74.8973	84.678	80.0135	90.8307
O76021	55.734	43.256	31.1123	32.653	47.7549	79.9526	41.8848	50.1206	36.7778	41.4426	68.5498	40.0746	79.7712	60.6322	56.9185	43.8394	48.8393	113.828	74.7062	89.4218
O76031	14.1665	18.9721	16.8561	13.0064	13.0842	15.4021	14.8682	15.838	17.4535	12.4967	16.2924	15.9477	17.7632	12.2418	20.4955	14.2588	14.1204	16.3137	20.0056	15.5142
O76071	18.0146	30.9597	32.257	35.1112	41.9643	11.5083	5.4169	7.45505	9.59847	1.84161	13.5593	12.498	14.6287	8.60408	12.8686	16.4116	10.8647	14.4642	10.9072	13.547
O76094	15.4116	12.6971	12.0547	13.2522	16.6577	21.2253	15.4016	13.8214	20.6936	13.1875	11.7728	14.5379	9.66936	14.2622	14.1921	11.076	10.7511	10.4952	14.5708	11.8564
O94760	24.8553	20.2889	22.6352	19.4911	34.7256	10.2577	8.92266	9.20737	9.62874	10.8807	17.3982	15.2657	14.9707	15.3516	15.8662	8.87465	23.5408	15.6257	10.0191	10.8863
O94776	56.2766	56.4232	38.0847	44.0186	49.2937	56.5991	38.8048	50.395	54.2613	54.5861	33.2142	23.0343	26.8651	40.6404	20.9763	25.8807	16.3447	27.2911	26.4781	34.56
O94826	24.7603	9.24981	14.8171	12.6182	13.3315	18.2582	15.2491	18.8309	13.2569	15.4325	20.717	20.2945	22.9317	26.2459	19.3589	20.1038	17.0748	21.0959	22.4496	20.1048
O94842	19.8503	13.7373	3.89607	6.82747	3.39246	4.08127	2.23613	6.13091	4.43067	5.45625	5.79409	6.74038	3.82343	4.93378	4.53988	10.5085	7.67989	4.17373	9.34428	3.62021
O94874	28.0599	10.3437	21.6517	12.1195	13.3166	20.868	21.0962	11.4846	10.6093	10.3971	14.303	16.4762	13.2157	11.9369	9.84441	13.9856	9.40667	12.584	13.0074	10.2074
O94905	15.5076	16.2916	13.5471	25.6462	20.8036	22.3083	23.0695	13.6264	13.803	9.71069	11.2585	11.4488	8.63421	11.8601	11.2876	16.9726	10.2459	10.9527	6.91802	11.9578
O94906	43.4428	36.0121	26.277	36.4641	34.0855	58.4626	48.6977	50.8961	44.4422	55.982	32	24.2729	34.0455	27.8641	28.3807	28.4451	18.0716	34.4923	29.6546	29.4248
O94925	69.9141	72.2848	137.961	72.3435	173.614	37.9167	21.6907	158.126	48.1893	119.601	26.1044	16.583	30.1142	12.9501	24.2372	32.834	19.7648	19.2163	26.2623	20.1787
O94979	46.8607	43.9575	38.7351	51.4724	50.4394	31.0433	37.7605	29.6832	37.5684	32.639	23.6472	22.047	23.6854	18.2283	20.392	30.3069	26.5013	27.58	29.6295	20.6431
O94992	6.54717	11.4983	4.80421	7.67114	5.88395	3.2356	1.43124	4.82375	7.04002	5.24841	13.6617	8.33982	5.10052	6.75201	6.23175	10.584	5.82179	8.58505	6.24534	10.9439
O95071	11.3356	7.93476	5.15212	6.94544	4.54336	10.6577	5.01045	7.62573	4.63722	7.42538	7.55617	7.22263	5.94762	7.73838	5.43995	9.66408	5.33669	7.60481	6.12178	5.03257
O95155	9.27622	10.8558	23.8634	17.3893	15.4522	15.5052	10.4763	13.5227	11.5765	10.4468	11.8754	8.71642	13.3447	9.74862	8.90454	12.2567	11.5844	5.56454	9.04928	8.23681
O95163	15.3923	8.04408	11.5261	16.0404	12.263	12.1993	23.0175	12.0376	13.4827	10.5958	11.6425	15.2431	11.2044	11.3535	11.3233	18.3786	13.0679	9.9055	7.22895	9.71086
O95197	58.5315	41.5357	25.9295	61.013	59.0116	66.5516	33.8894	72.0322	56.5226	53.1567	67.1619	45.5542	42.976	53.0112	37.3415	41.7275	30.6634	34.2107	39.8333	31.2589
O95202	21.1908	17.7774	18.6549	20.5597	17.1844	20.1455	10.5846	11.0872	13.1562	12.5963	17.2891	14.9174	15.2722	11.2509	11.3834	14.544	10.9029	8.88147	14.125	13.0264
O95218	46.6647	51.605	45.0884	35.8288	38.4329	40.3393	30.3652	44.3188	25.2006	41.2568	33.0915	20.2963	28.9721	24.0979	21.6532	42.9737	30.383	26.4366	21.3733	23.5265
O95232	36.366	22.2384	16.8694	24.4373	28.5302	12.8559	11.2447	11.276	5.59027	8.77959	15.4089	13.1901	12.9171	11.6517	9.98075	11.0165	20.7193	22.9469	21.9458	22.4324
O95292	18.9448	16.6037	31.0204	23.301	25.7822	14.3072	9.18685	12.144	9.30844	14.8884	18.0786	13.0937	13.4371	18.1866	8.76308	17.3643	5.45237	13.0826	13.179	12.0069
O95302	32.9907	43.9194	70.3584	56.5111	51.1522	30.6436	40.2307	24.2051	19.131	18.712	13.9934	20.6157	14.888	16.6231	11.9824	11.4739	15.2323	6.34327	13.9744	8.31324
O95336	30.2061	20.9191	59.1763	37.8121	28.109	21.3519	42.9561	41.5028	22.2517	23.6487	26.992	49.8469	35.2756	35.9758	41.2109	40.4238	53.5844	33.1023	34.5076	35.437
O95347	26.1817	22.3443	28.3257	36.0872	32.9538	22.7625	32.1912	31.294	26.2822	30.3353	26.2527	32.2834	23.7761	23.9515	23.8503	19.5736	27.517	20.8988	21.6018	24.5896
O95361	20.7026	22.0408	56.9245	26.0532	50.0443	11.2949	17.8253	36.1305	19.5304	23.2099	15.2064	19.6151	9.10149	9.53276	13.7719	13.5997	11.9011	10.2036	11.2301	8.16682
O95372	23.7287	41.1822	33.9117	29.6472	21.8592	20.3297	24.3378	20.5842	18.5968	28.0982	29.5292	25.1393	32.2451	18.585	28.2748	27.8974	30.0649	23.588	21.1096	18.7928
O95373	73.1972	100.568	113.723	70.1382	112.724	77.622	86.3493	92.8124	90.0577	120.81	49.6751	45.1325	47.0782	66.4894	42.9047	57.2276	44.2785	38.9999	56.8965	53.4757
O95394	16.3045	15.2372	27.6995	21.1928	15.4329	10.7939	12.5777	10.5569	9.19069	19.3466	12.4697	17.4392	13.39	12.0271	10.9415	21.2191	10.0227	12.8674	11.7531	12.0666
O95400	21.7736	14.812	24.4626	27.2797	26.5334	38.1266	15.3121	18.7067	21.6843	32.6671	24.0411	16.7873	18.0216	17.2785	10.9922	21.8961	10.7534	14.7067	15.7643	18.5526
O95433	27.6292	24.406	31.525	28.9768	48.5008	34.1535	45.867	36.9147	46.0189	45.2607	52.0584	34.572	68.1612	60.1666	48.6679	61.096	51.0209	36.2493	63.3098	71.9591
O95445	97.4552	33.0424	105.043	17.359	6.06349	191.478	146.353	9.53159	153.825	254.942	57.8139	70.3696	134.423	145.793	64.1417	140.408	21.5821	3.82357	64.6218	13.1916
O95456	82.7596	49.8689	74.1139	50.0806	75.2259	108.934	101.365	102.646	140.126	102.594	14.3943	13.1829	26.9139	20.7643	12.7017	16.887	15.5892	24.3094	16.9368	27.3405
O95486	14.2667	16.9023	12.9917	10.4777	13.6777	13.7834	10.8542	7.58508	12.2297	7.74542	9.38082	8.37562	9.36921	5.48373	8.51684	14.7621	13.0301	8.58912	13.2241	10.2313
O95571	30.9369	23.655	21.1127	11.5366	18.2324	16.0102	24.7852	13.9098	11.2976	13.9939	10.1549	15.6821	13.8291	17.5875	11.9503	7.67863	14.742	7.62949	12.5721	17.9754
O95573	28.8126	23.5998	24.5932	29.8233	35.0066	47.465	26.0383	60.8026	52.6894	43.1624	35.4263	26.3133	35.1452	45.4835	30.2096	47.0908	27.0811	28.2413	29.9507	38.4373
O95602	10.1715	12.2757	18.78	11.2625	4.80687	14.4727	13.0762	9.72286	12.4121	6.93507	14.9424	10.7925	13.6139	10.3111	8.34457	10.5301	9.08937	15.0315	11.0271	8.45679
O95678	968.806	870.301	256.196	972.239	264.92	134.207	125.335	335.195	287.323	236.822	372.144	303.43	459.453	132.072	350.438	554.525	221.647	698.593	639.879	687.58
O95747	72.4881	65.9118	52.1119	46.4813	38.7857	25.563	34.8676	44.9602	26.1501	50.826	34.0044	34.8932	43.0489	30.4691	33.7504	39.8961	41.8975	32.0014	34.6189	25.3108
O95757	22.7715	32.4316	25.9437	30.1551	27.4432	19.8026	28.555	29.4855	27.0688	19.8193	33.8536	36.6613	27.557	21.6744	31.1392	32.9487	22.8053	26.2719	27.0946	24.6297
O95758	24.0197	25.5512	9.41442	17.9228	10.1233	14.49	9.18066	8.95704	10.3531	11.1265	8.04084	6.72867	8.20903	8.52992	9.48358	13.1284	8.50599	7.49995	10.863	8.35317
O95777	42.7958	22.6632	42.2229	23.6784	23.1406	42.494	34.7255	21.3291	20.5443	31.5335	28.8896	56.0927	33.3359	37.4113	33.5961	39.1583	52.7781	49.5251	42.0849	43.4603
O95782	22.777	15.2115	14.5894	18.2166	11.4651	20.4018	22.4939	16.9945	14.9938	16.1491	21.8224	17.1759	14.1154	13.7666	16.0235	17.4211	14.3792	12.4346	16.5394	14.2588
O95816	33.3953	30.4065	41.2095	33.6075	30.3064	26.4086	34.4024	20.9049	24.1255	24.9207	41.4989	41.3699	29.1962	42.3604	51.3515	55.944	30.9296	45.6238	42.4304	42.4343
O95817	5.00858	8.99486	13.3024	17.6992	14.5256	13.9397	17.0521	7.15659	15.298	17.4429	16.5741	16.355	10.2393	13.105	16.4606	15.3272	12.9546	19.5083	11.8046	18.249
O95831	30.7559	32.7354	20.6767	24.2864	15.5271	26.556	16.487	23.7845	27.1705	13.7653	26.3521	25.0138	24.3145	22.2616	23.6171	29.2249	31.6448	28.9708	29.677	30.9015
O95865	16.7959	9.87369	14.7243	11.5441	9.97947	12.8437	9.56563	6.59166	10.7692	10.0895	20.8876	15.9913	10.3099	10.8253	21.1038	10.5022	48.2163	41.2803	6.19553	3.90196
O95867	99.067	26.5378	47.128	25.4429	11.5663	21.8331	13.3164	17.3242	15.6005	11.6522	80.2658	64.881	18.5529	25.9092	55.9694	11.6201	73.3559	31.0502	14.991	6.42648
O95881	33.967	36.4331	27.2942	43.2343	34.1485	15.52	22.3173	23.4232	16.7952	19.2166	26.4593	21.3207	22.5065	25.2722	26.1191	26.7413	13.9022	12.3423	17.5207	23.6324
O96000	26.7434	22.3818	6.88369	26.9102	22.6325	31.6417	22.4864	16.9494	21.2747	7.36898	52.9721	36.8349	40.4797	39.2582	35.8375	40.7253	28.9169	43.6507	39.3435	44.1682
O96005	7.37879	3.94563	7.24216	6.15935	7.60043	10.9606	13.22	9.76584	8.46585	8.03062	8.76245	3.73383	4.38059	5.60371	13.0773	11.6681	6.63458	5.58017	7.22768	5.7846
O96008	69.5535	22.6544	20.5408	28.8868	68.1909	81.3817	24.8258	69.8163	56.0047	54.6912	56.6106	31.7348	41.3166	43.96	36.9836	51.944	32.2502	38.3329	45.9636	55.8679
O96019	40.6595	45.6279	47.3553	52.1793	37.3741	36.944	50.5215	59.9099	49.9304	36.0388	44.7277	38.4364	48.5863	37.1534	36.6765	34.8523	43.5913	44.102	38.4941	35.4824
P00167	3.4196	12.9553	5.43809	25.3226	10.7228	27.4257	13.7944	6.35857	13.2417	12.0735	12.6641	12.9176	5.1187	9.46474	7.38596	9.12587	11.4418	8.2783	11.7853	9.46907
P00338	1198.31	1483.43	2338.4	1837.93	1493.23	1316.16	2427.78	2094.03	1967.11	1836.49	1813.31	2583.12	1992.99	2019.3	1964.37	2462.2	2887.97	1508.91	1906.5	1902.6
P00367	41.0506	70.7745	55.6945	42.0078	37.5058	48.0658	38.724	36.4257	33.6194	41.3484	35.4532	33.3568	41.567	49.3744	37.7075	16.777	35.4089	33.8875	31.1346	36.3724
P00374	24.3731	18.0942	20.496	25.1493	13.8413	8.57609	32.5492	9.84343	10.5738	12.3547	12.1752	15.5932	20.7979	11.72	13.3865	17.6904	18.4543	9.75978	13.4659	10.3471
P00387	50.734	39.0727	63.4778	49.6142	98.4236	52.354	34.1485	77.4315	47.8333	34.0281	35.1257	23.5522	28.1872	38.9765	26.879	35.1382	27.2116	31.4552	28.2646	26.5783
P00403	143.515	36.0208	45.5249	51.9792	59.2682	86.234	80.6528	141.111	52.3821	29.399	86.2438	69.0788	46.2234	75.4371	80.7196	55.354	86.3123	67.7453	72.1471	82.5751
P00491	120.324	89.3082	95.6307	104.22	61.0262	96.4504	122.126	138.326	87.1081	129.278	209.061	193.402	89.2537	107.951	173.118	105.997	222.164	137.493	102.784	106.579
P00492	23.6459	27.3664	20.0486	17.5719	12.9856	17.5533	45.4737	36.5413	27.5126	46.2942	76.4657	94.4648	80.0725	71.0145	85.5206	75.2337	94.574	47.3408	67.177	71.5599
P00505	120.384	195.303	122.003	104.51	84.8206	135.853	145.049	87.0942	138.536	115.54	156.97	166.746	116.77	139.884	141.498	86.1128	156.444	147.309	116.847	137.213
P00558	256.562	331.298	434.019	289.034	290.42	197.4	317.555	374.756	312.961	512.932	344.639	461.506	354.095	303.552	374.677	393.864	590.89	343.423	332.494	394.038
P00568	52.7867	50.2472	66.2486	49.5264	41.7755	43.2026	68.6088	108.991	62.5906	48.2122	27.7414	34.359	26.2567	35.9304	33.408	33.8314	28.6081	31.3461	25.0937	31.3597
P00846	87.1945	37.6968	7.47863	28.9118	61.1259	38.7261	9.24912	23.3438	18.3769	13.4429	61.0492	32.4216	50.3505	60.5687	62.1808	53.7456	44.2941	73.7	75.327	73.9283
P00966	10.6316	22.4092	14.2547	19.3787	44.8058	28.3073	94.0213	23.2324	22.7977	12.1224	337.802	469.54	170.954	273.936	336.152	465.694	178.376	299.9	308.524	258.606
P01023	297.783	208.962	559.605	78.1406	36.5135	764.389	696.901	13.6821	618.123	920.611	79.579	98.3764	450.666	415.924	60.0433	125.474	114.031	13.5164	47.4354	61.3159
P01024	233.397	227.113	200.208	82.9652	20.9661	408.637	336.302	54.2827	292.245	505.178	103.365	157.027	347.789	420.345	317.007	262.781	74.3141	19.3638	125.038	29.39
P01034	19.1641	11.2592	17.4766	5.26104	9.71397	8.28834	9.69474	10.2044	11.8183	12.5965	41.6957	20.5451	10.057	25.3901	14.3502	8.44851	19.4386	15.0623	5.06771	9.30192
P01036	57.3713	18.0433	25.8476	28.467	8.59636	31.1329	25.226	10.4622	18.1884	38.8801	183.484	205.68	22.4451	23.8905	25.9592	104.629	58.214	23.3478	46.7324	28.9519
P01040	495.576	253.552	245.236	281.407	165.013	199.824	252.787	92.5725	122.821	136.198	1211.76	2972.32	832.556	402.985	628.362	400.745	2870.74	1604.25	630.356	219.785
P01111	75.8916	65.9826	75.2177	33.7055	52.9961	63.0134	37.6572	59.031	43.0414	41.0062	45.3133	38.9212	35.5731	32.9431	42.07	40.1143	29.1271	40.2655	50.1338	30.3815
P01834;P0DOX7	26.588	5.77821	4.15941	13.695	4.32863	5.83201	7.57926	12.6228	2.28256	8.44869	45.0394	55.3714	10.0624	31.3266	32.6714	11.4658	13.7612	11.7497	12.6172	4.95334
P01857;P0DOX5	111.611	34.4615	82.6977	156.138	20.2073	45.0767	43.1963	32.4768	38.8565	36.3395	71.5521	122.995	40.8277	69.485	123.288	71.6848	220.427	102.091	28.0588	20.3643
P01859	67.4	21.581	47.5443	78.385	20.6026	35.3366	55.0495	21.2264	17.2922	34.3061	53.2472	38.5324	19.8568	60.7916	40.9753	50.5551	145.193	56.8738	12.8888	10.8836
P01877	54.0707	23.8646	31.2944	32.5867	10.2911	18.0106	14.9911	8.40156	8.44833	15.7573	115.233	246.492	17.6697	47.1558	55.7598	77.0365	74.5168	31.8416	39.5735	29.4589
P02533	7288.22	1821.27	1186.61	15722.4	1068.4	5509.66	4594.36	2860.08	2588.03	3294.73	40467.9	30560.1	423.299	4722.7	26880.5	434.947	1532.57	253.292	431.698	503.094
P02538	5085.27	1218.32	761.753	5095.06	418.057	4176.17	2803.77	1926.93	2168.36	2388.84	34688.4	20017.8	356.995	1964.98	28129.1	358.569	1327.21	256.808	387.981	555.951
P02545	1250.37	761.657	1213.26	1266.72	940.019	933.969	682.984	668.471	789.441	541.826	562.243	524.431	839.138	636.441	484.781	603.649	610.547	551.307	534.825	627.828
P02647	144.086	818.693	133.871	79.8407	16.7015	150.563	762.439	43.2282	50.9769	64.5222	54.1809	129.431	38.8323	69.465	101.647	300.603	34.7325	11.1763	191.922	20.4784
P02649	168.639	198.828	55.7483	40.9739	16.1065	319.439	80.6225	18.5194	63.3422	221.231	81.0501	182.496	56.4443	136.257	163.034	495.583	29.8483	17.0754	204.195	19.4261
P02656	261.309	406.465	81.2208	150.967	22.4259	344.69	125.189	17.0214	82.9965	273.851	209.07	517.052	138.888	613.75	497.169	1369.26	56.9461	48.4256	1368.6	46.9332
P02749	218.519	103.46	99.0648	26.6287	5.97963	267.158	99.7098	14.7931	119.09	384.486	58.2776	198.133	138.666	276.068	252.794	482.759	46.0939	27.4968	168.805	20.2373
P02768	674.17	414.193	474.398	451.716	121.461	734.319	857.104	194.937	579.323	734.345	804.412	1689.9	831.378	1047.37	1203.59	1307.48	2850.26	1360.66	600.578	389.289
P02771	282.81	164.266	472.189	39.374	30.431	963.066	724.337	20.7546	723.221	794.587	128.629	220.185	714.54	811.201	35.2231	246.617	217.239	28.0553	59.5809	119.102
P02774	13.5436	26.0161	21.0301	8.33361	1.344	143.925	136.559	6.18397	104.908	157.972	7.62168	7.28161	36.5318	58.8838	5.55588	5.31868	8.30393	1.72572	8.95817	1.15244
P02786	28.7767	17.4101	40.5927	45.9704	35.9225	48.4208	47.4603	28.7023	31.5256	25.6797	54.2317	72.2403	46.9159	57.9088	48.8412	89.7905	41.4177	57.161	51.7878	42.7643
P02788	73.3399	38.5003	80.0265	33.3854	19.0111	64.994	258.284	15.6613	218.766	378.33	122.364	166.835	36.1677	60.1458	63.1991	48.1797	42.4632	11.829	58.1974	25.1433
P04004	23.9265	86.1959	67.2349	41.3422	7.26907	121.641	58.5287	6.90136	82.7052	149.539	14.4072	35.7904	18.2074	34.5146	33.4863	58.1535	8.05731	4.68911	16.1934	1.95732
P04040	167.424	82.0479	73.5685	168.307	28.2116	73.6717	73.8062	40.7771	39.1537	49.9407	245.083	339.108	52.1703	154.516	256.658	59.8014	116.933	50.981	50.4131	27.2515
P04049	11.0088	8.13616	11.873	9.57771	14.1574	5.75842	6.83665	10.6602	4.38762	10.1926	9.89388	12.151	9.73955	8.22264	14.2004	17.1424	11.0379	8.73444	11.8639	8.53227
P04062	51.151	25.0792	28.8221	32.5437	21.1991	22.6027	25.6161	21.8393	18.3948	9.3054	39.9299	50.19	10.4511	21.3452	30.9513	10.7456	15.5348	8.47791	12.7995	8.06114
P04075	628.113	1047.97	1294.07	894.993	1077.91	543.164	929.985	810.461	788.36	1019.88	755.926	983.899	831.41	704.404	903.298	957.31	934.442	877.842	699.179	861.804
P04080	192.897	247.135	195.683	144.171	184.402	47.4004	128.924	78.7479	146.364	126.963	98.6257	134.671	111.679	111.169	118.273	141.693	124.132	94.3114	110.42	111.949
P04083	280.047	238.161	522.144	289.386	430.088	275.677	337.671	514.321	336.396	463.624	278.791	442.169	435.578	322.589	313.215	290.413	433.253	194.694	251.334	273.345
P04114	90.938	65.2857	39.3096	62.1593	8.94685	291.819	217.27	14.7271	176.237	292.53	83.9917	87.3983	125.468	177.184	112.926	152.606	46.9337	12.015	48.153	22.3118
P04181	21.232	13.7556	26.0688	28.3225	28.3629	33.5035	24.1418	24.9222	17.8314	25.2667	72.7606	46.5515	44.4296	39.9719	52.6419	31.0838	86.366	50.0934	49.1525	32.7849
P04259	40689.8	8289.94	8189.21	32354.2	6363.93	23393.5	13826.2	11919	13655.5	13044	162705	66767	1011.41	6650.79	70767.2	1228.24	7456.68	1153.33	1529.86	2394.59
P04264	26585.6	5377.65	3981.92	43114.1	2302.14	18287.8	12906.7	8216.05	9660.72	10693.8	52154.7	39386.8	1375.28	23067.5	41937.1	1071.8	4695.38	658.828	1374.54	1079.45
P04350	97.1477	190.708	200.758	128.592	78.2209	73.6572	68.5667	35.2192	49.4041	65.6875	28.9853	45.5428	29.3098	30.4696	33.6548	41.3538	67.784	28.5012	17.9326	37.2539
P04406	3979.54	4280.22	4911.63	4577.28	3603.24	3110.34	5023.67	3607.85	3881.43	3730.28	4264.08	4707.26	3279.58	3121.9	3751.22	3820.92	5270.67	3090.86	3669.96	3504.59
P04632	26.9537	23.4457	28.3054	37.3483	27.0684	19.4233	23.2481	50.0209	32.8806	40.443	38.9581	47.4919	31.8762	43.0122	48.5334	35.1274	35.6334	22.7056	35.3375	30.0529
P04792	319.743	268.763	1445.93	805.732	1277.61	406.988	299.716	759.983	641.121	294.258	371.795	296.419	280.295	243.293	339.315	342.786	440.215	322.711	264.418	246.639
P04818	49.4714	21.6499	18.5875	36.4623	28.5982	21.7659	24.3863	45.2595	44.0164	34.2571	40.5798	65.7799	60.1212	48.5646	52.7719	40.1277	38.3369	54.8559	45.1638	41.7835
P04843	151.709	90.6563	121.774	115.506	142.174	119.644	111.775	104.741	105.913	89.3643	128.869	108.073	105.977	133.45	126.336	123.27	72.6182	124.105	106.946	121.352
P04844	89.2683	87.8568	47.9778	49.0432	70.6331	88.7013	54.6663	69.4668	70.9272	60.5854	86.7336	63.198	61.8029	84.2305	66.4465	79.1484	51.2662	63.7255	70.9264	64.9155
P04899	76.0441	72.7975	30.1418	73.5169	74.788	39.5417	26.1083	47.4162	46.9773	32.8025	44.2923	47.7934	56.4585	36.5726	37.7002	50.5152	29.634	33.1535	41.101	28.5762
P04908;Q7L7L0;Q93077	6807.09	1059.81	2626.23	5405.1	4787.55	3719.11	1917.69	4074.4	2888.58	3176.9	3812.83	2634.11	4154.9	4705.15	3479.76	253.949	4950.61	3562.84	3625.28	2154.21
P05023	94.1586	70.7206	72.0531	80.901	86.4862	95.9589	58.0496	122.614	75.5332	85.2147	87.3063	64.857	58.3415	61.4976	66.9817	76.1186	84.2739	58.4088	74.8698	74.8168
P05026	36.4688	17.0079	27.1727	17.9347	27.0616	18.7686	8.13809	21.9998	15.8683	23.4635	8.25765	10.4969	9.36249	9.66363	6.68864	8.81968	9.63477	8.1457	11.2786	10.1813
P05089	877.939	297.952	432.365	599.027	103.49	148.576	160.562	53.5783	85.5105	85.0126	1113.45	1782.4	95.6413	579.923	860.483	74.8579	798.142	668.246	94.916	69.5722
P05109	76.9513	31.7593	29.6247	31.0895	6.67761	10.8579	9.20029	7.77401	11.3057	9.63866	55.4413	99.7053	22.8994	17.4569	70.2488	19.0271	27.3438	10.4115	23.1312	15.931
P05114	44.5373	27.9292	12.534	10.6236	26.1896	7.75096	7.20219	11.6073	8.86295	9.30084	17.3864	25.1328	19.2676	33.5384	16.2626	4.57836	17.5273	8.45989	17.8149	12.1257
P05141	639.912	119.482	146.793	297.83	543.334	582.619	195.923	565.028	423.41	665.351	523.95	365.875	415.465	620.685	430.352	684.03	708.196	573.783	588.926	702.24
P05198	54.0664	71.4017	55.5507	62.6591	63.6646	70.1603	99.8028	76.5761	74.508	73.8527	57.6953	47.3233	69.3097	98.3426	76.8443	88.8222	73.9181	66.5259	83.3688	94.4027
P05386	133.194	309.865	286.423	80.1881	178.811	128.2	83.4743	84.7938	199.658	167.838	185.112	174.33	153.293	170.678	171.746	201.109	128.178	201.228	210.243	206.842
P05387	595.41	436.566	845.543	676.745	702.522	502.798	485.54	546.707	418.949	569.259	395.472	526.248	528.83	509.878	428.519	583.672	624.902	476.562	532.775	515.23
P05388	236.453	245.74	328.76	248.191	194.421	224.144	253.156	229.608	178.199	181.933	224.756	273.875	216.85	248.704	242.93	269.157	275.144	308.082	256.423	299.798
P05452	62.7645	129.53	24.6239	92.0003	11.5397	125.593	51.4847	36.2125	54.5053	114.18	67.225	129.893	43.5937	126.691	132.909	172.596	41.7907	20.6582	96.3269	6.82642
P05455	55.2072	57.6948	52.0987	49.0896	58.6241	49.8946	56.8097	52.2859	54.0166	57.4125	73.3306	87.1503	108.917	78.869	55.435	88.897	96.2428	70.329	81.4902	91.7213
P05546	105.135	56.4732	165.79	14.5458	4.11914	182.133	141.792	8.71096	120.039	132.471	20.4626	63.8968	102.024	130.139	70.5338	90.1449	24.8308	6.20778	37.2955	14.4115
P05556	52.6614	38.0268	77.6255	48.6395	90.3345	81.0574	98.0863	88.1329	71.6878	71.2776	33.7589	33.2236	21.5252	35.4076	27.2741	40.3806	27.9015	24.8526	24.9002	24.6548
P05783	487.165	688.51	167.334	210.067	205.556	131.72	89.7056	332.548	227.072	191.011	482.664	495.197	449.653	660.499	400.128	643.61	473.347	564.659	603.504	685.942
P05787	1178.17	1623.55	427.308	576.199	732.748	258.268	445.678	1412.3	538.267	483.806	988.21	1121.81	832.721	1338.77	774.39	1393.8	847.318	1220.49	1166.24	1180.84
P06132	17.0612	15.6349	35.7415	12.9405	12.4268	6.68681	11.9083	19.6362	26.6585	9.95268	13.947	10.2983	16.3044	8.00014	10.4788	12.5371	13.1462	5.24806	6.59104	11.4214
P06396	176.037	297.002	124.483	123.389	51.5112	332.926	118.985	88.258	151.982	327.653	232.15	351.335	169.416	290.708	429.568	332.809	98.19	70.6997	152.397	26.0889
P06454	188.2	131.693	222.274	134.542	163.419	411.247	315.056	245.881	257.515	309	88.0873	161.711	113.775	80.8388	142.214	117.422	198.66	92.6954	100.915	118.05
P06493	69.6636	82.4731	69.7906	76.4808	60.1908	75.2724	69.2181	59.1227	67.7594	101.468	50.6949	60.745	55.3711	58.2129	83.9077	67.5018	59.235	75.2918	59.4994	48.6015
P06576	445.026	253.862	250.683	284.097	338.212	475.51	238.641	300.132	244.716	235.51	378.391	363.838	356.721	386.975	290.676	386.467	317.505	359.022	399.97	374.468
P06702	328.64	169.269	146.107	154.12	61.2911	40.5567	30.416	22.0749	23.946	29.2221	136.77	203.687	62.5108	40.4835	133.122	34.4436	89.9197	48.5629	41.7528	34.6692
P06703	1973.87	2498.62	3495.47	3090.13	2803.71	961.168	1782.62	2282.19	1673.25	2087.63	762.865	903.607	1039.33	1046.41	867.083	1111.08	1265.83	831.62	1053.75	1060.98
P06730	39.7731	74.7896	84.8572	59.2913	62.6309	28.2951	44.1108	36.9483	54.2517	67.3001	30.7663	22.0693	28.9803	34.1272	28.5217	28.3991	23.4054	27.1547	31.7561	35.2297
P06733	1308.85	1189.02	2106.53	1494.21	1503.37	791.75	1164.93	1339.15	984.337	1363.96	1491.88	1886.05	1792.15	1493.17	1627.44	1639.66	2845.17	1584.63	1604.03	1602.49
P06737	49.1489	44.9938	55.3434	55.2891	41.9242	18.7202	43.3784	35.9008	28.0428	32.5693	43.11	60.3612	73.8873	38.9418	55.4917	64.57	87.4896	19.1659	48.4809	38.0028
P06744	272.337	133.679	293.376	251.823	190.99	191.484	329.741	237.953	332.728	350.864	251.668	295.866	247.875	231.042	268.31	256.345	255.118	206.827	246.581	236.338
P06748	199.94	230.586	180.484	95.8658	119.791	474.264	221.494	300.905	254.493	178.677	458.002	361.327	484.283	419.903	371.361	396.303	440.477	546.886	462.88	616.156
P06753	197.24	201.839	332.267	265.496	274.626	275.117	248.172	200.474	201.897	176.027	169.349	189.295	148.841	125.08	142.136	115.305	190.317	95.2992	109.207	93.5565
P06756	22.5285	7.56305	18.3527	10.5057	25.1549	16.7196	18.6829	28.1381	15.6354	17.8551	4.24656	6.57065	6.14392	6.80609	7.20743	6.62706	5.50383	3.81112	4.83477	4.96432
P06865	23.5464	35.3662	17.4448	9.85319	9.71984	26.4932	29.8382	11.0504	12.1115	9.26639	14.0998	17.5212	18.2447	13.1553	19.6375	17.7051	7.56245	8.18205	14.6737	7.07174
P06899;P23527;P33778;Q16778	1659.84	165.977	561.887	1562.83	1027.79	1339.69	415.045	1510.25	816.963	826.721	1062.4	947.756	1230.14	1277.59	1050.08	72.823	1502.78	1236.33	1484.27	1081.71
P07099	36.3761	22.7433	43.1119	45.7028	67.4567	13.2333	13.3863	33.4662	11.3664	14.5283	10.7031	17.6542	10.7203	14.6297	12.0973	9.96755	22.1004	8.34885	9.99896	5.72193
P07108	52.155	48.4032	52.4787	51.1894	36.8851	60.9267	94.5995	100.988	65.893	90.9359	89.0901	124.522	118.396	119.276	133.175	113.647	145.301	104	99.4806	84.922
P07195	803.57	1207.86	1413.24	950.213	1016.7	824.876	1610.48	1007.7	1338.45	1268.95	1250.85	1598.36	1312.85	1172.07	1380.42	2100.4	1915.08	984.583	1315.95	1470.26
P07237	259.863	296.388	259.389	223.831	145.169	195.213	364.74	245.794	290.759	166.459	160.245	202.425	142.787	186.917	165.492	195.867	159.517	153.692	171.115	157.937
P07339	500.365	265.399	258.793	273.447	128.638	75.6285	67.1844	69.252	46.2129	53.7454	201.283	486.737	61.6607	159.063	211.654	72.3668	254.863	210.554	100.425	54.8161
P07355	1711.59	458.69	1351.74	1753.94	2000.51	1256.47	1097.31	1494.31	1227.8	1341.34	1139.7	1077.57	772.16	858.041	869.576	694.81	1226.95	911.825	692.13	711.414
P07384	62.0983	41.2042	46.1939	61.8265	26.2113	29.8292	50.2741	27.1862	38.2246	41.0301	44.7822	48.8602	23.3194	31.5602	54.1163	27.902	37.6686	24.3288	27.542	18.4661
P07437	613.381	1252.31	938.137	820.604	1079.7	495.798	632.503	594.365	528.542	475.912	534.231	594.077	457.306	570.414	604.41	840.578	632.478	633.758	680.939	753.464
P07686	16.1602	34.391	10.3025	20.5441	10.3105	17.3835	15.5048	16.744	20.3673	9.83715	44.6695	65.6411	31.8796	38.1226	34.2752	21.4006	34.3067	19.3014	22.219	17.7277
P07737	1281.66	1490.73	2607.2	1331.05	1754.6	890.397	1555.22	1617.75	1453.28	1318.71	1004.32	1200.31	996.849	979.96	1040.95	1247.84	1431.52	805.364	1061.92	1132.44
P07741	44.3779	97.4568	78.6037	62.966	50.1835	46.8705	104.026	34.3993	55.2911	47.4884	59.5409	59.6213	65.7542	36.6231	65.1179	77.53	84.3924	60.323	52.5409	51.8137
P07814	115.939	127.966	107.243	98.024	106.309	79.4986	105.412	130.96	104.626	100.107	88.9415	107.643	146.167	119.581	114.221	125.716	129.566	150.614	130.659	131.662
P07858	61.2499	47.8848	36.571	61.2356	18.6151	16.2182	16.3461	14.2653	15.183	7.14824	66.2003	128.974	47.1954	53.6582	46.3589	30.1329	62.9447	59.5241	35.7562	29.0208
P07900	708.385	659.363	1039.41	759.278	894.367	686.442	1536.86	803.636	1084.47	949.491	1113.02	1144.37	1460.76	1156.58	1295.36	1449.6	1500.58	863.877	1133.91	1474.62
P07910	458.152	400.458	374.868	287.433	328.222	333.138	253.237	300.374	269.718	263.067	282.638	237.698	354.2	250.843	242.13	421.957	181.37	313.023	320.327	350.209
P07951	86.1873	108.011	180.562	138.869	147.763	202.995	74.3134	209.406	110.492	52.064	66.4104	62.6763	51.3236	48.9351	67.7528	71.8103	62.2606	64.3273	59.9796	63.8079
P07954	35.5757	53.5577	56.2326	44.5574	38.3958	36.3731	38.5863	35.4612	33.2284	33.5147	68.8672	102.975	89.6794	76.7015	79.295	63.5207	96.9351	61.8126	79.4326	78.8383
P07996	107.497	145.111	77.2248	51.0742	63.8444	151.586	66.8777	40.7247	96.5238	127.914	44.4021	205.608	73.8637	162.923	287.692	356.271	52.5944	26.64	138.78	11.5958
P08133	42.5753	37.3101	62.1932	64.0547	56.7925	35.6675	49.2873	40.1397	46.6847	35.409	39.6349	55.7063	45.3456	43.3095	57.7561	61.7774	72.9143	29.1773	47.6467	34.1755
P08195	180.722	132.432	109.821	105.444	187.639	284.189	157.447	158.616	191.943	216.823	175.162	128.789	101.329	98.2048	135.72	155.977	81.8204	145.289	113.183	86.6196
P08237	35.595	39.4063	56.7931	39.7921	41.6908	37.8408	42.8121	39.0497	46.0693	34.8474	55.9503	86.9728	56.6117	54.3883	71.7771	52.7107	51.6317	56.7089	51.192	55.6752
P08238	1466.08	1770.86	2409.43	1639.98	2302.88	1408.66	2169.54	1577.74	2076.59	2070.29	2065.98	2070	2480.05	2341.14	2271.13	2688.8	2199.96	2375.3	2221.42	2532.26
P08240	27.3443	12.7731	21.054	13.5922	17.3094	19.888	12.4836	19.4115	19.6976	13.8473	23.4541	13.3608	19.6449	17.431	18.7051	24.7687	16.597	22.3367	20.6115	19.7492
P08243	15.6385	25.2865	15.0294	22.909	12.5844	10.7792	27.5461	27.0038	10.5224	21.9027	10.652	17.0913	29.3247	9.7838	15.5456	21.0871	17.28	34.4007	18.7897	10.3103
P08559	55.1367	84.9523	34.3874	33.8795	60.0723	43.5442	20.4285	44.4838	49.2991	32.6648	51.6893	31.7353	44.0608	50.12	45.1532	31.9636	24.1462	37.0108	46.2131	42.0083
P08574	12.795	14.9723	21.0728	19.1749	19.5808	21.1194	4.23058	13.8461	6.50497	5.29441	21.5756	11.2735	12.7524	16.5991	14.7931	22.2321	4.21739	19.9627	20.0285	24.9699
P08579	32.778	35.1538	24.0226	43.0462	32.2855	48.5959	43.8761	36.5332	29.9979	36.3091	42.2073	38.4299	34.537	34.4116	25.438	31.7632	34.0522	37.6014	33.1715	33.7217
P08621	66.6818	65.3842	48.8209	64.6347	67.9721	63.8097	44.7009	46.6056	48.4224	52.3256	42.2455	40.1841	55.1534	34.4011	38.2532	45.3081	48.0025	50.6697	51.0538	50.5162
P08648	15.7177	12.6896	60.1807	24.036	117.65	30.5214	34.8552	31.9759	20.0537	35.0853	27.0738	20.6771	14.4914	20.1603	24.4363	14.0884	19.7951	18.0542	19.0405	14.9382
P08670	935.929	1652.75	1718.91	1003.49	1640.1	1461.29	870.742	917.731	749.679	787.983	401.722	488.716	839.564	457.055	407.031	712.228	557.181	350.933	527.02	579.007
P08708	16.8212	15.2073	9.08989	11.0173	10.8161	29.8928	22.788	30.7468	14.927	19.6905	19.9894	23.6604	19.3202	24.2117	29.0146	29.8801	24.6337	25.9256	31.5887	19.8843
P08727	203.382	542.215	104.5	153.352	315.087	381.652	328.926	259.579	269.335	260.541	2747.02	1588.15	68.0747	212.289	1365.26	101.705	166.466	66.9087	64.9457	98.701
P08729	339.559	582.716	245.839	205.997	518.655	887.99	1057.35	1880.02	395.355	759.674	494.293	415.403	405.877	580.008	270.419	421.517	420.097	254.941	465.097	571.728
P08754	35.4148	24.5614	31.7068	34.571	58.5884	36.598	18.8028	22.5119	13.7961	5.39684	35.1902	28.5221	28.9639	23.7675	38.3042	27.9736	25.0034	24.443	22.0244	15.4466
P08758	372.358	359.54	798.326	464.628	679.214	417.126	609.566	426.833	531.076	524.66	244.06	328.349	380.566	350.714	275.683	320.254	473.22	249.062	273.712	262.63
P08779	464.696	71.1231	53.0499	332.406	19.6041	302.596	212.286	122.381	166.673	184.986	6339.54	1573.85	32.2426	76.2782	1798.36	23.0742	113.318	19.9058	22.4986	41.8021
P08865	445.822	396.128	467.039	483.267	571.139	307.784	358.834	362.824	340.179	366.539	383.693	376.629	376.253	411.843	434.88	475.915	461.976	471.735	465.78	411.945
P08962	56.8831	14.1948	25.8085	18.6198	68.829	80.4819	27.1417	51.222	41.2269	54.8421	57.8267	42.4503	59.2834	78.3149	61.3445	67.4231	31.3423	22.6175	46.9411	57.0686
P09012	48.5912	40.7003	49.2178	27.0089	28.0565	30.9425	39.2597	41.056	30.7536	44.6301	37.9351	35.8846	44.2492	37.235	30.4839	30.7975	46.8966	36.9621	41.0208	48.2879
P09104	828.755	1148.21	1926.34	1499.06	1255.89	461.261	859.421	551.803	631.172	534.044	843.335	1111.84	796.46	702.574	728.867	697.98	1103.25	633.707	693.893	629.933
P09211	97.0974	104.397	162.092	135.453	130.712	95.126	189.426	101.379	134.81	133.033	61.6312	68.1352	63.9097	53.8757	68.396	79.2928	110.819	61.1249	60.078	48.0531
P09234	23.6614	15.0105	15.2666	18.0819	26.2801	32.1218	15.0378	25.3701	15.968	26.2393	24.4357	14.6154	18.7686	12.8535	18.1154	15.3872	10.8594	18.2686	17.7386	10.5245
P09382	151.042	212.056	570.658	335.409	584.835	178.135	270.262	288.721	340.193	134.03	74.7834	163.714	107.831	125.107	82.4715	121.21	114.293	67.0574	130.61	113.778
P09417	21.1312	24.3569	20.3506	11.7433	14.017	16.4581	37.2235	7.8146	14.1555	20.2505	18.8514	28.2739	15.524	12.8677	22.1251	14.7589	17.544	16.2981	11.7993	12.027
P09429	23.8967	31.1078	20.6598	21.221	19.6235	23.4445	16.7446	12.3121	15.6588	22.2418	18.8149	18.3448	28.8555	39.8306	34.7811	18.8951	27.4175	20.5182	26.529	27.0466
P09496	79.9122	91.0732	114.973	65.5453	96.4221	70.9741	101.831	82.573	114.472	98.4155	72.9326	74.1322	56.1774	68.9053	90.2837	65.1743	55.9581	74.6442	70.7932	79.0724
P09497	25.6019	35.7094	47.4155	23.4391	26.1831	24.5543	25.6908	54.143	34.8007	42.3997	32.7727	49.9324	29.1086	43.3056	41.9536	44.421	29.6793	33.7219	30.8696	34.3608
P09525	38.8968	23.121	25.5509	33.651	15.4565	18.1947	27.9367	21.4306	19.2175	9.4328	33.9785	36.5701	30.1184	25.8343	39.4832	22.3723	68.7676	50.1093	18.3364	17.4911
P09543	28.01	9.75871	17.0459	20.3963	15.161	15.8567	19.0478	15.444	21.9843	16.911	19.7854	13.3894	11.0505	12.3206	17.3756	12.3392	10.3419	9.39915	16.6874	13.1841
P09622	16.9295	12.9239	10.2801	13.4297	9.4492	21.7172	19.0576	9.26327	21.4466	15.7375	16.9702	20.5873	13.6392	18.0913	16.1765	13.8682	14.4621	12.3168	13.035	10.4467
P09651	340.606	257.829	355.815	320.487	279.311	532.266	365.243	365.294	290.997	313.909	312.389	279.567	303.264	302.48	236.271	336.63	280.465	366.514	314.434	362.498
P09661	58.2204	49.1359	48.8358	46.9795	42.8159	78.2803	51.5879	58.286	58.2573	56.0363	63.6043	62.3004	61.134	53.7616	49.4454	55.7303	63.7534	72.7946	65.3115	70.4864
P09874	111.238	112.172	82.0632	100.241	82.3855	88.5092	70.1917	88.4902	89.9608	62.2662	100.357	90.484	154.559	104.861	95.5827	62.2039	129.644	115.948	139.993	117.483
P09960	41.8013	37.1664	35.5313	37.4227	26.2919	36.507	64.4108	46.3748	45.7228	45.5195	58.2699	84.4956	73.9889	60.0084	63.9249	51.745	83.113	57.4564	37.1514	63.8504
P09972	93.1269	93.3741	135.154	180.078	99.8359	62.5403	215.6	145.567	94.6066	189.161	99.7524	119.001	105.779	123.686	134.029	115.735	145.044	107.853	95.787	70.2613
P0C0L4	54.1856	87.8043	54.0954	22.2812	8.92367	131.57	81.3343	15.3917	84.6265	171.427	26.3054	42.7572	61.1347	80.7923	49.5904	69.4274	24.4471	10.4057	45.0177	13.3046
P0C0S5;Q71UI9	272.218	169.272	20.7244	151.445	213.48	262.103	180.248	192.592	161.58	214.194	77.0397	106.088	116.284	122.701	98.814	11.7558	104.606	124.833	106.825	107.404
P0DMV8;P0DMV9	1624.29	1629.38	1782.23	1872.38	2630.95	1366.34	1789.25	2278.73	2187.84	1757.77	2278.48	2546.03	2976.73	3097.11	2397.71	3039.21	2670.71	4142.7	2812.09	3222.76
P0DOY2;P0DOY3	84.1802	35.1205	34.8981	80.7026	45.0056	7.80833	17.378	7.73119	6.95376	11.5229	49.025	128.691	24.2767	29.6386	38.5585	62.1925	73.3851	53.8055	32.7502	19.4314
P0DP23;P0DP24;P0DP25	41.3438	35.2229	18.9226	28.9287	8.12193	22.5951	55.617	75.1223	54.9917	17.7001	26.8721	37.5987	8.05523	12.1717	13.8151	92.0683	22.0252	21.8156	12.9398	32.9182
P0DP57	124.781	32.7174	52.039	45.6224	16.3559	21.8697	10.6984	3.90449	9.8314	6.76448	70.0819	139.701	31.5663	17.0465	24.0775	25.7596	77.6729	50.2805	28.2655	19.6454
P0DPB6	30.321	19.6058	10.9973	15.7532	12.179	20.6622	20.479	25.7522	13.5538	16.9427	27.3983	11.1028	17.0216	17.2524	19.3673	24.6309	25.6047	16.7702	23.9631	20.2858
P10155	16.3164	20.5418	14.0845	15.0934	9.02305	5.52263	12.2518	3.81745	10.3143	13.0238	8.77114	12.1493	6.44971	5.93474	5.73222	7.04546	11.7046	4.32079	6.88606	6.09774
P10321	29.0848	51.0045	33.4778	58.3828	28.0666	5.82335	5.19519	10.7587	17.8729	15.5767	16.3756	12.4669	16.1082	29.5579	14.8748	19.0478	24.656	13.4052	21.2591	12.2797
P10412	1901.97	531.599	632.318	1497.13	682.954	931.551	374.486	606.164	351.691	380.411	1103.63	1147.1	1492.7	1137.69	750.525	560.972	1195.23	1443.66	1490.38	956.701
P10515	31.0439	41.1425	16.6286	20.9408	21.399	40.7853	17.5357	23.0815	26.1493	25.7661	40.4681	38.2377	25.8554	28.443	30.8081	36.4684	19.2416	37.467	34.6284	33.8768
P10599	563.611	467.518	1005.08	947.024	791.238	405.219	726.95	540.286	479.313	632.864	1111.82	1730.93	658.38	768.394	914.248	661.682	1292.7	761.437	415.854	538.556
P10606	57.1003	34.2071	31.9983	39.3887	23.268	44.8832	50.3721	34.0018	34.8354	23.1944	49.2434	69.3773	65.7683	77.0694	56.8091	52.6885	82.8542	54.5545	55.5744	61.6152
P10619	36.1885	27.0399	8.12014	19.19	10.9563	14.5451	32.2261	6.00956	11.3986	19.8112	33.8081	62.4477	14.0765	12.9755	25.6919	8.66181	19.4916	14.8144	11.7322	8.35459
P10620	15.1447	7.79699	6.94137	7.84634	33.1186	35.2378	13.9707	43.5699	23.2785	24.9428	22.7536	5.22766	21.3057	37.5958	23.8601	24.8978	13.2867	19.2942	29.2541	19.5326
P10644	25.1293	17.4498	54.6164	38.478	21.5422	20.4084	28.4547	23.0366	30.1242	17.3212	8.94845	13.3491	15.0285	12.186	14.2061	11.6825	17.2876	25.0178	14.9585	12.2918
P10768	32.8575	50.0396	67.0854	59.6577	31.7677	12.6057	39.9657	21.3218	28.5463	25.6109	40.3089	51.2947	38.9526	46.756	40.7103	54.6483	73.8121	38.5949	42.1949	42.6092
P10809	1098.31	1359.49	1292.55	1048.67	1082.51	918.377	577.652	720.905	1005.74	887.602	1106.29	1330.56	1093.97	1131.99	1027.8	793.478	1209.6	1131.21	1014.61	1245.4
P10909	16.6738	39.2321	10.4042	34.914	7.07689	5.7713	17.4994	16.0445	34.1163	11.4257	21.1832	25.6704	20.8093	18.2206	17.9554	23.1654	14.008	18.5242	10.2288	9.1106
P11021	502.475	381.62	954.858	488.469	798.099	445.802	375.97	461.272	499.016	438.271	492.294	477.98	294.284	485.876	388.23	508.225	364.583	449.825	381.03	357.133
P11047	11.7419	10.7913	8.61525	14.1388	14.6094	9.92842	5.33995	6.52935	8.13998	7.88564	16.9013	25.8215	5.7248	9.75403	14.2449	6.57116	9.15014	9.32248	14.4131	7.77155
P11142	740.549	741.438	1236.33	926.657	1061.35	917.224	1056.62	1042.11	1004.2	1099.19	867.839	1051.41	828.556	927.049	902.736	1211.12	991.742	925.557	928.242	938.783
P11166	49.8256	62.7762	55.3706	46.1897	95.4209	75.5599	19.1745	113.531	36.2725	123.636	40.5008	22.2003	21.5418	36.809	26.5706	45.4504	19.1363	13.754	34.8827	33.1462
P11172	12.78	16.9905	24.4104	19.2352	22.2345	22.3098	32.0498	17.72	23.3555	20.9632	18.8726	19.4577	18.1865	20.9662	22.4515	22.7391	16.7244	17.7648	18.6113	22.7191
P11177	73.3995	116.206	70.0057	48.0232	73.7317	50.7814	40.8536	48.3529	48.5355	50.0451	47.4144	36.4761	38.2347	44.2814	34.2688	34.4651	33.4192	29.3217	40.8259	43.9671
P11233	35.8065	30.6136	39.128	32.5268	32.7443	40.4009	23.4035	27.0209	28.8379	30.7515	23.7791	28.1185	23.9867	24.8809	23.5098	17.6229	27.8057	25.7228	30.8262	21.1992
P11279	90.9959	25.2435	41.2541	36.7242	29.7555	46.9661	29.2165	48.6334	49.0794	39.4418	67.7071	86.0931	14.9262	46.2238	51.5184	31.0916	77.3946	42.0154	22.4295	26.59
P11310	65.6596	47.8389	40.179	66.8503	37.4555	51.8549	49.6078	40.6592	57.8237	27.4172	29.8963	48.571	35.9883	42.5166	38.1116	20.2597	47.5213	25.1388	25.9092	40.7118
P11387	80.9789	78.3322	55.569	47.0192	61.5226	94.3975	55.816	61.96	70.6951	98.1443	75.7546	46.96	61.722	85.9087	67.6199	32.0571	64.5865	99.8355	88.7839	98.7004
P11388	50.2564	72.9098	50.3888	77.8499	58.9829	21.3947	84.3616	92.7867	58.1063	78.4969	57.8363	80.7511	58.6558	91.2208	78.2488	23.4926	64.9777	65.5064	59.373	66.4069
P11413	114.951	220.248	122.823	185.045	128.646	63.032	106.685	232.295	100.395	279.525	88.176	93.7456	122.443	69.8497	129.529	111.072	134.941	76.5597	115.17	78.5624
P11441	13.3795	16.8425	9.75952	15.0261	11.0899	14.0775	24.8511	14.3702	13.3159	24.946	10.1632	10.5937	14.2592	16.0288	14.3492	14.034	14.213	10.1626	14.1647	13.2809
P11498	35.8647	20.6767	20.1194	33.5929	15.2227	19.9881	22.372	18.6948	28.7514	10.758	32.8918	27.6977	15.6168	29.5207	26.7906	18.7578	15.8191	12.8576	17.8559	17.1307
P11586	123.646	155.958	142.128	128.141	134.942	49.056	98.3253	87.6697	86.0231	94.0767	105.486	109.144	156.518	117.363	107.932	127.947	143.288	70.8203	115.794	118.292
P11717	32.7297	17.9507	22.2154	19.4076	20.9121	23.4158	20.6713	12.0349	23.5668	22.5867	17.426	15.2644	13.5025	17.3386	15.2926	19.704	12.6906	13.9508	14.6592	9.04926
P11766	42.726	80.7778	93.849	65.3829	58.7623	31.8639	47.7375	37.1371	45.3653	45.8514	33.4129	56.3743	39.5769	34.9651	47.3272	52.3292	54.6047	24.4629	36.6459	37.3786
P11802	13.7482	16.2856	26.7289	18.2586	12.5719	9.27904	11.3087	6.09799	8.60251	5.71471	13.3182	11.6027	7.55595	7.63107	6.98432	9.37001	11.5041	12.1051	10.3866	10.5387
P11908	6.44586	38.1799	18.3073	6.12136	15.4495	9.04072	20.5687	23.9311	14.9681	38.1031	24.1793	19.8238	17.7985	15.6486	24.8056	8.19812	9.48284	14.5474	10.8878	7.75817
P11940	116.711	147.141	149.771	142.445	153.397	189.948	186.087	191.191	174.502	169.593	138.772	134.884	162.594	153.227	162.469	162.001	150.014	202.205	179.407	164.428
P12004	125.706	120.544	90.5484	100.233	81.4092	108.427	179.469	82.1164	103.708	75.7247	76.8341	117.306	103.999	94.6036	70.666	95.3032	75.277	100.076	91.5612	76.3742
P12081	80.7762	82.3371	74.095	92.1053	90.4527	57.1946	102.518	95.1817	90.9174	97.344	96.1168	82.9777	76.2905	76.5508	122.027	73.6895	107.009	81.9135	76.297	79.0377
P12109	72.5878	65.5447	42.4945	4.53666	4.84297	79.3249	53.3757	18.5267	45.5289	75.1671	7.17845	28.6257	38.9803	53.9445	41.41	34.1617	13.5805	4.02885	23.2777	3.84133
P12111	21.8606	17.7111	14.5419	13.388	13.0976	17.7435	10.1493	10.0865	13.762	20.5401	23.1608	23.5188	12.7811	17.1933	31.4819	53.9093	16.394	9.57992	27.6447	10.6466
P12236	61.3954	18.5342	25.0362	25.8597	30.6772	50.5464	28.4428	42.2539	43.1705	41.8835	35.4897	48.8231	23.2359	18.6183	18.483	46.907	49.2008	30.08	37.4393	49.016
P12259	45.8192	81.7496	25.7961	17.3942	9.33512	50.0556	26.4792	9.52033	28.3915	51.7723	27.3407	62.2722	10.2999	77.0666	118.076	202.677	15.1709	8.01445	47.3417	6.2235
P12268	85.8571	115.083	126.862	106.778	156.181	106.66	90.668	69.3292	95.1406	108.671	164.025	160.389	177.508	171.738	153.785	200.165	142.376	157.238	190.671	188.553
P12270	31.5149	33.0107	34.7996	32.6368	33.5821	37.3624	36.6984	29.407	28.3148	26.9721	32.7455	30.0018	38.8072	33.3833	26.2173	36.4495	26.296	19.6407	27.6769	26.3632
P12273	99.8296	124.102	66.6443	64.56	20.4766	45.2193	19.1974	49.6368	56.8008	57.7268	98.258	157.63	27.9567	17.5833	41.4682	56.9784	47.8694	14.2418	32.3858	17.8157
P12277	140.104	96.5133	18.4744	95.7792	85.6069	114.512	214.668	56.7669	197.297	9.44008	139.384	105.597	129.617	132.798	166.974	217.405	128.801	130.505	142.274	182.1
P12429	37.5893	132.432	108.09	28.8061	106.239	69.0159	52.2221	108.233	90.8282	71.1177	26.5573	27.5219	15.5741	55.8974	18.103	22.2899	29.3263	20.1662	26.7343	19.3876
P12814	190.776	191.261	236.654	168.773	390.72	302.37	179.752	264.327	205.314	234.573	157.755	114.939	122.637	137.507	134.725	112.833	117.184	78.3614	150.099	135.011
P12956	207.118	224.928	193.79	201.489	163.498	191.74	166.78	175.563	170.421	162.576	120.534	112.955	151.748	127.127	99.8129	128.297	109.018	133.063	130.155	134.084
P13010	128.271	161.557	121.829	125.119	134.113	136.28	133.854	155.859	127.071	116.028	105.119	93.1581	124.928	97.4491	97.6418	105.989	102.109	95.9044	104.953	98.4381
P13073	56.9604	37.9822	36.3959	56.1857	50.9767	87.6874	56.4596	64.2167	49.6093	29.9933	91.7249	92.1645	85.2191	79.2511	78.0211	101.239	81.9428	113.823	85.5362	92.9572
P13489	20.5638	44.632	37.9694	11.3471	17.9359	18.3082	23.934	23.7162	25.7121	21.8998	28.5698	28.7185	31.8879	29.8869	29.8649	26.3223	28.9029	16.6869	39.222	20.7607
P13639	705.488	513.476	1098.49	815.117	1095.26	672.08	802.429	894.014	835.175	773.985	966.155	885.344	640.449	766.821	991.185	1025.58	977.029	1248	843.167	909.202
P13645	9986.84	2242.12	1977.02	43943.7	1910.55	8419.96	8348.12	2599.97	2935.12	3651.87	14034.6	42650.2	567.553	10911.6	9284.24	427.497	3551.06	234.11	830.758	329.363
P13647	3937.22	1141.03	823.918	9953.31	527.801	3561.38	2998.5	1614.49	2106.97	2446.28	24049.9	15228.9	235.859	2597.61	12040.6	175.515	824.255	129.301	276.647	252.129
P13667	54.147	59.8497	89.1748	102.957	72.4568	77.0593	73.5827	38.2719	101.679	54.7598	100.489	96.8225	93.6187	102.511	106.094	101.354	74.4448	103.403	131.582	85.4273
P13674	14.5383	20.3072	20.6158	17.9426	15.8252	22.3778	21.7859	11.8244	15.9988	17.3729	36.4508	35.891	23.785	37.9244	21.4276	33.0226	16.2489	24.3578	28.4847	21.8895
P13693	19.0553	20.2348	30.57	38.8379	23.0346	24.6083	24.5318	17.2574	19.2261	15.4318	23.5852	25.6239	13.5353	20.0199	24.0447	14.6924	15.3912	23.3646	23.5148	26.3945
P13797	91.5292	117.222	120.986	106.68	200.643	98.8504	164.654	235.205	132.614	171.802	91.3099	99.1192	82.5471	97.7827	109.55	87.9192	97.4399	96.434	88.7608	87.9677
P13798	62.9794	86.5772	62.071	58.2303	31.0598	23.6816	48.4088	24.4447	31.1133	38.5661	47.8757	66.6444	40.2116	34.6803	59.0117	63.7844	43.7716	26.3279	39.363	33.499
P13804	44.7286	17.4835	57.5308	45.2823	39.0894	62.56	44.9133	36.305	38.0309	35.0051	51.9726	57.1981	53.7478	53.5653	56.8812	38.9516	48.1164	42.7058	46.8498	55.5931
P13807	24.8094	10.8319	18.2599	14.8131	13.3306	11.9068	23.1438	23.216	17.2435	16.2558	16.9105	16.54	11.4441	14.0734	16.1454	18.5816	15.6738	10.846	16.5985	13.8765
P13861	42.1469	32.7425	35.2501	39.3937	25.9316	19.2861	21.4536	21.767	17.1561	22.8358	37.778	29.3584	29.5244	26.2746	26.8551	33.9237	32.2938	27.5557	32.3928	28.0519
P13929	20.3756	27.1942	32.9294	9.92083	8.85443	20.0969	37.7168	15.5926	16.4764	19.3893	18.7963	33.7313	26.9344	26.7632	22.2408	27.3527	25.3828	17.992	18.0697	19.5913
P13984	12.3302	3.82865	8.50688	9.61484	1.85581	25.1199	18.8741	21.0234	27.0755	25.9778	22.1673	11.1395	7.49514	16.1071	20.5938	13.0301	27.4744	28.3467	20.0068	21.9376
P13987	45.4798	35.645	20.7935	31.1572	32.2307	49.2407	49.2562	82.7251	97.1963	42.7084	73.9053	153.137	49.6562	48.9657	47.3485	52.7103	81.7166	63.0056	58.9203	42.4575
P13995	11.5933	31.1731	9.51751	8.86374	15.9555	32.1398	9.72851	31.605	13.4845	12.8053	46.3148	34.7068	37.0635	21.9087	47.0898	22.7929	20.6174	46.8926	47.0027	34.1286
P14174	313.053	431.838	289.22	254.209	292.659	57.6391	45.1798	151.841	23.0817	131.484	65.2196	129.69	30.6881	24.3603	30.8522	95.9841	102.12	82.7503	30.0555	70.0539
P14314	71.0886	102.733	105.421	80.7344	110.902	119.222	135.696	93.3086	119.771	77.3256	90.6886	77.6427	75.9878	105.061	77.4327	79.0339	58.0046	74.4967	81.5752	75.5443
P14324	86.719	100.369	188.639	267.385	118.394	49.5418	94.5457	165.356	109.74	85.2436	72.5704	98.3428	124.238	91.5029	95.4956	115.737	164.019	104.955	82.0445	93.2183
P14406	63.8482	34.6987	6.35299	13.5487	63.8645	60.9568	45.4035	57.2714	45.6214	13.4266	57.2799	35.3808	84.2957	92.2097	65.454	73.7076	123.106	64.6395	72.5254	105.273
P14550	34.7369	20.6073	46.6065	34.9234	15.2199	33.1142	49.4386	15.0843	19.8706	27.1356	27.7398	33.2396	31.633	21.7314	25.956	38.648	40.942	14.7021	24.4016	19.7278
P14618	1755.01	2934.21	3556.69	2540.73	2501.79	1467.47	2337.76	2450.09	2061.19	2485.95	1584.99	1925.26	1765.92	1526.64	2073.43	1731.2	2330.27	1661.89	1686.53	1280.81
P14625	257.23	376.547	364.325	392.344	356.955	383.318	465.217	238.852	423.132	232.037	342.839	349.2	271.565	363.378	338.462	351.046	216.032	279.23	280.775	330.46
P14678;P63162	37.1714	32.0612	9.78959	17.4642	17.6061	50.4458	28.3399	34.0249	53.6233	39.0867	40.5786	43.7445	49.9045	28.2289	44.8855	27.784	54.2853	41.3885	38.3019	32.1604
P14735	43.9182	39.8143	51.1418	47.9241	28.1518	29.3561	46.0064	32.2577	27.9367	34.7483	142.247	67.821	34.8841	45.9557	86.2839	47.5419	102.122	72.9346	41.9665	35.1646
P14866	120.703	119.563	88.7556	111.521	93.8367	173.606	112.436	127.209	126.378	115.067	139.295	75.4171	133.836	104.019	98.0152	108.183	98.1605	99.387	108.977	103.963
P14868	42.6354	59.9035	33.0491	39.9986	32.2798	40.1452	30.6882	37.6223	53.4762	52.3435	47.8612	38.7303	54.0309	46.8749	56.2472	49.1472	58.4195	50.6833	56.003	50.3231
P14923	185.69	108.141	87.572	701.197	47.7059	128.187	136.578	84.3215	79.9952	63.925	1017.38	1456.16	49.157	386.714	682.64	46.9307	50.4904	27.586	35.2626	24.1706
P14927	26.9577	31.2176	19.6078	21.56	32.3971	37.1217	37.9128	22.2851	27.7734	12.8587	32.1357	30.8039	30.839	42.8697	37.5329	23.7213	31.6448	23.7735	29.9843	38.5044
P15121	130.999	194.793	456.397	203.041	259.435	133.148	239.773	1294.8	202.13	228.185	157.749	174.507	132.958	127.163	134.657	203.053	261.688	165.056	230.888	126.211
P15170	33.9144	52.663	39.343	41.6364	52.7666	36.4083	47.5813	60.3725	31.1344	44.6121	43.3584	38.8817	40.9948	46.7998	38.679	33.2159	42.9565	53.5983	39.7635	39.0894
P15311	124.76	120.662	112.01	97.1668	120.984	99.1655	76.2678	177.683	100.572	89.9671	88.637	70.6407	81.7311	94.1048	70.4672	61.6205	63.3739	83.8912	85.7955	89.1633
P15328	210.971	146.019	18.9311	67.3913	5.93391	23.8777	15.9881	40.7163	26.9011	45.8935	17.0318	36.8536	37.0033	50.3301	46.9851	78.4743	70.0565	41.8168	39.6039	62.828
P15374	15.0264	26.8958	52.3965	32.2739	24.4666	25.9976	32.8181	16.7865	22.2837	30.0025	19.5145	30.3644	11.5452	22.4953	24.5711	25.8014	19.9128	18.8162	14.9735	17.9278
P15531	63.9727	76.1089	70.3806	80.235	52.1851	70.939	119.144	96.2947	67.1714	73.7545	106.243	137.122	104.008	98.4054	106.015	119.839	125.578	115.675	106.455	115.573
P15559	117.655	98.0769	400.453	224.423	241.835	54.0639	129.108	116.058	97.7063	97.4659	41.5191	43.7738	48.0203	29.3881	46.6835	42.5269	41.4607	35.9999	45.2689	35.0822
P15586	40.5334	54.3292	32.0441	30.3965	20.7469	40.0032	24.4325	22.1335	28.5607	33.27	33.8733	44.0525	18.8858	23.0044	33.1522	21.3348	20.9702	19.0425	23.6073	14.7723
P15880	219.998	276.306	278.921	242.252	334.524	210.885	230.65	244.545	226.877	235.012	229.636	250.271	261.06	250.955	251.889	270.613	242.55	287.731	248.1	251.412
P15924	734.171	217.608	244.549	655.166	96.6878	273.464	298.553	175.771	187.168	207.569	2381.43	1363.19	147.915	389.098	1239.4	121.425	340.605	185.052	122.502	77.0562
P15927	30.1648	11.2309	8.77066	10.855	7.92203	13.2865	10.3053	12.5748	8.12722	14.2077	18.2874	17.2727	22.1204	17.2457	11.1647	13.4358	18.852	14.4799	16.6563	15.3415
P16070	64.257	53.2487	79.9772	50.7814	64.6563	117.992	77.7468	94.0961	55.8896	103.555	53.3685	50.4056	53.0748	42.8693	41.8165	51.7045	55.5656	56.227	78.0772	53.6386
P16152	84.7229	141.753	150.142	95.9879	132.58	64.0683	137.596	107.336	94.1387	100.822	62.6266	91.7147	73.0603	60.1915	84.0836	86.8549	105.986	56.0555	76.6314	66.9811
P16401	636.674	393.353	269.066	548.451	329.864	321.265	174.996	175.323	159.147	207.221	143.464	137.379	230.866	154.009	164.628	134.579	212.201	210.068	243.54	192.722
P16403	323.892	77.3175	191.925	434.227	80.606	201.177	142.418	92.9345	75.3518	33.5246	153.1	330.994	292.226	153.758	69.1452	235.968	759.358	337.406	375.714	246.143
P16435	25.4108	17.4074	27.7764	30.8487	36.4916	46.5806	24.1085	30.3609	25.2573	25.4798	25.6972	34.9886	37.0274	28.1157	22.6806	47.8242	16.2782	39.571	40.1751	29.5388
P16615	108.664	86.9075	87.6555	79.8653	136.787	149.316	102.572	105.831	102.498	90.4731	144.217	123.281	123.931	147.087	129.406	180.654	115.606	142.877	189.809	160.336
P16930	25.627	29.0814	20.7205	17.4362	14.2542	13.1022	17.4706	8.39202	8.64404	15.4367	16.4625	29.7293	40.8084	20.3331	20.0263	19.5877	23.9053	15.5963	11.6564	19.0038
P16949	170.437	185.506	102.909	130.734	71.2985	41.7385	82.7299	38.4854	64.6297	53.8589	69.8021	68.8357	127.681	86.1437	69.1017	49.4007	155.821	38.5743	77.772	77.086
P16989	24.6278	22.5444	29.2954	24.4507	16.0809	47.7373	56.3356	30.1442	26.4869	14.8978	43.8929	46.0926	39.0811	33.5923	43.9353	49.6907	31.8805	47.0442	42.9811	46.7868
P17096	86.3176	38.3785	37.8318	47.4599	19.3299	122.738	59.1154	13.4931	49.8113	69.7464	62.4961	37.6203	69.5345	63.4287	14.9377	14.6188	78.3187	70.797	78.091	109.788
P17174	45.4643	57.65	39.8799	46.6805	32.3759	38.123	64.5407	53.4001	64.1743	45.5916	77.3762	79.4985	64.1537	58.7319	55.2508	53.3888	93.0816	61.9009	53.3107	57.2516
P17480	32.3209	32.2585	16.8287	42.8461	9.02898	17.5451	17.7049	18.0812	10.6858	10.712	22.7311	12.3951	22.8671	19.0825	15.8892	9.47781	14.3282	15.5722	20.58	19.2859
P17655	36.1192	48.2828	80.6919	39.9968	70.2767	35.145	47.1944	85.1758	66.534	60.4947	29.6991	36.7643	58.5484	59.2133	46.3722	31.9498	40.743	30.3558	42.4053	42.7583
P17812	54.5437	55.9096	135.291	74.273	106.383	45.2491	60.9449	67.1919	62.8388	91.0881	98.7895	127.387	85.3884	90.0797	100.019	115.742	72.7963	78.3096	104.165	113.408
P17844	133.71	111.982	114.442	111.76	103.035	153.143	102.449	164.143	119.607	146.741	129.376	84.9181	131.066	141.441	104.446	137.592	80.53	155.397	132.068	178.256
P17858	35.5924	103.481	67.0559	52.5304	51.7264	51.7461	53.8479	52.1273	56.8742	75.0906	53.8392	82.7156	54.0613	57.0117	75.1801	74.7572	49.3597	35.8906	50.4393	51.7114
P17900	49.4732	12.8823	34.2083	34.9121	9.68639	17.9012	20.118	16.4011	12.7987	22.0586	29.7244	78.1328	17.0868	22.3997	35.6587	17.2827	64.5543	53.9181	22.7833	11.0374
P17931	160.256	124.904	125.991	128.995	102.851	50.3702	101.162	99.928	64.2838	67.091	133.476	132.042	104.908	112.738	110.383	111.31	146.22	92.7159	98.1359	128.357
P17980	48.3071	50.3675	70.7307	66.6259	53.9721	67.1019	73.1546	60.8854	63.5842	69.0284	59.8074	67.765	65.015	66.1401	63.184	84.799	56.7058	62.298	66.9427	69.798
P17987	210.833	204.886	288.558	243.071	254.044	245.861	273.669	229.04	285.216	285.424	222.319	299.228	282.602	293.351	278.452	345.299	249.366	300.509	282.124	355.242
P18031	27.4865	14.841	15.0946	18.3129	23.9261	33.2767	16.506	19.502	24.4671	27.4473	18.9655	14.8376	22.4485	20.7271	15.0355	18.0925	15.8563	21.9173	16.4	17.6298
P18077	154.728	133.074	150.288	130.768	135.653	80.6161	100.056	108.58	71.0044	82.0362	81.2526	88.5088	73.8983	75.9671	82.3446	87.1034	84.2761	76.7328	90.627	74.3478
P18085	110.494	103.243	130.834	113.158	88	84.2134	66.1839	62.2621	102.988	93.1514	64.7542	51.0314	51.2588	67.6807	58.8306	73.8648	64.9	64.9578	63.8028	64.713
P18124	500.828	527.931	491.366	479.964	498.433	388.857	406.552	406.241	378.655	431.611	350.392	372.324	417.369	396.679	375.177	411.834	422.261	369.333	381.387	358.16
P18206	186.921	181.968	349.736	179.478	430.795	191.884	159.582	209.709	179.659	167.551	175.253	248.818	149.105	217.639	185.057	140.705	182.843	159.136	136.974	149.374
P18583	16.5478	13.8207	10.0714	12.5539	9.85156	16.0093	14.2332	12.1716	13.9564	8.92683	19.542	17.1391	17.0029	11.0268	13.0857	18.3219	12.85	14.2891	15.8688	14.625
P18621	118.586	109.134	148.438	98.5828	152.711	165.514	189.304	183.902	163.153	148.919	128.548	113.663	140.046	146.501	148.695	146.287	156.954	157.441	153.306	143.554
P18669	77.3202	88.3666	118.574	79.7493	87.5091	67.6645	123.117	75.8702	114.883	115.44	107.887	117.375	95.0692	97.1483	101.43	110.604	101.923	111.439	101.157	109.147
P18754	108.009	75.0816	55.6323	74.2141	64.1465	89.7575	61.1104	74.5044	61.8478	89.7013	82.1271	58.2962	78.6279	88.5961	57.2094	36.301	80.0267	79.7709	76.2845	90.0746
P18858	15.0039	53.4797	82.7838	8.0523	26.2963	22.7341	13.6008	6.98477	15.0611	12.0053	9.17877	5.71276	7.20962	10.8316	11.0934	9.38819	5.29795	4.35936	7.03839	5.48903
P18859	30.3194	26.3341	16.549	11.6834	19.257	15.9508	17.4894	14.061	18.5529	10.6806	18.5344	15.917	15.5022	18.6478	12.4191	23.2221	17.0738	16.0999	15.8892	14.291
P18887	26.1222	17.0357	8.44295	18.4784	10.7691	19.2975	12.2564	15.5643	8.26661	8.17904	9.09509	9.49219	4.97854	9.63855	5.96824	11.2489	5.66645	7.76137	7.52418	9.13269
P19013	120.622	22.3335	32.4474	133.698	29.5353	73.5957	55.0381	28.2139	45.2327	49.9678	444.913	308.887	18.479	70.0847	402.417	7.13306	29.145	6.56738	13.0898	6.58769
P19338	393.78	415.94	449.13	396.605	394.028	503.554	322.852	426.85	295.418	503.088	423.833	374.233	556.762	435.246	313.957	409.022	424.149	455.44	419.719	554.368
P19367	22.6832	24.0269	25.8567	17.2484	26.4253	23.4297	16.9005	26.7814	22.3579	30.2278	25.5437	18.8466	21.3781	25.6585	18.9602	12.0662	21.6147	20.6247	17.6402	20.5794
P19388	49.3435	31.0996	10.4638	17.577	15.9758	10.8663	14.243	18.3918	18.5028	13.163	23.3762	19.3089	16.3527	18.7933	19.0208	15.2769	15.4428	22.9558	21.367	16.011
P19404	13.3615	7.50385	13.5147	9.70309	15.6075	19.1473	6.76943	7.30669	9.65874	8.05394	24.7138	13.6069	21.9304	19.7082	17.2788	16.4225	9.37924	10.7362	12.7908	16.1703
P19525	13.7874	19.7996	23.4034	20.2556	19.7679	7.21661	6.78013	9.41973	10.4989	11.5941	11.2342	11.1768	19.8733	12.1281	17.872	16.8776	14.8038	22.2011	15.3915	14.8658
P19623	115.006	128.429	271.791	132.254	183.351	110.501	100.293	112.318	127.111	153.143	178.112	254.674	162.197	155.878	190.524	187.385	204.273	164.12	182.667	198.493
P19784	14.5756	13.8295	14.6387	16.9731	11.4658	9.20427	16.8591	13.3919	17.5928	22.3469	25.3091	17.8053	20.8287	21.6982	19.4809	22.3717	13.2035	19.6277	15.8561	11.608
P19823	789.972	732.244	815.911	208.524	73.363	1172.45	884.828	55.2416	719.263	1056.86	263.004	251.968	534.385	849.546	419.82	440.588	171.807	22.7689	169.156	94.2696
P19827	101.426	94.6897	88.447	26.1817	59.9026	240.049	135.056	14.2449	100.312	204.875	39.1676	65.9757	107.706	165.916	139.853	55.7365	38.5672	11.3011	24.6173	10.1778
P20020	22.1279	13.7731	15.6704	8.63975	10.0385	15.8666	13.1293	9.7603	8.7261	12.1551	11.5144	9.7699	9.49223	9.22227	8.75563	10.1334	8.74277	8.75557	8.712	9.87882
P20042	39.0319	51.3789	50.3725	42.2043	52.8362	60.9238	67.544	55.9967	62.4857	65.9274	42.3098	51.5168	60.1867	66.4767	57.8389	81.8436	54.6642	78.5778	66.4002	63.9976
P20073	47.7332	39.5977	52.015	52.5995	35.4545	28.0877	41.9868	37.6095	33.3861	32.1591	73.6979	71.4294	46.6227	56.9299	62.54	45.8587	72.4868	71.7114	46.9781	53.783
P20290	24.5569	22.1058	13.9363	14.8236	18.0757	20.0134	14.0477	15.2725	15.7211	18.7869	32.6444	23.9245	17.5214	30.1783	32.1962	32.182	32.3724	32.3563	24.1684	26.327
P20338;P61018	11.3653	4.03235	9.55907	12.2482	15.6879	10.6716	13.9356	19.6635	10.2901	13.2162	22.4638	28.1463	15.1057	15.7462	23.661	17.1231	28.2583	21.9668	19.2427	16.3869
P20339	87.1619	75.8797	76.7681	69.1742	101.587	65.5401	51.9631	57.3513	48.0488	80.8983	86.6315	59.5332	62.5711	84.1652	79.5868	92.4006	63.9788	80.9844	72.9932	78.9607
P20340	68.7643	51.6833	48.4144	58.678	55.717	39.8792	35.7997	48.098	47.6713	47.3076	39.0987	35.2343	24.0262	32.1404	29.524	48.3687	36.8423	27.1939	42.0908	28.5105
P20618	80.0245	85.8589	101.343	107.266	61.0873	106.503	101.212	105.467	83.3565	97.005	111.349	147.019	88.4068	109.042	121.496	85.217	150.099	81.7152	84.3973	86.4002
P20645	9.87576	8.74671	11.8547	11.8255	13.7597	8.13393	8.53633	6.91712	9.01278	12.19	8.19308	5.4969	7.40587	7.358	4.52199	9.96482	9.90307	6.26312	6.29421	8.07357
P20674	21.8421	16.8699	8.56377	25.2423	19.461	14.5528	16.6495	13.0602	13.1217	12.0428	36.9256	20.5171	21.1145	15.182	15.5858	31.0999	17.7321	26.3238	19.3527	21.8855
P20700	195.595	187.325	120.911	184.15	132.962	132.392	129.313	155.668	115.775	103.439	117.709	103.677	213.094	139.609	118.121	171.443	132.194	96.2803	116.212	119.839
P20810	36.9493	16.7242	20.1247	18.324	12.7867	43.3576	44.1593	27.3952	26.2313	18.2725	23.0146	19.4284	31.5957	20.5813	22.0648	22.3024	33.641	15.8881	18.4005	17.5396
P20839	30.2794	27.0202	15.9943	22.3114	29.5928	27.5614	22.6251	20.6787	32.7079	26.4605	34.4046	33.2288	23.2552	15.5232	28.1531	30.0047	20.5457	35.5921	22.8339	21.1857
P20930	532.834	234.996	332.876	486.549	162.501	132.412	87.2284	60.3811	99.829	62.7328	516.506	779.212	149.576	162.019	323.942	96.8854	188.261	100.347	51.5467	50.3339
P20962	403.208	354.533	603.111	382.228	469.31	248.497	383.45	323.558	204.998	138.542	92.8766	165.151	201.955	80.0828	183.165	88.7408	206.567	104.958	137.679	148.905
P21127;Q9UQ88	36.9414	37.3883	24.5394	28.032	28.6861	32.454	34.8202	35.1141	41.7367	26.1023	36.3785	32.9765	42.3838	22.1551	26.4221	18.6876	27.7049	29.1744	34.6347	28.8978
P21266	136.851	126.563	382.192	195	263.248	42.9568	100.67	111.887	105.331	74.3252	42.1696	45.4596	36.0372	42.2287	53.8959	36.3896	61.6264	27.657	49.9741	49.474
P21281	35.5242	34.3966	32.2349	26.7759	25.7709	38.7891	20.4913	40.427	23.8175	30.2294	26.5099	18.6722	20.7252	19.4301	18.5029	27.9491	20.9754	23.9868	16.0379	17.6157
P21291	12.6414	32.9191	90.2381	36.0252	131.953	65.616	55.8448	61.7585	49.0339	48.638	61.7018	68.2801	54.4528	87.9901	57.5118	88.6927	57.6545	58.8852	70.4884	85.6052
P21333	375.337	393.082	809.49	520.671	973.72	575.578	457.197	824.897	500.573	638.585	302.065	285.898	305.331	268.057	305.746	279.71	324.987	241.698	296.723	346.521
P21399	10.6379	22.2133	23.1224	10.5857	15.386	13.0034	23.3291	15.2309	15.5921	14.9874	22.9131	31.4035	17.8227	23.732	17.9287	22.8347	29.163	15.0567	24.8659	19.8626
P21796	105.576	45.2579	96.1161	96.3098	118.839	119.981	71.3226	108.501	86.1666	95.2851	126.046	109.894	122.613	122.656	99.4694	122.872	113.905	108.869	141.274	147.711
P21964	35.5922	24.8282	23.5707	19.51	22.6145	16.9663	16.7396	17.5953	12.8392	7.87952	6.30195	12.2948	8.71187	11.357	8.10681	21.0216	11.5133	5.74189	6.61178	7.09576
P22061	40.0449	41.9219	44.6135	38.8794	40.0362	45.3778	62.4543	63.4397	68.1952	54.965	76.8017	85.5929	54.3659	74.4971	80.4279	62.5627	64.522	70.2746	61.7262	66.4833
P22087	38.0093	43.6671	28.6958	33.8947	40.4048	61.8988	27.6782	42.2159	34.9909	44.3973	44.4102	30.9028	30.0913	50.1317	38.4054	35.0264	44.6578	47.5147	45.0654	61.5369
P22102	107.109	191.108	91.3306	90.5965	80.5637	56.9658	121.378	80.5843	127.279	113.88	117.749	136.449	125.566	112.512	142.438	126.351	121.203	103.434	122.735	132.263
P22234	50.2644	65.0587	61.0837	64.3112	79.8475	63.0539	83.6427	68.9913	101.251	76.136	61.8642	59.5762	52.8484	57.279	75.0205	56.092	46.085	48.9196	69.9782	69.1608
P22307	34.2556	22.8414	33.7488	29.3025	46.2689	24.7581	20.4566	33.659	20.0186	28.4955	22.1208	25.3441	25.2432	26.0506	25.3976	24.0607	23.9283	20.5142	23.8168	24.9275
P22314	136.809	155.898	175.149	117.426	136.682	79.7908	130.159	106.759	89.9567	142.907	134.223	192.548	184.015	143.581	167.991	185.593	223.011	143.362	168.574	145.941
P22392	249.025	221.412	429.746	231.33	232.237	244.566	407.011	298.747	361.466	394.845	399.993	494.623	324.413	371.059	399.549	433.423	607.805	432.638	415.516	445.111
P22626	1038.43	1309.22	995.548	998.284	890.028	1063.3	1001.16	1019.23	943.648	1008.59	840.143	708.785	1141.99	915.024	705.121	889.852	808.69	777.596	1025.8	1080.27
P22694	29.5921	32.4786	35.2513	38.1274	45.5209	24.3888	19.4511	41.1735	26.8824	25.3899	21.5193	22.9898	23.4529	21.7379	19.6891	25.3494	25.1113	14.6725	23.8984	17.5763
P22695	19.0732	12.1773	8.70145	10.1025	15.8555	18.1089	7.97038	11.8689	11.1287	8.31255	21.9741	16.6509	14.6841	19.6135	15.0677	15.5147	14.3901	17.0794	16.1318	20.6804
P22735	17.3782	10.1832	6.51711	22.3387	4.48632	9.82748	11.1941	8.49746	3.39356	6.12736	46.5367	54.7677	4.879	13.3047	30.5129	5.89675	11.7912	4.24572	3.18985	3.23104
P23142	52.8503	63.4605	67.6439	18.8279	10.5182	137.042	108.9	8.55028	97.0224	162.292	33.0333	63.9026	68.8707	109.418	110.476	64.8537	24.3837	9.99524	31.4395	8.25324
P23193	65.7824	69.0223	41.0612	49.3945	27.0065	63.4178	35.2994	35.1008	33.8787	34.6618	21.3235	15.5447	21.2787	16.0727	19.7227	23.4506	24.5609	15.5656	18.7409	20.9938
P23246	194.191	175.304	102.46	140.277	133.164	196.406	118.262	156.862	146.077	167.504	153.819	124.988	201.967	147.452	128.325	115.219	116.145	157.659	154.912	152.991
P23258	17.4318	17.0622	17.5728	18.2349	11.0762	19.719	29.4761	25.0001	19.3126	14.1455	20.2121	18.709	19.2441	19.1036	22.1808	19.6008	16.5591	16.4613	19.25	16.9885
P23284	380.846	149.749	367.451	263.509	495.747	474.71	351.88	327.633	322.361	332.635	275.671	307.265	247.65	350.468	286.244	311.359	420.181	352.804	306.557	330.503
P23368	20.7833	15.8498	14.1255	12.4354	9.63901	16.3467	9.80878	12.1525	18.9406	11.8503	10.0201	16.5981	11.7009	10.5652	13.228	9.30778	7.68606	8.92947	11.6079	9.32153
P23381	23.1985	40.7727	19.1647	31.4718	16.6829	17.9504	25.5781	19.1184	16.9963	15.0396	33.6033	27.9044	37.9993	28.0053	30.2013	37.7139	34.7154	20.5529	27.3934	28.4339
P23396	401.585	405.927	435.77	435.161	409.851	314.171	326.486	338.782	298.885	273.991	312.629	389.889	351.106	339.757	370.158	382.405	358.675	410.342	402.224	353.846
P23526	221.884	222.735	222.268	223.219	202.063	173.903	345.024	192.667	357.136	307.34	275.042	330.498	196.582	283.025	276.198	360.522	266.732	265.908	281.837	256.874
P23528	320.423	425.973	618.576	373.185	503.793	235.135	211.112	363.821	216.049	329.036	444.286	527.83	548.165	468.81	520.012	600.36	594.833	446.266	542.258	478.509
P23588	54.2741	61.8856	59.1634	45.2232	41.2482	64.1202	70.5353	54.9535	76.6327	73.2339	65.7236	72.135	83.3018	91.4764	78.7474	95.6807	99.6942	98.5272	104.533	111.508
P23919	44.5556	66.9543	54.9505	51.4123	48.2999	49.1826	47.9588	43.2328	32.7986	53.9893	26.114	24.8381	39.2917	39.181	35.7473	39.8788	46.0892	36.2659	38.3911	38.9601
P23921	40.8261	38.1599	31.2734	50.0261	37.9432	21.6812	61.2471	43.3245	43.1791	36.5234	31.3772	24.2959	27.9369	38.1902	31.5214	27.8374	40.8989	19.9938	34.5907	30.1589
P24390	27.7343	20.3239	25.911	22.1167	23.2512	14.036	25.9246	52.2475	52.1675	12.1758	38.4187	19.2925	26.7478	18.7206	12.7035	44.9554	16.7507	21.7976	31.0848	10.3052
P24534	146.79	184.562	299.389	203.475	320.516	204.211	208.925	244.142	272.864	302.435	163.08	163.641	224.586	238.119	151.36	245.607	233.523	179.145	193.824	253.88
P24539	54.732	22.8182	30.5699	27.3591	27.7483	59.104	17.792	38.0734	36.0702	31.2568	50.8548	27.8682	40.9175	55.1524	43.4063	43.6295	30.1377	41.5814	53.2848	44.9382
P24666	44.4848	42.4688	41.7672	52.2541	36.9175	44.456	62.4585	39.0075	42.4966	42.8525	69.8958	67.1871	52.6145	51.7504	49.6574	69.5147	47.1945	68.4674	33.9666	40.8185
P24752	88.6185	67.1049	43.046	66.5526	46.2602	66.9226	56.5418	36.2427	69.2546	33.7908	72.2516	88.524	109.751	106.652	111.904	70.0787	93.933	91.9442	89.9854	77.2504
P24941	29.0056	28.8877	35.0272	37.71	35.0736	20.7494	23.4198	19.524	26.6658	20.7166	20.1104	24.0051	17.0868	19.21	25.4116	24.2042	24.4823	40.1928	27.9371	24.4467
P25205	115.581	70.371	45.4768	88.1959	60.928	62.6685	64.1124	58.7424	61.9258	50.1074	64.0009	64.0382	66.4493	52.6156	47.6484	70.5059	67.1783	53.7211	67.2749	58.6155
P25311	416.732	166.484	174.708	245.793	82.0454	72.4672	96.8494	36.3041	47.859	44.8136	259.196	751.672	90.1081	84.0661	176.16	93.2122	287.165	167.643	76.4795	52.4154
P25325	24.4241	11.5775	20.46	29.1307	17.3933	16.0635	3.26818	10.388	23.6308	22.8379	17.6328	21.0817	10.8564	17.7731	13.7317	17.3342	23.8066	19.3705	13.1256	13.1209
P25398	83.1474	78.1477	108.802	80.9352	78.5214	144.549	77.3008	98.5742	135.504	86.1242	112.019	139.462	83.2715	73.5639	92.6086	127.963	96.8225	120.244	140.584	63.4557
P25685	37.4074	32.0334	23.7099	32.9621	26.2442	38.471	33.7565	49.3536	36.7052	40.7572	26.2393	27.7881	26.43	31.7452	18.6635	27.4787	24.5103	37.6923	34.273	31.9763
P25705	525.441	329.585	380.18	345.274	376.413	455.982	200.234	320.705	272.747	329.065	411.46	416.416	506.876	521.732	375.198	485.526	355.799	464.543	499.848	471.46
P25786	74.0136	85.6862	99.679	97.6805	65.4449	55.8021	84.2595	75.1476	53.2515	81.4001	90.0746	124.959	84.8487	78.8677	92.5908	84.5678	118.767	51.7656	76.8685	75.6145
P25787	105.942	101.461	120.349	108.962	88.0367	52.8848	59.9882	97.0107	69.2961	80.9126	74.1374	95.8485	76.6591	78.0186	93.0845	70.8633	109.021	60.374	75.4977	56.6652
P25788	62.2885	56.8371	75.0083	56.8231	57.0939	47.288	54.6742	58.987	46.1645	55.2729	72.4468	84.7035	65.34	75.4356	58.5414	62.7728	77.867	39.586	66.2123	49.1945
P25789	150.664	173.33	158.833	232.666	138.442	169.131	188.471	179.914	159.825	163.573	180.617	253.193	199.948	202.176	223.3	211.474	292.991	176.086	179.344	200.549
P26038	160.506	208.358	285.344	246.07	275.635	150.876	188.882	458.227	198.466	248.079	78.2982	82.4005	103.727	74.0556	87.528	81.308	90.83	108.592	90.5112	88.6508
P26196	69.8887	37.1219	23.7188	37.974	30.959	33.7406	33.1409	37.2792	37.3653	37.5787	32.4104	26.2627	18.5621	31.827	35.7318	27.108	27.3259	37.8956	27.734	27.5015
P26358	20.5301	9.89255	10.0094	14.5214	16.2766	22.9032	15.6232	15.3078	21.0282	9.67177	15.0526	16.3793	15.8879	12.0189	15.1776	14.7242	10.7879	18.1617	16.5396	13.8086
P26368	21.3506	58.1169	62.3714	45.4545	41.1947	98.7618	73.7597	67.4192	76.1927	100.783	60.7975	61.3686	55.1645	77.8404	59.2475	48.9815	72.1287	66.0954	76.5523	93.2425
P26373	423.898	421.667	491.296	450.803	459.305	348.3	383.209	459.342	358.146	359.757	352.426	388.917	375.364	350.142	362.793	408.436	369.92	372.605	367.971	347.198
P26440	21.8568	28.11	18.5591	27.4319	13.0787	16.3106	16.6519	11.5075	29.7376	19.3514	33.9926	21.418	24.496	21.4368	24.384	18.7664	26.2778	16.5472	22.7917	25.5269
P26447	419.936	335.339	304.049	408.407	343.91	153.536	376.318	506.163	347.496	227.115	274.681	247.932	311.1	252.035	266.253	293.883	519.067	244.433	329.102	380.223
P26583	71.961	58.5458	32.1484	53.7096	34.778	45.3846	31.8825	28.1147	33.7841	29.0047	33.3846	19.9068	56.6674	51.4286	32.5427	24.3177	37.9019	24.3623	36.8989	63.0125
P26599	163.981	207.311	146.32	157.045	156.115	238.177	146.225	140.016	162.388	163.542	202.686	125.406	120.374	148.596	131.289	163.985	173.897	172.099	179.982	120.352
P26639	172.702	224.819	228.965	207.685	221.297	174.485	280.073	299.377	241.574	330.09	143.375	119.34	250.948	157.258	185.594	184.181	198.018	191.622	166.744	197.647
P26640	38.4319	49.2335	45.1264	38.3926	42.0746	28.8579	42.2918	27.1473	49.9239	33.8892	52.8128	39.3262	66.1216	57.0514	75.2456	73.0687	64.6854	82.8445	65.7686	68.1127
P26641	198.665	172.266	289.385	208.829	358.392	155.762	145.929	190.853	228.944	204.29	138.018	134.173	164.324	234.589	166.215	174.129	131.727	181.812	172.703	229.243
P26885	77.6919	89.089	67.7973	37.9166	39.0095	57.2239	46.3902	90.7209	52.1527	46.7548	45.7222	76.1588	46.0347	52.8784	49.6958	55.8237	21.3243	23.1008	31.0879	29.5146
P27105	50.4834	23.8248	39.072	32.7724	41.0506	25.4843	13.4531	39.0847	22.265	17.1493	31.4289	38.6507	23.5182	30.9847	21.3115	43.3896	32.6084	28.6513	20.3187	33.9546
P27348	81.1847	85.6509	181.424	86.04	104.793	109.99	151.972	117.298	132.522	127.847	58.9125	93.4062	82.0049	73.3114	92.0277	88.7329	76.0967	76.7459	53.4378	73.2627
P27482	85.1219	54.6517	56.8243	55.9161	25.2987	59.9933	63.0562	39.2615	62.215	45.3076	132.419	116.993	58.1575	39.106	56.4141	92.9114	203.134	196.224	42.3335	34.8854
P27635	37.1678	59.2409	55.546	35.3283	54.5823	42.5943	46.5586	50.0254	38.0113	32.4705	30.2003	32.485	29.5959	27.0034	28.8246	35.0808	41.9687	27.1139	32.6502	34.3195
P27694	61.8437	47.3816	32.8265	62.698	29.5503	38.0627	35.1003	41.7131	33.9763	39.1105	39.6623	37.3056	48.9011	39.5341	40.0109	42.4763	44.5105	31.1892	46.0232	37.3552
P27695	113.805	126.149	61.6565	71.4072	109.229	154.553	104.349	92.1295	98.9092	99.0322	63.092	56.2493	112.281	129.824	69.3705	86.6012	114.593	93.1593	112.006	113.529
P27708	53.9304	45.4964	51.535	49.6863	49.2094	38.7424	61.1223	36.7992	51.929	44.4786	58.6335	53.8959	70.8199	53.3871	61.384	64.0315	57.5886	73.936	44.0444	50.1197
P27797	268.462	190.342	300.134	244.31	237.21	530.563	738.14	241.975	421.901	448.365	342.463	375.227	343.008	514.961	326.647	487.365	383.74	449.718	349.765	334.376
P27816	86.9389	62.4275	88.3004	64.2606	95.5534	85.4309	64.9931	73.3447	49.7243	93.9977	50.9118	58.3653	95.3109	78.3675	66.444	84.8899	95.2126	76.1212	72.9835	71.4393
P27824	75.6694	76.5874	88.3829	112.282	93.8509	107.473	114.219	120.551	100.887	62.1272	105.637	109.444	102.121	105.418	107.741	117.394	134.917	105.619	98.9163	107.533
P28066	87.4585	76.1881	101.399	90.7055	55.8093	81.2389	99.7434	97.8383	74.7638	111.794	110.656	113.65	86.5409	79.5681	101.932	88.8085	142.675	96.8364	90.3604	103.857
P28070	61.6011	51.4467	60.3151	68.9679	39.9521	74.37	57.9399	68.2476	50.5604	66.2311	108.135	118.658	67.6157	81.4151	81.287	84.0586	142.844	62.6657	85.8742	69.5997
P28072	191.501	188.739	219.757	246.125	123.03	132.748	167.125	128.938	136.225	177.838	170.504	196.516	148.54	154.814	163.639	165.956	255.41	133.816	141.187	141.763
P28074	53.3198	44.99	64.1669	66.5791	44.0634	58.9282	57.137	42.5384	48.6189	59.7913	65.3145	60.3783	37.7077	44.9245	44.3187	55.4381	70.4261	27.7691	41.645	43.7906
P28340	21.809	18.91	12.5355	16.9055	10.3671	25.9937	17.1249	18.3152	18.9664	11.5266	15.1837	10.0686	11.4629	9.21352	14.1853	10.0691	12.3707	13.7878	15.4429	12.0554
P28482	34.1496	37.646	49.7993	45.6205	44.7454	23.803	34.4589	34.15	36.2389	39.3705	31.501	22.3253	27.9796	28.2316	26.9889	26.1321	25.9146	23.3472	26.2758	22.3927
P28838	9.28202	12.5878	14.5245	14.1062	13.075	20.1258	22.0008	13.3591	17.6111	19.6865	22.7133	25.343	21.099	18.4395	23.0366	19.0081	25.9088	13.0748	20.7098	23.7678
P29144	14.3557	15.0599	17.9538	13.3245	9.14913	15.2541	17.9746	15.8536	13.3108	18.6079	10.5933	12.695	7.99465	11.4155	13.6848	8.79127	13.0323	8.65404	8.32698	8.3602
P29218	60.841	58.0419	33.1372	47.0716	27.6526	17.1134	41.2561	25.2746	12.6772	19.6387	22.7965	25.2134	7.31115	21.3048	19.7095	14.3377	24.2946	13.6841	14.7208	16.6875
P29401	483.755	408.651	498.027	509.891	400.564	467.72	530.453	489.439	277.961	508.177	282.365	346.547	399.109	298.047	334.325	358.674	456.106	254.137	287.733	333.514
P29508	54.5899	20.1948	21.1459	30.2322	8.82432	17.2945	15.6887	9.30583	12.539	18.2328	110.033	54.8484	16.5191	25.9366	58.3311	16.2446	58.2686	50.2183	17.0208	7.83252
P29692	392.072	409.268	681.576	534.948	709.505	498.181	402.489	668.312	660.591	578.36	364.518	344.796	439.499	505.992	324.42	449.115	436.286	465.972	515.873	507.345
P29966	38.9813	13.8474	27.1097	24.282	12.3977	88.9851	42.0497	28.1375	15.555	20.6695	62.5406	95.2907	141.268	56.9493	55.565	68.1911	78.931	32.4051	109.533	77.7364
P30040	150.895	121.684	90.9729	88.4216	120.323	143.752	146.565	166.681	124.585	96.9561	103.307	100.109	120.78	172.531	116.193	83.4086	80.9932	122.218	128.907	119.079
P30041	592.77	505.148	658.658	472.512	571.471	300.643	618.032	560.918	400.109	494.031	714.478	1092.51	872.803	739.361	777.126	909.603	1318.81	728.831	750.563	897.003
P30043	9.9462	25.8834	24.4839	29.4704	19.4956	9.20397	34.7411	23.0513	23.2087	26.2712	32.9745	52.35	44.3604	26.1327	42.6614	50.3176	52.155	26.3077	34.9868	38.6754
P30044	160.856	229.905	206.443	239.202	107.274	139.609	256.931	285.624	243.209	204.189	196.679	278.822	206.516	201.525	223.691	189.734	195.011	162.607	167.563	159.109
P30046	108.397	120.121	155.422	95.7359	110.006	34.3483	101.324	81.435	59.8211	57.3551	38.5054	49.6977	47.2541	53.8174	39.2328	41.309	44.6405	26.3042	45.4358	39.4544
P30048	202.144	253.443	174.975	152.824	130.65	154.911	126.018	151.936	142.039	141.697	149.849	216.509	179.451	187.926	219.172	135.004	198.935	211.666	194.887	191.252
P30049	136.125	64.2379	61.9225	119.92	64.5988	110.52	40.1041	58.8483	44.4973	60.0666	83.4628	65.8826	61.2316	62.9737	59.7788	55.005	42.1295	81.0898	69.554	83.0557
P30050	263.544	275.381	332.18	241.389	242.434	198.809	158.248	170.416	130.404	169.572	189.032	174.073	127.135	176.943	139.966	224.775	203.019	192.709	206.635	184.662
P30084	32.512	52.6356	38.2357	29.0899	28.2203	33.107	42.1506	21.8523	20.4183	26.6132	28.1918	19.0444	26.242	24.294	26.1408	14.3556	21.4512	22.3549	24.5741	26.0484
P30085	49.2853	25.5944	80.9419	65.2094	62.8513	29.8652	41.0558	66.6789	46.3314	63.2644	37.0223	33.9847	52.3689	47.0559	42.8154	47.0348	56.3997	39.8771	44.7976	57.5856
P30086	193.157	196.597	215.822	184.223	123.511	68.7629	182.567	100.833	135.269	141.868	230.024	393.074	162.618	230.419	191.417	165.312	345.284	295.248	148.916	182.02
P30101	262.369	314.937	215.951	230.084	294.264	270.712	292.238	264.722	300.214	249.852	269.527	267.697	278.638	316.644	273.617	274.096	155.502	286.672	296.958	256.777
P30153	96.7267	87.0008	124.635	80.8303	75.8892	86.6064	105.331	113.754	88.5819	102.195	94.1917	73.7113	84.1232	87.5653	105.02	91.6052	85.7607	79.2859	85.6894	92.7289
P30419	38.9451	26.6099	27.63	22.3557	23.4778	23.2446	24.7963	19.0844	30.1442	28.8755	23.5385	22.0047	24.592	31.693	30.6016	31.3763	29.1866	27.2645	29.9109	34.644
P30520	27.5227	38.8217	38.2078	35.6371	31.2891	32.5547	28.2259	36.0715	28.7829	30.1198	32.0199	32.4152	27.9292	31.8986	30.3819	27.858	37.992	29.3384	35.4749	35.9304
P30566	25.8797	37.7	50.9967	30.818	28.7301	15.4912	19.6027	14.4499	11.7285	18.8883	19.7253	29.8154	23.9187	21.5834	25.3277	24.865	23.4841	21.5327	22.6723	23.4876
P30622	30.3898	6.46183	8.22087	8.61584	7.59409	10.3185	10.7305	10.4825	10.5838	6.37126	10.7552	10.5656	8.77487	8.90033	13.7326	9.99083	11.0584	10.1913	8.44524	9.88614
P30626	116.067	104.92	83.8202	82.5569	90.1486	63.1196	88.6341	84.6078	111.363	95.5877	90.6471	68.8881	72.3106	147.407	72.9788	58.6586	63.5011	60.47	75.73	49.2267
P30837	39.8013	42.3996	58.6801	24.5388	100.701	53.6359	34.8266	35.6657	43.2054	28.7376	41.7683	32.7122	18.6132	32.4369	32.7865	16.1992	25.6633	30.81	27.1427	33.6566
P30876	19.9795	19.7859	11.094	15.444	12.5684	13.1108	14.7736	17.2981	15.2746	15.534	19.7173	12.8955	13.4171	11.3321	14.8556	15.4923	16.0108	14.0403	13.3298	12.1901
P31025	69.6045	43.0319	28.5134	42.5348	31.5487	27.5071	17.1777	49.6284	31.2164	16.9174	71.4572	209.81	51.3458	46.5752	41.4651	64.3114	50.2543	40.97	68.4836	38.8554
P31040	69.9284	105.545	60.9613	70.7243	41.6763	56.227	50.3864	48.4342	32.3435	19.4509	69.0566	47.1099	93.3062	42.2702	69.0038	50.1846	60.9587	45.4317	49.307	44.8747
P31150	9.38178	14.7831	31.7129	21.5937	22.0428	13.1671	19.7191	23.6732	17.1523	19.2234	13.8377	13.9252	14.2503	14.938	18.3902	17.7819	17.3732	11.5138	12.0526	13.6333
P31151	106.019	46.3896	21.6523	41.3038	9.79958	22.3025	136.269	31.8337	16.8023	19.9147	61.462	143.661	34.4904	23.0376	81.8587	29.0749	74.6285	69.1793	22.2299	12.6236
P31153	46.8733	75.5515	77.4011	61.8911	64.6013	74.9466	96.7472	65.0049	77.0501	81.314	84.2067	104.506	86.2708	93.2629	90.8291	107.166	113.848	98.1764	95.0387	95.3418
P31327	192.628	226.7	94.9781	130.575	46.962	125.667	163.874	55.8887	129.489	20.5124	319.371	446.791	427.566	298.334	351.983	226.465	367.218	247.995	277.882	307.006
P31483	50.9504	53.4761	42.8177	50.2255	47.2531	41.669	45.2691	38.6098	39.2778	31.1443	39.9281	40.8278	68.3924	34.5153	43.2001	53.1917	26.3984	57.0116	41.1303	38.2855
P31689	33.5144	27.281	40.0993	41.3243	39.9467	51.8611	44.2521	34.4784	61.031	35.1222	30.3379	28.339	26.379	34.1516	31.5342	32.1636	33.9807	32.7563	29.9288	26.2064
P31930	34.8013	32.7809	20.8927	13.3685	22.9983	18.2283	27.4276	19.2379	23.3884	9.21033	27.8042	25.0819	21.3434	21.918	19.6351	17.0167	20.1314	16.208	20.2972	22.3228
P31939	86.5153	145.757	205.627	132.118	119.337	65.1687	123.835	147.685	126.829	166.756	104.729	171.917	149.922	124.898	124.392	114.691	174.96	94.6002	121.863	120.736
P31942	115.337	120.632	104.543	59.2131	82.6498	118.49	90.7641	121.955	95.3415	107.088	97.9869	72.7608	90.9668	110.569	69.0679	88.765	67.5418	103.442	82.2987	115.693
P31943	197.639	186.221	193.166	261.472	179.052	247.005	225.343	325.571	230.787	237.635	200.284	106.089	244.635	187.328	170.894	165.582	138.602	186.423	203.282	218.919
P31944	432.696	159.088	198.774	204.989	72.785	50.8316	59.7526	32.0358	39.7639	34.1753	185.605	839.711	50.5908	118.17	155.41	41.686	233.108	138.528	69.313	35.6883
P31946	357.503	511.76	547.058	413.882	374.015	382.071	515.044	493.939	503.822	540.836	320.007	399.157	297.346	381.71	346.639	386.687	357.912	339.078	319.868	334.788
P31947	39.6432	34.2112	35.1213	69.5158	30.0847	17.4635	48.107	49.2889	39.8925	48.1021	51.7667	67.0864	72.3085	58.7891	50.89	57.7668	96.9475	72.8934	40.8391	50.4451
P31948	205.832	209.627	212.102	218.846	274.503	225.894	222.004	234.12	266.666	273.877	236.851	233.371	244.944	220.008	250.604	282.883	198.559	195.716	236.057	213.607
P31949	113.91	66.0628	202.345	164.001	223.613	113.128	126.987	125.612	102.67	130.31	123.29	130.072	87.6181	120.465	94.4259	129.423	159.138	67.6569	91.8568	81.8281
P32004	25.2638	25.8428	15.859	32.6263	15.8484	21.1766	31.1323	34.4091	23.3005	12.089	39.3308	35.025	18.7678	24.1839	38.6569	39.7396	18.7112	21.9208	26.2767	21.245
P32119	180.255	120.033	101.542	169.463	78.5016	109.196	222.655	119.228	205.483	122.46	272.566	325.834	147.087	221.463	242.757	142.818	242.343	159.172	122.038	129.542
P32969	104.838	87.1648	84.7196	92.375	91.5306	68.801	152.009	122.418	52.8671	114.125	155.346	177.304	135.893	156.705	177.574	150.508	196.163	153.348	166.374	123.026
P33176	41.89	42.2482	56.6067	40.5654	46.1261	42.0231	49.2985	44.7815	38.9702	40.6983	30.3484	28.0189	30.2661	29.257	36.5084	35.1306	37.3104	28.5526	32.8368	28.238
P33240	17.104	27.0325	8.29435	19.6316	17.4381	17.4742	19.4418	16.0384	11.8207	14.7178	22.0786	20.9683	14.988	18.2351	14.9505	16.5981	17.4272	18.5087	23.1002	20.9972
P33316	105.284	119.751	56.2001	82.9487	78.9219	79.9796	90.9687	69.5251	63.0011	65.2411	137.626	148.154	126.041	92.5986	127.487	105.945	183.3	113.002	117.983	97.6759
P33527	27.0663	19.958	16.5316	14.4801	23.2766	17.5212	10.9289	25.6435	16.5782	11.2583	8.33232	6.17862	8.52682	6.57389	6.28728	5.79988	8.07608	7.21582	7.17583	5.10302
P33947	11.7893	10.4388	12.3015	10.2701	10.7279	20.456	12.0177	14.8304	13.0733	7.82487	21.7157	12.1928	11.3603	13.7018	8.75086	20.4323	2.96948	15.0971	10.2968	3.03263
P33991	52.3227	29.291	33.8741	37.7388	27.063	28.4008	30.5056	29.6237	33.546	22.8627	27.4179	28.4927	34.1392	26.7584	28.1386	29.3753	28.8646	23.3274	28.8456	26.5594
P33992	96.0834	62.7045	42.3147	84.537	51.9381	50.215	51.4236	45.1597	66.7323	38.8105	62.8994	59.0622	59.8686	59.5393	54.0462	57.6395	49.4108	52.6709	56.3608	56.3322
P33993	124.779	74.1165	70.4732	131.48	82.4295	61.1534	80.5571	76.4518	87.5494	57.417	67.1908	72.8048	84.0609	76.6292	53.7807	84.8854	66.9317	63.2514	75.9123	66.182
P34896	43.8375	45.392	28.248	42.8596	20.4682	19.5781	43.8762	16.8151	30.3355	24.5548	46.5451	39.8352	39.1569	32.2223	43.6486	32.0194	45.9365	32.6665	40.5778	31.1333
P34897	176.162	333.574	120.338	147.291	114.151	116.21	114.787	102.425	112.542	80.3771	175.43	213.59	188.69	130.975	199.626	106.254	178.352	238.492	158.589	149.163
P34932	62.1471	93.7757	126.397	80.3171	97.0246	108.071	125.837	112.903	124.949	136.907	126.043	157.655	137.291	116.701	110.026	151.536	150.478	111.818	120.891	126.467
P34949	7.15576	7.66185	14.2335	7.31432	3.80368	5.2785	9.57889	3.11275	3.08613	151.25	5.00045	9.39511	7.01503	4.96165	5.65499	8.82488	8.15271	4.77561	6.50474	5.24268
P35030	161.691	46.0396	118.118	118.007	62.8165	64.8249	55.6104	12.9841	23.3221	25.4767	39.8649	35.3507	36.2355	23.6204	27.159	51.3493	43.5145	28.0307	28.3644	14.5482
P35080	31.7296	34.5233	91.442	45.8991	39.8176	26.9909	34.0206	27.8856	28.9489	32.5488	21.3587	37.2296	30.9881	22.0165	25.4589	23.9845	32.3894	18.6076	26.8728	23.3936
P35221	28.8218	33.1659	27.5798	31.4491	37.8932	38.7559	26.0817	33.9441	24.9395	23.4817	20.8453	20.3803	22.8588	15.7642	25.1771	16.6761	15.1475	29.3619	18.1751	14.8743
P35232	170.114	73.8513	133.336	162.122	181.084	221.834	84.5022	95.0609	139.529	126.879	173.553	180.177	189.475	206.99	135.75	187.588	278.11	191.981	190.458	234.628
P35241	390.661	323.082	391.434	478.393	367.36	355.88	363.929	518.198	342.865	364.533	210.574	229.851	227.171	202.813	251.177	269.128	273.221	314.489	268.527	226.009
P35244	18.9344	17.3768	17.8282	21.5563	19.1381	10.7675	16.2819	21.8972	10.478	21.181	20.3384	20.0377	30.3313	28.222	20.5493	21.7981	14.4661	18.0249	27.8476	20.8245
P35249	25.2011	20.0401	21.5237	19.9428	22.4863	19.2274	24.0392	22.428	23.8027	13.5567	23.3795	17.8564	27.3276	23.3762	16.5085	24.5742	18.275	29.7571	27.6473	17.8206
P35250	25.9749	23.3096	15.415	17.3627	19.4552	21.6367	21.6469	20.9888	24.1707	15.6206	16.0265	16.3169	20.1391	19.6641	14.2678	14.3241	13.1243	17.596	16.319	12.5041
P35268	238.55	273.666	282.911	245.664	377.405	249.926	168.407	249.152	280.3	257.7	242.573	217.307	236.964	257.688	194.554	281.299	206.514	348.637	315.318	319.163
P35269	18.0998	8.63889	6.95871	5.26196	9.94752	11.8492	11.9203	8.60551	9.29244	6.0414	8.45496	10.2591	6.11185	7.24822	11.4574	7.11643	4.77787	8.44387	7.56236	6.1854
P35270	19.4554	19.1776	20.9612	26.9511	12.1334	16.0595	16.6053	17.6159	16.1592	19.3825	29.8834	36.2565	35.1131	18.0847	27.468	24.6154	26.0331	26.5859	28.6402	24.3325
P35443	113.588	32.9615	64.7746	2.69069	11.825	93.6667	73.7408	21.3605	70.64	83.1598	9.26161	14.3804	31.0307	31.4227	26.2747	33.8608	8.42563	1.9631	16.567	7.70366
P35527	22876	4194.52	2892.03	15275.4	1884.42	22023.2	17513.6	12114.1	14034.7	14117.1	73549.9	37212.1	1849.75	30237	69933.7	1473.77	3854.46	836.067	1388.21	1236.47
P35573	17.3453	11.8178	18.9918	12.8746	10.8455	22.6315	14.9079	14.4835	25.3521	11.8425	26.0795	25.9289	14.2865	17.6029	23.1804	21.5932	19.7891	15.7661	15.184	15.7168
P35579	139.455	116.615	299.951	194.063	329.792	258.488	195.426	273.617	208.897	138.14	100.402	73.3337	64.5253	76.0913	82.2006	81.4822	90.2329	81.3519	75.586	78.8972
P35580	26.4934	14.1193	20.2395	18.4762	13.4508	47.062	20.8229	30.7482	16.4969	16.8819	17.4032	16.2065	15.4976	15.3422	22.4304	17.5779	16.4054	15.5562	18.6114	16.3687
P35606	71.842	65.3599	60.1405	65.0449	69.5047	61.2381	65.8898	60.8548	66.355	54.3349	68.2311	80.3731	53.5159	70.1798	70.923	72.737	70.855	75.7434	69.0249	55.764
P35610	37.4342	11.912	5.55518	8.47786	12.4057	22.5911	14.0314	6.97886	21.5768	8.48906	30.787	27.7723	21.2714	23.1155	39.7291	33.8793	11.1117	35.4278	24.2188	22.8969
P35613	544.593	227.973	146.466	346.098	417.838	416.695	201.688	354.823	298.488	354.481	269.056	211.476	271.803	262.395	248.7	269.599	251.693	311.859	263.699	297.808
P35637	210.228	250.134	202.072	236.827	221.498	267.449	166.034	259.571	191.756	231.026	194.773	170.171	180.337	155.345	182.208	163.827	111.238	210.779	196.204	211.996
P35658	17.2686	17.639	16.3629	17.5651	16.4135	16.3741	16.7768	13.1352	12.8792	14.5291	11.8447	14.7689	8.35983	9.68075	12.1563	19.0342	11.8739	10.5546	10.5265	10.1679
P35659	50.0711	41.2487	31.2653	30.1629	44.4294	64.6612	34.3987	44.403	48.6612	44.1213	61.8593	31.7616	54.9923	53.7129	44.1779	35.352	41.6493	57.7671	56.6279	64.0146
P35908	46719.6	7271.79	6454.7	164561	5008.96	11627.7	11494.9	5061.38	5192.74	7714.91	40672.1	233821	1617.77	65590	54127	1190.75	13006.5	662.873	1863.59	1293.55
P35998	42.9078	55.1572	61.7063	52.2791	64.8906	54.7162	69.0744	72.0204	65.9731	81.4577	65.1558	71.5103	60.2976	71.6968	65.2996	83.7342	52.6008	68.5213	71.2591	75.789
P36404	22.2734	21.2433	21.9877	22.6421	13.4373	13.7084	18.6287	16.1003	13.9927	16.2668	11.818	19.9879	14.2831	12.1208	15.6172	16.9465	14.8973	13.2805	16.0192	13.92
P36405	18.3253	9.61791	9.51466	8.57155	11.2248	7.71506	12.245	5.88916	13.2869	11.3797	9.38345	9.97824	4.82216	4.83302	9.7142	12.1838	6.89836	7.90994	8.08407	6.19556
P36507	32.1561	25.3857	37.4247	40.0019	48.6516	19.5686	30.8556	25.1311	32.7088	39.045	7.67318	15.6665	9.45988	6.06916	7.94433	12.6056	16.9918	10.476	7.21957	11.1571
P36542	83.2407	51.8951	30.327	59.8709	47.6354	87.8555	66.1402	70.1981	73.1405	74.1316	62.7664	72.9443	84.9948	80.4481	59.8567	68.5583	72.5616	64.8587	80.4493	83.8225
P36543	22.5339	28.2714	18.0657	20.8828	18.8224	19.217	18.7593	23.06	17.7628	18.1377	18.4823	18.4763	19.8243	20.4778	25.3942	18.244	36.0579	14.3935	13.2898	12.5456
P36578	206.729	256.36	278.334	251.054	274.225	263.928	254.131	336.734	258.57	276.28	227.593	219.493	225.681	226.038	236.227	233.001	206.251	238.315	255.914	231.4
P36639	8.0618	11.3839	12.1344	14.8918	5.91292	7.37421	9.58385	11.3362	6.99854	6.53671	14.4365	14.8083	6.09298	9.21633	12.9851	6.73363	11.1464	12.4209	9.11235	7.72725
P36776	23.2722	17.4835	10.4398	16.5353	12.2812	22.9815	19.5859	11.5218	17.1888	17.3126	20.0706	16.6347	16.1003	19.5846	18.0386	16.5401	17.0588	21.7673	19.9069	21.6691
P36871	48.9372	48.8275	62.1777	54.6949	39.6527	36.204	40.0441	45.5129	47.3536	59.4601	45.2865	81.116	53.4556	47.8953	48.922	64.7815	68.5135	25.0797	46.5659	38.7355
P36915	8.43425	20.3219	16.5986	16.4016	16.8145	18.3701	28.866	21.5487	16.0644	21.6398	16.307	9.31972	22.154	19.8736	13.6186	10.7103	15.8976	11.7909	13.5235	19.6149
P36955	323.258	324.266	103.651	46.463	8.54623	232.015	94.1782	85.4414	153.23	346.599	78.695	362.365	83.9564	150.483	421.274	486.901	55.0203	29.5625	212.01	12.6705
P36957	34.1631	31.3703	20.2292	19.2899	21.0555	23.8917	29.3868	14.7864	22.5891	19.9118	13.3846	19.6744	22.3674	21.0175	16.0447	15.8067	23.2605	9.04619	14.3427	14.0043
P37108	60.4305	49.8746	42.1851	38.1661	38.993	30.2846	25.4759	25.7686	22.9214	20.8812	27.1941	30.9726	33.9518	21.7361	21.7468	27.7042	31.9566	28.3602	25.9178	28.7102
P37198	14.2869	2.82386	4.86892	9.59459	12.345	21.8886	16.6683	27.6568	23.9096	19.1457	16.574	10.3781	14.1946	12.7088	19.1163	24.5445	6.90611	8.55812	16.3751	13.2574
P37235	13.979	2.10553	12.443	15.294	14.8168	25.2469	9.5034	14.2886	21.1188	13.656	13.8138	13.671	9.31428	19.8405	12.1826	9.23654	4.92634	13.4468	8.89322	11.6283
P37802	375.17	363.643	581.757	561.93	492.325	400.579	346.516	611.663	306.192	398.349	187.523	212.416	259.172	222.32	226.878	277.341	302.392	199.469	229.945	235.426
P37837	121.637	159.671	225.843	190.706	132.537	102.469	157.512	111.781	98.2393	132.547	129.64	167.852	182.278	137.923	148.463	151.404	259.168	109.537	130.993	122.244
P38117	80.6809	40.2218	113.61	104.148	95.4326	85.3695	76.382	59.0751	77.0388	54.75	103.119	134.57	116.003	99.4288	125.952	75.8625	104.164	84.7132	94.6889	121.106
P38159	114.078	127.223	102.111	76.855	91.6869	109.682	94.3914	110.393	83.6859	114.186	102.912	81.1508	94.5611	73.3885	66.681	87.3811	69.4248	93.1538	81.9549	123.958
P38606	56.0412	46.1122	68.4953	62.8055	62.1717	34.1372	32.3218	41.6299	31.9094	28.8178	41.2967	49.8881	37.9148	32.4299	35.2345	56.4749	34.7625	48.2303	32.4865	34.4145
P38646	288.05	387.266	385.752	242.715	297.486	425.153	240.415	283.748	326.468	253.179	385.749	336.555	466.227	350.708	359.965	311.273	323.035	374.818	351.519	391.27
P38919	148.356	120.336	95.4599	103.893	78.2973	101.21	107.553	125.918	111.244	120.022	128.645	118.21	137.332	155.891	119.646	137.415	128.25	130.702	140.541	152.948
P39019	167.98	257.434	231.522	198.224	267.597	194.473	306.377	278.406	274.021	253.222	230.665	255.632	269.402	261.94	298.385	291.869	270.815	288.812	316.289	290.208
P39023	134.708	142.317	165.147	145.85	150.45	161.658	157.642	168.665	139.275	175.443	145.136	142.675	136.319	159.541	149.43	153.396	152.39	161.189	132.998	152.691
P39656	162.73	108.449	63.136	66.1408	108.324	84.3167	74.3765	85.7568	62.9077	68.474	80.4119	49.9221	64.5288	85.1444	75.369	88.9826	45.0148	69.3987	82.3953	72.2763
P39687	151.631	136.063	127.538	121.264	117.744	44.0551	118.299	62.7318	70.3275	59.3373	111.019	111.619	152.775	104.587	86.8395	121.935	185.211	96.6969	129.583	110.274
P39748	87.7973	62.7192	25.569	79.4831	43.2343	73.6789	53.3304	65.3518	74.5981	43.8529	76.7424	54.2944	66.6934	69.4633	75.6344	48.7757	79.1908	67.8919	78.2969	74.3764
P40121	15.0026	30.0708	14.4041	15.4486	13.3433	9.1047	29.2674	49.0939	25.6817	20.9778	13.7253	15.5368	19.661	22.9913	14.2924	23.026	20.5692	27.0644	13.5447	17.3653
P40222	13.1789	19.3165	21.5106	16.5709	11.1299	6.99212	23.041	10.506	6.71513	11.8549	15.8423	6.71867	10.9734	8.12805	8.23777	14.2139	9.21524	8.15368	13.0991	7.96216
P40227	160.453	198.007	243.966	181.047	246.225	171.867	200.722	186.304	229.37	218.01	224.039	249.824	281.016	258.562	251.362	268.996	206.702	284.007	254.413	315.711
P40261	30.5474	52.697	43.6068	26.5686	42.632	26.5988	56.1073	29.1297	28.8546	33.5821	59.1941	60.8017	34.6542	46.3868	59.2502	71.2811	56.6773	46.7422	50.001	49.0826
P40429	146.509	164.429	181.434	137.573	172.108	151.418	147.44	153.621	126.365	122.469	134.615	158.309	138.427	145.267	130.325	138.039	130.806	101.785	134.765	121.806
P40616	46.5089	77.3787	57.5968	44.8562	55.3365	58.6077	32.6022	16.6065	58.0742	12.0284	38.8406	35.8821	39.4914	58.9887	41.3975	46.2552	39.7518	40.87	42.4433	40.9568
P40763	31.1035	22.4765	11.7595	21.2215	15.6441	14.4553	14.9176	15.6503	16.5068	13.3405	19.4616	19.7918	14.5028	18.2987	19.1771	22.0576	18.4738	15.2599	15.7255	13.7559
P40818	12.8815	15.9004	8.17221	9.81399	8.82805	11.3794	11.205	10.0126	10.209	12.943	7.1437	8.91023	11.5526	6.99733	8.38956	10.2491	9.76388	10.2988	11.0815	7.11151
P40925	293.566	260.344	344.063	312.728	296.105	113.449	411.469	291.385	272.904	297.226	189.126	356.635	408.371	381.171	342.695	315.79	469.06	374.29	273.111	373.032
P40926	180.068	77.2259	194.427	175.626	222.175	206.901	101.312	128.192	183.975	145.358	145.862	191.888	165.147	151.643	181.002	109.417	199.221	177.141	165.984	168.922
P40937	31.0112	24.3074	21.9251	27.4425	21.6285	21.7935	22.288	18.3104	23.0145	18.5638	26.6799	21.2603	28.3852	26.9447	26.599	21.2119	23.7763	24.2043	25.9012	21.6062
P40938	24.932	16.1088	9.91431	14.7704	11.5822	14.6378	15.8461	16.9559	16.0845	10.5489	13.7603	13.1396	14.3152	10.8103	12.1541	16.7327	10.1577	13.9502	14.6374	11.1916
P40939	69.4076	53.2205	26.5993	43.6029	48.1185	44.1259	33.6744	34.5419	35.8495	30.06	56.8395	50.8373	66.7865	51.8533	45.8996	43.0314	50.1667	72.4939	43.6035	51.7979
P41091	69.2959	90.915	94.9246	84.3752	108.867	95.0581	102.372	111.691	81.8835	95.1305	88.547	85.1093	71.5282	99.8653	86.3781	116.078	96.4159	116.376	95.0929	109.044
P41227	38.2097	25.5411	31.1925	23.7055	23.6269	23.6924	27.0768	37.5546	36.4477	38.2049	22.9733	29.0933	30.7438	25.709	27.1204	29.7482	31.4504	37.9529	36.8198	35.8068
P41236	10.2824	13.1478	13.4844	6.27949	12.3111	11.9233	17.1988	5.6365	8.72316	2.9136	9.42624	23.8769	12.75	14.4321	19.248	17.36	15.7053	17.4516	12.347	15.5146
P41240	11.5808	18.3773	13.035	11.0767	12.9908	10.1657	6.12478	8.14504	11.9565	10.1677	11.1802	9.57176	12.9481	14.4299	8.90106	8.98897	17.7002	11.7048	11.0314	8.47573
P41250	62.2253	67.4046	61.0338	62.2216	69.2243	66.4649	77.6077	89.5612	65.6827	86.9901	71.5814	83.9959	137.532	88.03	89.5787	95.1475	118.761	129.472	111.451	91.8885
P41252	70.3452	45.5006	46.1384	45.9772	47.6609	49.1737	68.3879	109.361	54.1677	52.7361	43.6793	45.4232	52.0458	58.7646	58.5318	50.1386	59.3118	53.1671	47.2781	51.1542
P42025	62.0992	33.6966	40.1669	40.4515	34.8638	25.4138	40.138	28.585	45.9259	38.1344	34.2339	30.1206	35.4982	22.3727	24.4284	25.0787	22.6244	23.1353	29.9604	27.5709
P42126	43.6918	60.6254	21.885	32.566	30.9315	23.1102	29.4653	12.9928	33.2215	14.3443	38.9492	36.3483	43.6119	39.8479	46.3528	14.3492	29.2637	36.1019	30.5456	32.3485
P42166	60.5412	63.1588	52.9711	57.8585	32.4639	58.4116	61.8045	48.0333	64.9098	60.2253	68.1951	65.5297	58.0659	67.8454	50.761	70.2872	65.5132	61.5126	52.2848	75.3524
P42167	35.3169	36.0146	24.7385	18.2395	17.103	23.3204	32.4332	14.1325	23.4461	8.48997	26.7973	39.1348	36.5386	54.4932	27.3174	34.186	22.3501	32.108	27.1195	50.0041
P42224	32.2722	39.5507	45.2757	36.2922	45.4406	30.0445	32.7251	29.7443	37.3842	42.6736	30.0643	40.516	46.4163	34.9141	40.0726	29.4559	30.6723	24.3662	30.5133	28.4367
P42285	23.3059	22.2454	19.1261	28.5469	20.8935	27.6219	31.4901	25.0253	28.0112	34.524	19.0003	18.6507	29.605	18.9349	17.6538	18.1151	16.4983	18.4735	21.2721	22.5849
P42330	18.1488	33.1343	179.817	200.413	162.823	15.789	82.5422	430.025	30.7255	251.428	5.48936	3.70087	3.74117	3.1484	5.70315	13.0226	4.04633	4.86918	2.53959	24.3359
P42357	14.4494	5.43287	26.9043	32.0459	2.53291	19.5949	9.27409	4.80685	27.5457	15.577	19.9956	28.8112	8.07732	16.1903	30.9185	15.7827	13.1001	4.75471	5.79571	5.77321
P42677	22.5558	33.102	39.5785	30.2576	38.148	39.8247	41.7055	23.344	39.8652	50.5866	35.1677	50.4261	50.67	48.1346	49.6595	54.416	45.6774	51.0986	55.6982	60.9928
P42704	99.7676	100.719	66.9165	61.2644	85.7754	90.4956	53.9198	62.8779	81.2256	60.7408	192.257	146.224	230.25	158.977	161.16	154.242	117.166	213.894	198.538	179.678
P42765	27.7378	46.8036	59.3143	37.8824	36.8343	28.5335	33.701	28.9457	27.0471	31.5596	34.5466	34.3979	48.7534	42.867	34.4208	20.261	35.9246	31.3643	32.9946	32.6915
P42766	310.351	235.472	303.23	299.29	328.023	251.98	279.299	273.978	231.852	238.817	159.214	284.921	271.901	230.645	274.934	300.092	329.4	299.083	301.625	246.248
P42771	44.7125	45.3279	51.5985	25.6206	82.7115	46.3118	34.0432	32.9457	41.9922	73.1832	27.2066	24.8028	18.0158	22.8481	29.2247	36.66	29.3296	33.4831	22.8749	33.1345
P43034	40.2973	34.6264	40.4764	29.0774	33.0258	28.6833	38.2093	38.7586	31.5798	39.2402	32.5741	32.953	22.8658	33.7287	32.4109	35.187	38.2944	30.3087	28.9535	32.0387
P43121	15.3262	11.1774	24.2455	14.6345	21.2691	20.6208	18.438	9.82379	13.4826	6.07139	7.28812	6.12876	4.82869	4.91101	5.48133	3.3745	11.3867	2.75804	3.53342	3.97529
P43243	118.349	133.075	100.957	94.9139	97.1869	139.959	94.7415	120.053	108.867	108.196	115.752	87.0283	127.257	78.8496	86.046	120.981	99.447	107.926	117.326	124.471
P43246	24.6922	18.7443	13.9076	21.5171	11.7597	16.7543	20.4958	15.3299	15.2745	12.9147	34.0774	31.8336	42.2827	25.6915	26.9437	25.1761	26.5317	30.626	31.5368	28.6948
P43304	28.7264	23.4957	15.8053	22.022	18.1934	19.8996	23.9831	18.2665	22.6109	18.2418	19.6283	18.9226	25.9029	18.7718	19.2283	18.075	26.5667	20.9471	22.3442	17.9135
P43307	149.973	56.9452	56.8655	99.8058	97.6483	134.236	94.6933	87.9371	73.0688	98.7584	115.06	154.472	102.005	110.114	116.308	117.026	119.649	137.106	123.176	107.66
P43487	82.2708	143.074	171.3	128.776	128.078	139.704	142.606	128.293	146.059	172.301	70.9115	80.8576	62.5969	101.589	92.4653	90.3382	73.9491	102.329	69.5858	80.7044
P43490	23.2275	30.3684	40.1098	27.3359	16.5776	18.0539	24.6887	24.1847	29.738	41.1112	25.0226	30.7982	24.8872	19.7285	20.7887	17.8508	16.3797	17.7659	20.6582	14.6419
P43686	42.0411	43.4477	62.1401	38.6258	38.8854	44.7574	41.6885	42.3192	36.4778	52.104	31.9998	36.2537	37.6575	25.726	28.1314	41.4444	35.3922	35.1881	33.117	35.1759
P43897	21.3288	16.9316	13.6928	14.3126	10.6268	23.4195	18.4291	16.6433	22.6108	19.1625	33.2791	32.2185	21.8655	19.0231	20.5137	12.8674	17.1955	23.3264	18.7151	25.0332
P45877	34.6288	37.6065	55.0424	16.8512	22.5089	18.8903	28.0791	48.1887	44.5638	28.5314	13.8109	22.5304	17.9903	16.5095	9.68343	20.689	13.3052	9.82244	10.6374	9.32091
P45880	206.777	55.9295	162.606	109.772	202.367	137.184	68.2547	128.473	83.5481	89.9624	218.649	170.945	173.726	249.424	160.555	177.107	137.204	244.449	219.755	217.037
P45973	21.8154	15.9516	11.5108	15.4459	11.3005	12.7097	16.8008	13.762	10.9556	8.85388	16.1563	11.8868	20.8795	17.1426	12.9078	7.77958	16.0451	12.5893	10.7385	14.5892
P45974	49.238	72.1677	79.4257	57.81	59.6211	41.6982	71.6999	49.7768	54.6394	70.7314	46.5668	43.9458	44.8803	38.1734	47.8579	46.468	36.2304	31.8533	33.1477	34.9574
P46013	29.4027	38.6752	26.0068	35.9215	26.0556	27.8539	53.1104	37.9034	27.8422	32.5017	41.1154	56.015	49.3451	46.9541	44.4814	32.0292	44.3436	30.5804	32.0999	34.9669
P46060	48.6646	68.0079	93.3051	71.3095	83.5758	62.0826	76.4804	71.5245	69.5915	96.7984	52.1511	51.4064	53.0488	78.2778	61.8323	64.1634	55.5452	63.7948	56.2528	67.6875
P46063	31.6902	25.9607	12.8891	24.7101	25.817	24.7527	28.6183	41.0141	26.0719	23.4144	17.6427	18.9113	22.9483	21.6983	17.1902	21.1838	19.8546	14.2444	20.2478	21.6435
P46087	51.4026	71.3786	35.6898	39.4741	45.1286	66.7849	36.0295	40.4769	36.9616	47.892	54.8329	50.0819	57.0296	57.3698	44.7211	56.4901	49.6223	58.0224	59.0979	68.1269
P46108	16.8774	6.93394	18.732	15.1427	12.9115	10.5789	14.7102	6.56604	13.9391	9.44514	6.49548	10.1992	9.78821	6.9	9.34005	10.0782	13.8725	5.93764	7.36152	7.18383
P46109	26.9658	28.4661	38.5816	28.0723	25.1488	11.971	19.2358	24.861	12.8631	20.8279	15.8558	16.7828	12.4127	14.0876	12.2698	14.7785	11.1695	16.7951	11.0454	14.312
P46379	31.8455	27.0615	18.502	17.6498	16.834	25.0865	20.8178	17.0818	20.1985	23.3918	27.4323	23.0555	18.0158	23.2494	23.6078	24.4648	20.9977	21.3796	22.9352	22.494
P46459	27.435	30.4663	29.1485	38.3766	20.7674	18.0304	30.8716	28.0232	30.9971	25.8036	32.0262	35.6834	37.883	37.6343	37.1408	40.8002	27.6253	43.6758	30.4775	31.4436
P46776	329.617	356.455	322.644	339.58	354.124	347.27	344.401	447.803	336.672	329.089	321.834	329.16	311.627	311.541	326.183	366.273	343.121	382.956	325.522	324.683
P46777	58.185	52.2008	71.3273	55.4826	59.9095	65.3824	71.4552	68.354	58.9119	62.0896	59.8931	71.5896	55.3628	56.8112	56.3581	75.4794	71.3861	63.8431	63.593	61.7692
P46778	80.7641	80.8935	169.913	107.531	73.9821	76.7907	122.602	135.196	90.5338	77.3616	55.5311	51.619	63.0485	70.4086	62.0774	63.5253	58.6145	69.4611	69.3063	57.4697
P46779	136.012	162.724	177.057	154.562	167.159	114.735	169.909	172.948	134.654	132.164	138.322	126.61	109.406	115.772	122.777	164.531	132.338	141.076	163.926	139.7
P46781	559.663	564.716	578.115	488.558	607.026	466.842	442.595	567.218	494.471	459.855	478.771	491.143	533.059	495.284	551.816	605.642	565.625	588.771	530.298	505.416
P46782	29.6552	30.8228	25.5923	35.5824	37.7294	32.4448	46.0507	47.026	37.7964	43.0688	47.41	38.411	35.0376	41.6969	42.9582	48.024	34.2888	44.5597	41.0291	40.1683
P46783	38.4954	63.7098	68.7357	68.034	73.3062	62.3929	84.744	104.146	90.0408	90.9551	86.9672	96.9497	110.418	101.212	94.8177	100.759	80.8792	95.0396	103.86	80.0921
P46926	40.6714	59.502	49.5541	55.4619	38.4196	27.5082	33.58	23.8283	27.3506	32.5391	55.8631	63.3619	50.6631	46.81	58.202	58.09	74.7497	39.8384	42.1199	46.2236
P46940	121.146	99.5442	71.6702	113.362	105.913	134.113	102.332	102.199	109.06	88.3276	198.91	152.4	126.916	155.2	141.27	159.618	123.631	206.156	209.719	185.837
P46976	11.4487	10.0348	10.6147	7.07454	16.1228	10.084	5.13056	18.547	4.58587	5.39368	11.7082	18.0826	7.3408	8.79455	8.01171	12.7855	10.8462	10.7338	9.17146	5.48637
P46977	63.124	28.4909	20.986	24.9147	43.1057	59.5973	34.9165	45.8249	42.8724	31.0952	59.4781	33.6336	36.3385	56.1743	51.9443	51.742	29.7627	45.6829	52.037	50.5343
P47712	25.1725	26.4275	32.9053	39.5641	29.558	47.6448	93.8983	16.3964	47.3597	27.1377	22.8955	32.5698	26.9059	10.8343	25.5476	29.5457	19.8766	30.0838	16.6463	13.2629
P47755	32.0915	20.6537	34.3244	19.8148	40.6646	18.1826	19.6421	18.5247	17.2874	19.1692	24.7986	30.0382	13.2295	21.2236	25.3034	25.2308	30.1321	12.4469	27.6381	18.5531
P47756	100.363	65.9406	99.2851	100.008	113.651	79.9766	73.5045	119.708	85.1821	101.528	105.62	99.435	73.7084	80.5398	97.8794	84.5187	93.6979	74.0176	89.902	71.5848
P47895	39.4326	26.4579	36.1098	13.6827	53.3329	30.4346	14.5996	23.9332	19.1041	14.3895	10.7436	6.14923	6.55526	6.59991	9.16133	32.9085	9.93989	8.48063	11.6421	5.13359
P47897	46.2191	52.2589	42.5956	54.3599	58.5453	39.1991	65.4673	41.2949	47.9779	67.6124	57.9521	58.0858	69.3567	67.5693	70.1159	65.9085	65.6257	85.0132	75.4249	77.0334
P47914	225.966	246.657	288.212	246.651	305.586	131.191	115.308	118.511	115.925	143.221	140.189	178.088	145.687	174.497	171.726	181.98	187.42	188.695	179.405	178.204
P47929	275.296	65.9925	124.618	208.397	57.7384	90.0483	73.0269	53.9858	64.1072	74.7148	539.861	210.061	44.2781	69.4896	207.537	62.124	169.472	106.934	33.4643	23.7332
P47985	41.788	23.5503	25.5689	28.4042	26.3581	51.842	24.2736	27.44	33.1631	24.6688	43.8816	37.8563	37.3188	39.6698	28.8847	30.9277	30.0073	34.3967	36.0758	57.6601
P48047	111.192	98.6062	69.7941	63.76	89.9646	83.3309	37.8447	66.1617	65.5748	54.5829	87.3682	57.3029	81.9039	92.208	70.7265	81.5475	63.5465	75.6539	81.5107	91.8492
P48147	19.1039	13.0818	27.4675	14.784	21.3916	25.1708	34.366	14.1805	26.6682	32.2841	23.8154	26.9014	18.92	17.0566	19.7511	26.6404	19.8959	19.2249	19.3879	18.9656
P48163	35.9421	25.8007	69.7527	76.3209	42.7815	27.6303	55.9701	41.6745	39.7827	35.7708	48.0607	60.7556	33.9028	31.4268	53.6236	26.4007	43.4811	24.1865	29.4581	20.6412
P48444	52.9272	63.3703	63.671	60.9387	70.6043	48.743	48.2131	48.091	58.2317	50.3418	47.7609	48.6961	33.2765	45.6753	46.7103	67.9059	48.3637	45.3934	55.6429	44.26
P48506	12.8329	12.8477	35.965	17.633	19.4848	7.62172	12.2891	29.9035	10.4848	39.2659	7.63859	6.19432	20.1219	11.8048	9.57425	9.10044	12.13	8.45202	10.4636	9.84102
P48507	48.4841	19.9865	70.6731	95.8665	76.4487	29.1593	22.3692	48.1837	33.092	60.9535	33.9699	31.0385	34.0054	50.232	43.2041	32.2905	39.3047	46.0748	37.8531	38.8807
P48556	45.4382	45.0296	52.4118	32.8274	39.2069	28.1896	43.2663	47.6381	37.9488	42.8032	38.2917	39.033	43.6418	44.6333	32.6764	40.5989	33.9515	42.2478	41.6111	47.1011
P48637	47.4911	63.0635	53.4961	54.8274	38.8315	29.3553	53.9369	30.5511	33.9691	54.4487	53.8631	72.9444	39.5091	47.2067	56.6051	47.2106	68.8328	46.6666	42.3999	38.9815
P48643	82.6588	123.525	151.355	118.59	176.653	118.846	132.079	119.781	143.758	140.475	179.546	178.933	204.405	200.77	194.636	197.657	153.091	204.392	177.555	228.687
P48651	49.8288	16.8483	11.8614	7.72031	8.4704	69.4202	24.9558	22.8513	22.219	20.3769	18.6779	10.3481	17.1722	23.1695	19.4377	29.9754	11.1829	21.7982	21.1045	15.7931
P48729	13.7254	7.42318	6.98331	9.37547	6.20534	3.69931	3.58583	2.48975	4.53182	2.94294	10.3856	5.83765	3.16619	8.04653	7.31754	6.98398	8.17622	6.46884	5.23906	7.16088
P48735	32.4661	72.9754	26.9883	60.146	27.0074	67.4462	49.7187	38.7656	24.6993	26.0868	53.5876	59.1853	49.879	49.9447	56.2726	50.2815	55.2334	36.2565	50.2671	39.4638
P48739	11.7556	12.5444	10.9729	17.4779	16.6015	6.57411	14.7171	12.8752	12.92	10.7484	10.7922	8.03403	8.56218	11.4078	10.4798	9.69817	14.4429	10.3828	8.3567	5.81888
P48960	9.89153	6.52254	3.41621	3.74628	6.92383	30.5338	17.5781	12.0584	36.1749	8.88782	7.23258	11.455	3.94209	13.7665	6.62042	4.22777	8.03028	7.05121	5.36248	4.27408
P49005	11.5035	7.77148	7.3455	5.62918	9.7568	10.6671	9.57886	8.81382	11.4256	6.05625	13.5799	7.20501	4.99216	5.91176	10.5605	7.36321	4.35772	8.149	7.99925	5.52511
P49006	78.8595	44.8272	23.7082	32.9059	26.0784	48.0237	21.1589	15.2461	17.961	33.8029	34.6365	41.2279	41.9636	16.2048	25.0173	31.6477	20.2761	23.8181	61.9907	23.0673
P49137;Q16644	24.4477	29.2642	31.353	26.8669	26.8418	14.7234	3.33184	10.4209	23.5855	25.7704	36.0301	14.007	15.6468	18.1085	18.0057	9.87479	30.1697	7.14263	16.5445	11.39
P49189	65.3979	59.3343	62.7346	66.2835	34.1233	27.9422	40.1247	23.6336	27.7518	40.8655	91.7416	96.4572	65.949	82.7331	93.4643	54.897	81.6456	49.6833	47.9364	60.7957
P49207	171.217	209.217	235.25	241.954	231.851	198.247	179.166	253.082	192.348	203.055	187.595	162.384	134.178	172.447	180.706	163.297	122.418	157.954	154.438	158.445
P49257	58.0605	60.7891	47.3056	43.4214	51.3249	50.4657	44.3012	50.3496	47.7273	47.7062	61.1377	73.7458	69.7548	73.9893	48.3522	79.7563	56.1446	60.1122	64.5488	52.7723
P49321	169.223	116.802	123.073	142.954	89.9494	123.768	112.707	101.04	98.839	162.846	109.904	131.315	185.065	133.96	107.285	124.836	146.432	68.1247	113.756	126.759
P49327	126.199	150.541	158.221	233.239	92.584	86.1149	182.304	227.505	185.044	138.145	197.256	217.406	245.482	181.717	369.366	206.954	265.219	204.744	315.574	203.107
P49368	53.3791	55.517	61.6901	63.314	70.7419	68.7395	81.6015	73.4378	82.0512	75.0025	76.4661	78.8582	75.7048	80.6978	88.5636	82.8016	82.4779	85.5282	76.1849	103.014
P49406	15.3466	17.6584	14.7416	21.2745	12.6075	38.4015	8.44504	16.0219	17.1262	11.8655	20.2712	12.1097	18.4237	22.7336	14.2173	20.3842	11.6494	16.7963	24.0077	19.7061
P49411	263.607	434.716	234.331	212.338	208.772	275.149	247.303	163.324	281.564	248.626	288.169	291.696	283.874	261.746	269.063	171.151	310.439	316.073	260.297	287.536
P49419	44.6645	86.8104	37.1785	47.7433	31.4412	29.4513	49.1411	24.9865	50.0928	31.8922	48.8151	67.6361	61.1478	48.5898	55.074	35.0303	66.4282	30.9908	45.4425	36.9493
P49458	90.8551	72.812	61.1292	62.2941	77.8354	49.1492	42.8482	64.0604	43.1557	57.2217	35.3799	31.2553	48.1385	37.8977	43.8735	37.5434	38.1844	43.059	38.6973	39.2199
P49459	21.7154	24.5234	40.7535	35.541	43.4235	32.8803	37.0322	40.7545	29.3722	38.5265	16.4796	27.8732	21.1715	17.4794	20.5984	30.7354	25.698	22.8829	31.163	21.3003
P49588	44.0173	56.685	34.9622	51.6035	29.3541	31.7436	57.086	57.791	40.4678	31.0474	44.8598	41.0327	60.0124	41.0074	52.0177	47.7239	41.5181	61.3342	49.6092	40.5345
P49591	16.782	17.605	16.2465	23.0087	34.0881	32.2756	18.3065	49.7441	21.8919	25.2751	18.7914	16.9708	19.5781	18.728	19.7065	17.2266	23.5373	16.8146	16.9529	16.6614
P49720	23.4511	25.585	21.6779	18.7624	15.0596	16.5889	18.7885	10.1517	13.3841	15.8345	12.9677	20.0403	13.4147	11.8313	13.8442	18.5482	21.171	12.3167	11.4848	10.9143
P49721	96.5837	88.857	108.124	171.351	86.3084	113.283	127.125	116.28	118.778	126.224	207.254	184.868	119.55	161.343	165.878	136.725	221.765	121.113	122.013	140.675
P49736	96.6451	70.1751	48.1647	99.5296	62.584	81.6139	75.9385	64.0246	79.3868	57.7713	63.0971	59.4771	74.8149	54.5098	49.3674	61.9881	57.6442	49.2463	58.8526	64.5098
P49748	40.4487	33.134	20.4642	31.4632	27.1256	24.2297	23.9145	16.0468	27.7464	16.8662	44.6205	42.3606	33.7236	42.8037	47.2795	49.2992	59.4222	38.4807	48.7547	50.053
P49755	41.4151	32.6895	29.9918	33.0777	23.8926	39.6695	34.442	28.6584	24.1836	20.3474	46.735	31.8367	44.7594	39.9379	28.5469	46.7339	26.0977	33.5312	37.7998	35.899
P49756	33.8512	13.3013	17.8219	13.2813	19.2994	29.1863	23.5664	12.6407	10.5491	20.0635	28.9299	8.88594	11.4487	9.63277	10.2317	6.66056	7.1646	5.92548	8.42336	10.6179
P49773	25.5486	25.6099	33.1972	22.3908	30.5659	10.3785	26.0379	20.8955	28.1988	22.8063	18.1629	19.2679	12.5506	12.0894	13.4581	13.8467	16.9704	10.6553	11.9217	12.761
P49790	14.5082	18.7782	12.0174	14.1003	8.62403	17.994	13.4749	11.9442	14.0474	10.6851	14.2832	13.7084	13.0816	9.32159	10.3655	16.5044	12.0057	12.2166	13.5738	14.1982
P49792	15.5845	18.4652	16.5352	17.3408	14.9617	27.646	21.6175	20.6991	18.2336	15.5605	26.0786	20.2297	26.2617	18.4455	20.4832	28.4895	21.0583	27.9332	20.8006	17.4901
P49821	13.4148	6.10207	6.22437	6.7557	8.11867	12.8302	13.7943	9.17227	10.2252	7.70692	15.3669	17.3244	15.9244	13.601	12.9145	11.1622	17.9988	11.669	13.3306	12.7825
P49903	9.48315	9.94881	16.4949	12.5859	8.16682	10.5426	10.8543	7.23246	8.64644	7.78418	6.06076	7.02381	6.36427	5.16925	7.42262	6.71253	4.7524	5.41865	5.45747	6.48473
P49915	35.7051	33.7618	48.804	39.5276	36.8114	53.6203	42.7343	31.3506	41.0975	39.4364	63.3664	62.9431	64.1106	66.7402	47.1979	65.9024	60.2418	61.1803	67.7107	69.7179
P49916	11.2021	7.83303	3.66627	11.6906	4.03644	10.5967	8.17132	8.93206	10.3422	6.24226	10.559	10.7317	8.65705	6.58631	10.6563	11.1279	8.15261	6.99347	6.50044	7.54897
P49959	15.9294	15.5915	15.75	21.1158	14.7024	18.0783	18.2725	14.7422	15.6176	14.4888	14.4082	16.4147	15.9359	12.9305	12.8585	18.0027	14.2378	11.3484	13.3991	10.7212
P50213	41.2461	52.4176	38.3728	42.0005	36.9121	53.0614	43.7006	28.4661	48.0065	39.5542	51.6368	48.5117	35.3455	28.4103	43.1135	26.1646	43.68	31.6659	38.3752	39.6694
P50238	525.186	418.924	215.078	515.113	106.572	23.0581	190.276	455.6	175.309	79.6165	97.0482	141.414	85.9993	17.2315	121.144	114.046	112.886	107.779	78.3805	100.592
P50395	130.837	107.538	144.61	154.874	148.671	100.013	133.617	125.409	143.306	170.462	143.542	121.723	130.939	144.71	143.755	139.068	204.575	124.169	135.068	132.293
P50402	22.7556	26.5969	29.8041	31.5154	23.7347	26.2428	13.5364	19.8491	17.0481	30.5625	38.538	33.1336	24.1397	23.862	20.7514	37.1357	26.3461	26.4745	31.6792	35.1671
P50416	20.9979	12.9089	10.6623	14.6788	24.7195	30.1001	11.0204	30.7505	18.3754	18.4631	27.2843	14.721	21.7479	27.6259	21.4982	26.3168	29.3437	20.3947	30.3773	16.2307
P50454	81.7501	96.3927	134.875	62.2716	211.939	84.7661	25.1193	35.3885	35.0536	48.5669	30.5615	30.9565	28.2472	45.4683	34.5079	31.0936	17.8352	15.0712	26.1872	35.8991
P50502	45.569	53.9882	43.87	59.3051	94.8407	38.3691	49.5585	65.4745	49.137	45.8814	44.0959	49.1874	32.1645	43.0723	48.7776	48.7129	36.4241	63.9194	41.1685	56.6217
P50552	24.7115	34.3694	38.6068	16.219	55.0873	28.5778	15.3759	42.4228	23.532	31.8198	16.1905	16.8366	17.0593	17.8137	22.2357	21.5872	12.4085	13.9857	15.0688	13.4527
P50570	33.4639	28.4147	32.1544	34.5264	37.9012	22.5537	31.0998	36.8346	34.2861	28.479	23.0914	22.5762	27.6533	30.9403	25.593	25.1455	30.2014	28.2442	29.4292	28.1605
P50579	12.1878	5.9472	8.19737	6.12649	7.86273	14.4403	19.7453	16.718	21.5989	15.6674	18.862	18.4339	17.8831	17.1052	21.3889	11.1529	11.7375	18.0293	8.90595	18.9901
P50914	79.2565	72.433	70.6562	64.669	70.0138	59.5258	60.9735	62.2787	56.3223	63.5555	49.5879	51.4405	43.9139	59.2508	57.7834	58.7229	52.6345	60.4763	53.7419	54.63
P50990	154.89	195.609	247.054	192.436	254.52	169.827	256.947	213.865	258.539	248.692	266.274	249.628	272.055	273.981	286.274	308.651	246.489	267.746	264.209	342.404
P50991	131.728	174.801	184.048	163.193	208.209	178.111	190.826	172.497	203.99	195.158	186.465	192.449	236.852	211.455	192.752	263.579	169.065	234.435	200.542	227.657
P50995	51.0935	41.3155	30.2375	28.1828	25.5077	20.3071	18.7041	31.9856	27.1317	23.0532	50.2036	52.689	21.6506	26.3487	32.6568	45.8016	41.1496	49.4126	34.143	26.0712
P51003	8.88835	16.5985	10.1245	13.3272	7.56266	9.66085	13.4267	16.5821	11.7937	11.9223	11.5831	9.78282	11.3298	10.7598	9.15321	13.4325	14.0172	7.14948	11.4375	8.10628
P51114	47.7362	36.4405	44.9751	36.233	45.3881	43.5894	39.964	40.0958	33.5765	24.798	38.5997	35.5613	40.0571	40.574	35.0698	45.521	38.5089	46.9789	46.4415	46.275
P51148	37.1272	40.0355	50.281	24.8308	49.9286	32.1159	29.8261	48.0984	44.6365	43.3396	38.6583	35.1252	38.5707	41.0989	31.7526	36.5017	31.0217	40.0846	36.9234	42.1285
P51149	108.819	124.448	159.603	124.942	198.656	155.006	84.4063	127.652	124.86	114.937	117.516	94.358	119.913	127.28	124.477	152.595	167.286	179.585	119.85	124.922
P51153	37.5565	43.0527	32.0093	28.9581	42.5883	34.9318	32.756	20.9199	31.5847	30.6443	44.1707	39.7082	58.1127	47.7196	41.8501	63.8997	48.6765	54.2965	47.8306	49.912
P51398	11.3736	8.83607	11.9245	12.0544	9.25964	10.6725	21.0321	11.2177	7.24501	13.5185	15.9189	13.8452	9.48097	7.34026	7.2932	7.58751	8.65504	10.068	10.4368	12.5498
P51452	13.8116	22.9032	35.0484	18.0577	20.6811	5.9728	9.10478	15.2624	12.2784	16.673	14.2496	16.0202	6.07291	16.6403	12.1092	11.8228	7.82763	8.78512	10.0919	8.31238
P51532	23.369	17.1041	10.1415	12.9482	15.9369	19.8504	14.5532	16.5758	17.2836	15.8159	13.8805	11.252	14.648	11.7958	14.7429	10.0822	10.3547	13.1476	11.4693	11.7145
P51571	62.3162	31.2558	29.8818	36.0632	48.2749	53.6333	27.7688	47.1488	30.0478	33.061	60.7688	44.3625	44.8226	58.797	50.4564	50.5912	28.222	52.3435	56.75	52.9074
P51572	34.7862	22.2749	26.438	25.8504	26.293	28.8943	22.6615	55.3634	20.7995	18.2202	41.609	25.1354	36.0933	28.5197	30.2462	40.5322	26.6066	37.3	32.9749	28.87
P51610	25.8579	22.7808	15.1078	14.6537	11.8652	19.6465	15.6886	19.7787	11.0123	18.671	11.7755	14.3724	8.6558	10.6557	12.5114	15.3178	13.2523	14.8871	15.4537	13.3716
P51648	19.3519	14.7663	13.8164	34.5623	21.1145	16.1921	13.8488	39.6919	27.8513	24.609	18.0294	16.3371	5.95361	9.49441	11.589	5.44141	8.65068	7.39494	6.3701	7.77305
P51659	41.2007	29.0269	30.3888	42.1085	33.3326	54.1143	26.8944	43.4626	32.2645	47.7531	41.7548	48.0079	44.7748	41.7338	41.6558	49.694	48.6474	38.7049	39.8974	36.3957
P51665	30.2967	24.3588	25.6374	35.4102	35.3403	37.5094	40.5087	42.2288	30.4845	49.0781	32.4801	39.4374	48.354	49.9913	46.5268	46.0101	37.242	44.2919	45.7515	41.9335
P51692	23.6333	5.81094	10.3592	12.219	6.8132	9.61185	12.756	11.807	13.0163	4.54811	13.8114	16.937	11.3199	13.1728	11.7552	22.8025	12.5286	7.96048	14.8446	12.4627
P51812	25.1373	25.4196	21.7157	17.5481	18.2374	16.1271	32.424	38.3756	27.1066	28.2791	34.1555	20.6028	25.2652	20.6951	29.3811	31.8746	38.9811	20.4709	24.141	23.2949
P51858	98.7036	83.7469	92.1789	102.963	80.3206	203.989	123.073	109.5	131.052	93.8825	87.2715	104.52	137.477	115.943	101.079	88.7184	101.414	98.245	108.456	112.316
P51884	48.9647	71.9513	100.356	25.6638	19.1533	159.545	133.469	29.246	122.912	153.395	24.1935	41.9321	82.4821	130.62	41.7757	71.9275	15.6813	13.8579	22.1401	13.3936
P51991	75.4662	85.2198	68.5861	62.916	60.5593	74.6541	65.8	83.3505	74.8455	92.7613	79.1306	69.9188	87.5949	77.081	67.0982	47.4014	66.1065	66.3822	67.5673	86.8421
P52209	153.971	238.064	437.603	409.74	304.185	108.778	244.028	277.316	138.376	248.46	155.868	178.824	204.584	145.101	175.572	162.302	216.694	119.077	185.51	146.807
P52272	209.956	162.019	129.309	166.521	154.928	180.362	136.774	175.157	177.894	162.43	198.295	165.596	207.989	158.658	184.479	233.502	158.446	216.316	212.865	205.019
P52292	47.2898	210.253	161.564	168.498	152.529	74.962	249.466	161.385	187.168	169.237	135.458	147.154	167.922	179.586	194.681	240.296	143.749	138.723	150.644	173.626
P52294	3.80397	8.32037	5.15931	5.39508	7.8887	6.20627	4.17241	5.48792	4.95255	7.88499	8.69423	5.06193	7.92614	5.96126	7.0539	5.27978	9.91209	4.91296	6.91406	6.8145
P52306	14.1995	12.2321	21.8508	15.6449	22.9095	12.0506	19.9087	16.9335	20.1358	19.2377	12.462	8.54352	7.76903	7.45973	9.80278	6.79284	11.7351	7.32787	9.1881	7.40303
P52434	17.2769	7.63753	11.2835	11.2261	8.34029	19.1697	21.7412	15.4379	11.8881	10.341	14.3873	14.7345	14.5261	9.32057	11.9299	11.2097	15.5713	19.1972	18.7111	17.6149
P52564	14.467	11.899	10.4385	10.9633	5.58004	40.0195	14.2166	62.605	16.1244	9.32852	18.5866	15.6359	6.03223	17.2271	18.9499	21.2792	12.0764	18.8004	16.0965	16.9702
P52565	120.326	68.936	163.578	103.146	123.518	69.8625	142.18	85.3228	91.8967	158.014	136.235	110.68	103.596	123.49	113.828	118.49	149.042	83.8013	101.038	118.403
P52597	54.5878	39.3622	37.3167	40.6916	29.4301	26.1009	27.2735	17.705	22.6457	17.8014	25.2754	26.6588	35.0419	20.6418	23.8838	34.9633	28.1	42.9766	30.5615	39.7734
P52701	11.1473	11.9504	8.71942	15.7852	10.5877	18.0717	22.1533	10.359	20.8722	9.92803	31.6435	22.4813	30.0862	23.7242	21.6968	27.5382	24.0381	29.3157	25.3231	30.3253
P52732	17.6782	37.9677	23.0751	25.4404	17.3449	9.90687	29.4031	19.5572	18.4226	20.5191	15.8385	23.9939	26.382	21.9109	19.5795	29.7081	24.1593	22.7703	19.9846	13.1861
P52788	21.5392	26.4876	50.1718	20.8009	36.5655	31.5851	55.4171	43.0711	61.821	56.9376	28.9127	42.1146	32.5836	34.0481	34.2764	37.3126	37.9575	22.8138	35.9722	28.5539
P52789	16.7064	18.6811	21.5479	19.3085	19.8717	11.9397	12.1693	12.2211	14.0617	10.8214	21.3861	15.0778	23.1148	19.84	20.5357	12.7952	18.49	18.4721	15.3337	20.8147
P52815	87.4306	67.7018	63.3263	47.8182	45.1547	79.7978	31.8771	37.7806	37.5404	46.8332	62.4098	56.7896	55.6548	59.6895	53.8701	63.1133	38.6249	63.6397	71.6468	66.5047
P52888	26.4102	28.1297	31.2755	22.5528	18.3475	28.49	34.6486	33.3788	29.652	23.1227	31.7697	38.0091	24.2439	25.4056	24.4781	30.293	37.2624	24.8489	24.5608	21.9123
P52907	88.0876	57.9046	93.0153	86.7535	95.1585	59.9903	68.0853	108.462	79.953	103.93	125.997	144.316	117.58	144.612	140.565	113.379	149.56	95.5727	119.749	113.484
P52948	24.0553	25.3903	13.1592	19.5929	17.1958	28.5599	18.2505	15.1461	18.5546	21.3596	20.0426	13.0108	17.0998	17.7975	14.9609	22.7593	12.3769	10.9619	15.2447	10.5276
P53004	11.1731	23.0453	33.4794	63.0789	24.9715	25.1002	28.2287	38.4971	27.7942	30.4043	22.2364	32.8392	36.5974	35.3006	46.8398	43.1626	64.2174	27.6177	40.6182	27.1479
P53367	15.7663	15.7168	18.5988	12.2167	14.4032	7.92424	15.1093	9.7637	11.6384	13.2583	8.76302	10.7097	7.67355	7.21975	9.60901	8.75976	6.59515	5.03354	5.1435	9.73613
P53396	238.692	407.029	659.696	439.376	360.274	145.114	311.194	319.17	353.233	204.874	171.07	186.588	182.129	155.32	219.318	198.799	169.234	165.581	220.443	170.878
P53582	14.0877	9.99037	8.17273	6.9443	5.22385	6.53839	13.1607	3.44766	7.2486	11.3778	5.32507	5.77758	4.90258	4.91121	5.67066	6.49606	10.3065	3.98512	5.30334	5.11401
P53597	33.1572	52.2917	54.6833	37.7839	25.8821	22.9774	17.3288	25.0824	15.4011	12.0184	39.7287	27.2989	29.7555	21.417	26.2546	17.0943	26.4249	22.0503	24.2632	26.8646
P53618	33.129	42.5663	50.2729	52.0923	49.7347	47.4467	56.8109	50.0406	72.8699	44.3278	43.3457	40.4809	43.3547	48.3076	48.671	49.7541	40.5606	40.6928	49.0295	40.6297
P53621	91.8476	98.4047	87.4863	95.2477	100.622	66.9517	77.7051	79.4846	72.8235	51.7219	70.5308	74.5711	73.7993	71.9018	74.9991	97.2859	79.8373	90.2958	93.539	76.6328
P53634	59.2565	46.5676	19.9617	17.5838	14.484	13.522	2.5419	10.6899	9.94242	12.1805	25.0035	31.072	17.2703	18.4739	23.4173	3.83923	22.8561	14.5724	13.1624	5.57704
P53680	44.2355	32.1465	26.7229	23.6395	33.0604	34.6487	32.9196	40.6892	26.3518	23.08	37.3088	28.6596	27.2196	39.5791	35.4786	38.6843	50.1651	19.6616	44.0715	38.1564
P53985	26.2382	12.5437	9.45589	10.3775	13.6069	19.5808	17.6672	21.1553	14.3189	20.5869	19.3429	15.8179	19.5949	9.51844	16.012	8.76691	14.7098	10.7354	10.2124	14.6061
P53990	26.6945	23.8743	18.3546	16.9983	14.326	18.4394	30.9434	13.9683	20.1287	17.3154	23.5087	21.1506	21.5746	18.611	17.3298	29.3294	13.2539	24.4059	17.3606	15.4999
P53992	31.1553	38.9837	27.8234	31.1663	26.3232	22.5318	33.086	19.5282	22.5894	20.6414	25.585	28.0186	28.1446	23.3531	21.07	32.1413	27.7957	39.9499	35.4044	24.937
P53999	217.389	271.88	206.127	245.014	217.376	446.902	427.93	394.011	297.572	418.561	136.432	90.5074	170.579	90.8941	110.721	126.473	202.336	154.487	134.107	164.72
P54105	15.6503	23.3633	13.2039	7.44469	17.7863	14.1138	21.326	17.5874	17.477	18.7555	17.1967	19.6265	13.4718	22.7302	14.0915	16.6854	12.7969	12.2651	15.3019	18.3562
P54132	33.4633	34.8172	26.0626	24.3788	21.6905	21.956	21.8315	25.3156	19.9379	19.0272	29.7699	14.9649	16.9193	13.883	9.86883	21.7072	12.0739	17.6743	15.3516	13.3585
P54136	67.4964	83.4967	75.0134	79.9811	85.7258	84.4254	89.6315	91.9178	100.28	98.8964	76.1908	63.5033	92.6059	84.0203	88.3868	97.6296	94.9353	106.419	97.9348	100.884
P54577	72.7089	64.557	60.5465	67.6178	72.727	53.5376	73.8591	94.7897	51.014	72.4022	54.0089	37.3601	87.0318	60.8216	66.9687	65.281	60.2299	63.0518	63.8271	75.6689
P54578	22.7722	23.8189	22.413	21.5821	27.0046	15.1853	23.2913	21.3325	18.081	21.5789	17.2674	15.2202	20.9238	18.3212	20.8639	21.7123	18.7772	20.582	18.6433	23.1204
P54619	6.65831	8.24317	11.6557	11.2519	6.5334	7.00802	8.91908	3.06602	2.59956	4.80383	16.4601	8.7512	6.35366	14.1769	14.9778	10.8801	8.49891	8.01659	12.3942	14.3911
P54709	65.3886	27.6428	16.8948	50.624	53.3311	32.3398	8.34175	14.4799	10.5549	20.6491	42.0592	26.2189	16.3146	26.9227	30.1541	40.3487	25.5358	39.1034	26.8276	33.7368
P54725	18.3484	17.2941	29.7742	21.6137	19.0964	33.5011	24.3505	20.7188	25.0927	24.4532	19.0416	18.6861	19.1317	18.6974	18.9024	23.4905	17.2942	13.1503	22.5068	21.0439
P54727	70.9916	58.5226	102.833	82.5465	81.3931	101.488	100.719	103.778	89.3811	87.6325	81.6345	107.479	81.3608	95.7726	89.1152	89.0948	82.0321	70.8941	70.7915	96.9238
P54819	91.1353	102.69	72.5833	81.6401	65.4562	109.115	70.6267	83.9533	77.4822	75.7288	111.903	81.9898	134.629	98.5041	100.346	101.848	117.156	82.2929	102.011	109.121
P54886	54.4589	55.3816	40.8243	41.6723	47.0961	67.1659	25.8882	32.8643	45.4768	31.8202	74.3865	81.5205	69.0095	71.5527	59.0693	41.8212	51.0646	92.8631	72.0697	67.1758
P54920	20.3671	16.0965	33.3189	22.9411	22.7268	24.9437	29.8293	20.9812	29.6541	28.6614	14.5087	15.8726	15.9109	16.3855	14.0588	20.4291	11.9504	13.9051	15.8256	16.2968
P55010	64.2443	54.3444	82.186	45.0556	70.7979	50.539	46.4402	51.1631	42.9834	61.7196	44.592	42.0562	61.5353	63.4639	42.1573	47.6877	34.2471	31.1591	51.9663	52.008
P55036	43.6492	45.5899	60.9787	46.7864	51.5867	49.3166	51.4511	52.309	60.5656	59.5285	51.7776	53.7882	62.0126	54.0964	57.9163	62.8245	53.6056	48.4008	46.2942	53.4626
P55039	20.2423	19.6679	18.7874	15.9284	16.9261	18.2349	21.4786	31.1015	27.2167	18.9568	20.5113	17.4381	14.9318	19.1656	22.7213	24.6599	19.4166	20.6061	20.8501	22.1627
P55060	77.6239	151.215	77.2775	89.3267	67.8514	113.172	169.317	101.442	149.164	171.021	126.209	111.984	106.867	114.099	105.684	151.348	94.3439	139.431	118.882	118.138
P55072	454.688	393.847	509.845	503.876	381.784	551.948	635.853	292.148	605.176	486.835	332.03	362.335	272.796	352.683	315.791	349.496	312.182	301.517	279.57	346.921
P55084	55.2309	53.505	33.1206	40.4972	51.3323	55.6737	40.8137	43.6697	47.461	34.5804	59.6943	46.3365	70.5115	56.9715	47.576	52.3128	50.1648	77.4733	42.3745	68.9228
P55145	22.6665	20.5266	20.4519	27.9246	17.7087	20.0517	18.1847	6.70683	11.4073	19.6605	19.2639	13.1216	20.0116	23.3424	19.3917	20.1852	16.9007	21.0829	27.5923	18.3984
P55209	61.9263	63.9667	144.278	55.4748	67.9962	70.2195	98.7064	68.7574	112.686	97.9535	58.4358	64.2824	84.3958	82.1481	74.8087	86.394	85.2852	84.3129	70.7768	74.9274
P55263	39.2336	35.5302	54.214	34.0781	46.256	25.3844	35.152	25.2375	30.0053	36.2415	40.3341	56.685	52.7364	44.7326	41.545	62.566	79.0569	42.652	47.4751	46.4653
P55265	28.36	19.366	23.2745	25.6335	22.0945	40.3496	25.964	12.6559	16.618	17.2934	26.1819	19.7467	32.0782	19.6281	23.0086	26.742	21.2639	26.6201	24.3332	19.6315
P55327	76.3817	86.8139	50.7681	70.2631	73.3956	52.1162	65.5302	70.8897	45.7345	40.6014	57.4235	55.3776	30.5169	34.7326	54.5124	69.24	51.5901	43.5212	48.2718	50.2892
P55735	47.7951	40.9051	29.8932	37.4551	31.239	15.3446	31.3978	22.0364	21.0914	40.6938	59.4354	54.0999	38.8156	53.7766	36.8304	56.7639	52.9873	44.3199	45.736	41.8161
P55769	23.8022	20.2723	17.7685	29.7637	29.8379	65.1369	28.1908	29.2224	27.0064	24.1215	29.436	16.0557	29.0736	27.8191	24.6936	37.2307	27.4362	34.2651	31.3749	34.7656
P55786	70.7068	89.7255	90.0847	94.4919	46.7634	32.6907	79.212	62.3757	66.55	58.4606	102.522	108.922	64.241	75.7041	91.1252	96.9027	102.563	66.606	69.51	70.1136
P55795	21.0917	37.0923	17.7766	15.9086	12.3625	22.6295	19.6282	26.734	24.5441	25.1395	7.89211	9.40661	12.5831	18.0695	11.7255	22.118	10.2386	9.18045	11.8447	11.5176
P55809	53.9747	55.3512	69.0638	66.7798	41.8775	45.6336	54.8343	39.8817	57.8515	44.8644	61.4776	53.6663	53.9587	58.5464	70.1134	26.4939	40.6148	37.4283	34.7427	36.1476
P55884	65.5714	60.8966	60.8884	65.6668	72.4938	81.3921	74.2128	90.7645	79.6856	77.4926	68.7916	51.9954	60.677	59.5172	72.7403	73.3717	70.971	80.6607	81.1669	73.901
P56134	132.381	36.3057	66.0587	67.0742	119.584	114.859	46.0457	35.8412	163.938	84.0989	78.6672	48.6219	43.6165	68.3391	48.1484	75.4932	67.9578	81.8335	78.4743	86.4605
P56192	25.0254	34.5236	19.5126	22.5682	28.1345	23.5368	25.8148	33.012	27.5423	30.2183	24.4886	17.5974	30.1887	22.2677	26.6944	19.7203	27.2433	35.069	22.7869	19.9264
P56378	98.892	12.6305	24.6482	80.4629	61.6153	65.5319	28.6899	54.8029	47.5896	34.324	12.1888	40.6848	25.49	24.2921	12.2672	15.6664	28.4033	24.0605	36.2291	33.9563
P56385	133.02	79.592	43.4769	51.0891	113.733	50.5637	40.8026	77.2037	58.2562	36.3276	45.111	44.1221	33.2614	33.8617	30.9613	45.8019	47.2297	38.5175	40.657	47.1896
P56537	137.461	141.645	131.85	63.6491	102.998	106.404	135.074	78.9451	116.308	133.359	106.957	126.787	61.3415	73.3494	81.7404	87.6356	82.2508	117.741	98.1014	67.4495
P56545	35.6412	40.2041	29.9292	22.9883	27.6649	32.6265	24.4611	30.2648	13.4953	30.7615	17.38	20.539	19.3182	22.0442	19.0202	20.5876	16.3287	20.8225	19.3411	20.0119
P56945	13.7891	16.8411	10.7202	10.7933	18.2339	16.0636	7.3369	15.6002	14.4918	17.8016	13.5461	14.7646	8.99169	15.766	11.1752	14.0235	8.19124	19.7597	15.5767	9.93593
P57081	12.7467	10.173	16.4572	20.9229	13.7027	19.5248	6.85868	6.16655	14.3185	15.2705	8.26675	16.8275	10.6705	10.7762	8.57171	6.86599	5.8843	11.6544	5.86156	7.92102
P57088	32.3947	25.9151	35.5648	23.445	34.0084	50.2798	35.4032	49.706	33.4514	46.2303	40.3654	15.5223	18.2166	31.2524	23.5696	45.5216	22.2612	27.2762	35.466	42.63
P57678	16.8771	14.8921	18.6021	9.07197	6.16802	13.3742	15.464	15.0272	18.3669	11.9299	13.5397	13.3316	10.1917	15.5331	12.6291	11.769	14.9997	11.1778	12.848	15.639
P57740	25.521	22.7918	19.3554	25.7428	17.4305	26.0142	19.3481	19.6388	24.0131	20.4681	20.3198	19.3358	20.7897	22.8162	18.2095	22.3339	18.1587	18.1102	21.8975	21.4143
P58107	312.253	231.574	328.638	429.379	1085.88	295.469	235.125	792.765	244.126	189.796	467.554	195.275	160.598	234.527	220.215	248.397	306.478	220.025	178.105	167.43
P58546	25.7485	38.2806	68.6229	52.6279	35.3051	20.9564	52.2404	24.1399	21.6776	17.0308	19.2489	31.2265	26.1011	26.9095	27.8818	28.6615	42.7338	24.7106	24.8507	29.0488
P59998	153.679	140.241	210.16	116.686	185.322	43.3008	33.9627	83.6361	59.8218	70.231	58.4941	48.2415	59.2955	50.7686	66.8964	61.126	53.1773	52.5776	59.306	58.576
P60174	820.069	981.097	1025.04	1035.75	771.472	464.456	515.928	425.27	526.62	615.77	721.689	914.624	669.5	660.171	666.444	975.316	1274.99	794.339	632.755	712.205
P60228	49.9885	60.9786	58.0042	51.9358	76.1687	76.0043	71.644	74.6731	63.548	62.1157	59.6832	43.9754	70.016	81.8359	71.6116	77.3867	64.1879	90.5805	78.3795	78.8841
P60468	51.17	35.7003	25.3785	20.6577	67.2594	66.3388	40.2398	40.3969	38.6787	40.1711	55.6221	39.0215	45.6979	54.9371	34.7026	42.9193	21.2435	53.9307	41.5859	44.7287
P60510	17.5233	27.2803	16.5277	13.611	18.1399	16.8511	21.9044	16.8553	12.9497	16.6858	17.8298	15.4421	16.5682	13.9159	15.0446	16.5384	10.2815	13.5805	16.6494	9.87064
P60660	92.6508	112.995	207.655	147.497	147.465	214.067	171.624	259.465	165.164	81.812	133.965	135.278	129.738	149.419	132.754	140.926	108.792	172.43	164.727	129.344
P60709;P63261	4325.1	5143.33	7806.77	5556.85	9022.42	6850.96	4243.54	7750.31	5910.55	6369.77	4622.89	4531.22	3154.74	4200.98	3644.31	4052.12	4685.57	3811	4018.56	4227.53
P60842	516.779	409.386	509.837	539.548	610.325	585.467	626.694	692.822	709.204	778.582	593.752	575.995	512.879	628.361	646.45	582.603	605.867	678.326	733.45	689.03
P60866	49.0317	68.0699	65.6612	55.7468	65.3062	67.6957	74.4135	62.977	68.8445	62.565	60.3497	38.3032	66.6003	59.3872	67.134	68.3728	63.9801	52.3061	67.4469	62.8332
P60891	23.9679	10.7945	22.6434	18.6113	11.9265	12.2755	13.203	22.1252	21.6391	15.1628	19.6289	22.3002	19.4548	21.7238	24.0755	19.4268	23.7984	23.1269	18.4028	22.6685
P60900	136.535	104.282	157.144	152.673	89.1676	93.5876	80.0454	98.3432	61.1987	78.2808	128.486	160.369	113.759	115.776	125.134	116.39	165.774	86.2618	111.501	109.95
P60903	72.1223	45.8238	116.689	137.944	57.5896	133.573	90.1329	127.278	111.825	95.8131	62.9079	105.993	73.1545	63.1477	68.6388	67.5025	74.8533	54.5351	50.9509	79.0238
P60953	30.3611	15.8531	22.6002	24.1582	26.4838	32.97	20.3038	25.4569	28.3605	27.0645	45.5462	37.0544	28.9595	37.0492	37.0764	44.2507	21.5122	24.7201	26.6994	33.4112
P60981	76.3058	62.9073	217.319	111	135.904	101.385	107.488	145.227	97.1433	104.191	49.7231	48.5496	32.7347	64.0581	63.9068	77.6284	35.9161	65.3142	62.5219	47.4304
P60983	27.025	23.2313	35.6015	17.1293	23.7187	17.083	16.9196	18.7446	16.0591	18.4994	9.63776	8.16315	10.812	8.1791	10.3403	16.3268	18.2883	6.90577	8.64987	9.97644
P61006	15.0518	9.26425	6.18925	8.50567	6.80034	18.7513	9.84275	9.27284	6.05726	7.44772	11.8528	9.19777	10.2377	9.97733	7.26365	11.7676	12.5244	9.71702	8.8329	6.06198
P61009	52.3911	24.2423	36.3779	45.5202	47.8784	50.0766	34.1306	37.4726	30.1143	34.1776	45.6132	32.8184	23.5458	39.4979	36.2244	33.1914	28.6355	30.2928	30.3911	34.0535
P61011	14.0738	10.3412	16.7039	16.4749	13.7686	17.0142	21.8961	12.5867	12.2638	9.36549	14.9518	8.69606	11.5516	12.583	10.2882	13.5403	12.7874	9.49153	11.4995	10.6889
P61019	39.5941	48.9662	50.0596	22.6335	54.3023	66.9427	45.7107	70.103	57.9735	48.6345	36.7311	36.9964	26.8671	37.5797	38.2766	41.8167	48.3956	51.896	43.1956	34.4157
P61026	22.9424	11.2754	13.8948	17.6404	13.9745	20.2724	13.0567	13.4369	11.6803	10.0322	17.5703	14.6705	18.1561	16.6747	13.7286	20.2406	15.549	24.9771	14.6592	12.7454
P61077	62.4395	85.4699	62.9148	65.5849	60.4655	57.3437	76.3887	85.6499	58.0386	67.8143	56.9294	70.2218	65.9912	62.106	81.2921	37.2662	48.3779	47.0256	50.6671	49.6364
P61081	44.8909	32.3835	52.7698	42.2895	54.3938	77.2346	61.4923	54.9098	58.9994	62.9479	41.5522	33.4962	40.9552	51.0378	43.9848	56.4814	53.9236	44.3571	56.1725	53.7997
P61086	10.3947	22.0863	35.3702	18.5826	22.6239	35.2889	38.1653	41.9101	23.637	32.6058	15.474	15.2089	18.4467	10.2797	15.3785	17.9002	18.0625	8.89288	13.4477	16.4682
P61088	107.546	136.063	130.763	82.3677	93.1676	108.25	108.404	86.8844	151.567	136.165	104.267	95.5897	114.03	111.803	141.986	133.265	115.316	126.039	78.8053	153.095
P61106	47.6493	37.3552	48.1473	46.8899	52.951	39.3839	29.6556	63.6987	25.7871	43.6855	39.8932	39.5745	24.0717	36.0303	31.4677	28.1419	34.9302	30.2315	23.5491	24.3343
P61158	54.4306	58.0597	101.165	60.4087	81.211	37.7288	37.8278	69.927	50.8095	47.2027	51.7421	43.2757	52.087	43.857	54.303	46.3171	49.6239	45.5762	46.4451	43.1438
P61160	53.045	52.3536	79.4192	60.0055	74.6721	37.0576	43.6184	69.5704	51.6843	50.1318	51.6569	45.0109	54.2688	45.9848	51.9138	42.6199	41.235	48.1976	56.383	44.3255
P61163	34.3468	18.2351	33.064	50.351	45.5262	34.5832	31.1906	21.8318	38.3416	36.1973	20.1419	17.3317	22.9783	13.9029	18.9695	28.7842	20.6757	12.4628	16.3377	17.9705
P61201	17.6391	20.7667	14.6145	19.4612	15.4369	21.6533	22.0103	17.688	25.369	17.761	22.7385	17.8351	17.8209	14.8961	17.615	21.4002	21.2439	19.7109	15.0125	20.8393
P61204	207.62	157.247	198.491	177.179	198.058	183.443	132.078	247.708	195.467	169.437	161.585	172.02	173.56	195.774	206.798	247.814	217.978	199.34	225.495	164.722
P61221	51.2863	66.7837	69.8493	50.1112	51.275	44.0478	67.5097	49.3138	60.1509	70.1444	41.0413	47.7505	35.4253	42.2393	47.777	46.9823	38.5999	47.9523	44.4989	43.6536
P61224	104.06	95.0028	132.142	84.2155	102.967	83.7943	51.4711	85.5232	74.3481	94.155	60.634	112.553	61.7123	53.044	85.4749	115.088	64.372	54.3171	74.3928	60.7142
P61247	250.758	251.455	272.358	236.272	298.367	203.76	211.884	253.784	219.666	199.569	243.323	226.429	253.906	214.526	247.439	252.479	230.33	271.224	276.311	246.695
P61254	351.994	335.666	353.811	351.098	379.992	248.646	286.906	340.053	258.849	248.484	281.054	337.261	288.328	319.243	332.288	352.179	351.591	361.517	333.006	316.688
P61289	51.7271	54.1433	53.2217	41.2964	45.3593	79.2251	65.1657	68.8568	51.9368	70.718	59.7172	59.4757	41.17	51.2216	40.7849	67.397	60.2437	51.0517	57.9922	66.1179
P61313	368.647	389.876	388.702	326.924	405.134	324.82	326.332	395.812	344.469	327.582	289.996	285.139	302.623	275.45	271.598	313.887	313.205	322.864	307.952	279.548
P61326	7.99837	10.4528	13.2279	22.0183	16.5337	4.92127	7.52464	3.47236	3.03586	5.82083	7.50663	6.82906	12.8902	15.9867	6.92502	8.82672	8.11887	12.6751	10.9594	12.7883
P61353	282.016	320.031	343.889	295.758	307.984	314.497	329.376	372.943	290.756	317.106	332.806	302.631	298.658	264.252	309.218	341.253	297.608	326.945	323.928	287.372
P61421	39.4334	18.6167	15.523	12.363	20.433	18.5369	16.0417	30.1857	18.6778	12.491	37.6495	23.5513	19.6828	26.196	45.1394	21.3363	6.25493	19.1295	18.0541	18.3507
P61513	49.6511	56.2276	65.423	38.1862	44.1579	32.4389	14.9469	33.3186	16.2763	23.0838	66.7904	42.6323	34.1169	39.2717	32.6137	37.043	39.1643	57.699	51.0553	47.3865
P61586	41.1798	33.3218	37.0249	37.6824	34.5648	24.264	29.9957	19.9665	23.2344	41.8952	22.2293	15.1871	21.4491	21.8722	21.5063	22.6335	17.3828	20.8838	22.4916	19.8714
P61604	189.115	172.013	386.643	226.425	270.449	375.776	144.565	233.615	232.891	331.539	312.372	301.621	493.064	228.211	381.331	174.733	563.859	477.114	216.1	592.723
P61619	71.5356	30.3411	32.7791	40.4412	52.9466	76.5541	53.1828	65.3116	54.9767	59.99	68.2727	29.931	52.0749	68.0014	54.3672	64.7353	73.0272	68.1824	67.7559	56.0929
P61626	1231.61	589.564	649.26	250.301	187.411	135.859	75.434	45.4807	70.792	67.4708	511.058	761.984	87.5834	932.793	157.68	205.619	310.991	95.3491	192.734	156.288
P61758	34.9493	31.4963	43.9474	24.0261	33.9622	18.9632	22.8608	20.7678	20.139	21.7122	24.6007	24.6492	14.1191	18.8186	21.8429	30.5477	18.6836	19.5627	22.5577	22.2977
P61764	21.8831	26.094	18.0015	31.5299	19.2912	12.6025	22.7725	28.9563	21.0735	17.6698	12.5152	11.9515	11.7474	17.9242	14.1499	10.8742	8.93056	13.5066	11.9186	9.19246
P61769	50.8049	82.3431	39.3727	51.1916	55.735	11.5998	28.2337	18.8422	49.4494	48.0279	24.8624	57.334	53.0092	62.2536	19.0308	39.5861	75.9921	34.0019	38.4321	27.929
P61803	114.235	51.3409	40.1977	57.5594	104.596	123.49	77.4476	101.531	101.464	70.2416	103.527	64.6838	56.0848	76.8237	69.0758	88.528	75.7834	68.7967	74.8405	85.5216
P61923	13.7021	16.4263	23.24	20.7048	25.2723	21.7783	15.919	19.2686	13.14	18.4494	21.041	18.1587	18.0018	24.613	27.7907	19.7793	14.3394	16.2353	18.5416	18.7491
P61956	20.8054	20.7792	22.3575	9.66025	13.3943	24.471	16.0748	11.7772	11.9907	8.67368	14.9822	16.503	17.1496	23.3986	16.0532	21.1031	23.0311	27.5815	23.8567	25.2733
P61964	16.4298	15.4209	22.1813	30.6783	8.88872	27.6238	12.8513	23.6839	28.5436	27.3105	19.0157	20.1397	13.2107	15.7895	16.601	12.7694	18.8372	15.5801	17.8924	18.8855
P61970	138.231	86.3463	126.468	80.3985	74.2101	79.4676	95.1616	59.3781	79.0015	121.114	110.072	154.571	104.6	111.511	116.034	100.273	191.964	155.872	87.132	94.8813
P61978	304.816	248.986	303.962	274.747	201.507	327.384	286.86	251.697	301.341	241.182	222.775	268.431	274.152	207.176	196.984	209.771	284.61	249.412	213.296	286.519
P61981	111.121	170.708	193.03	183.792	176.016	153.739	206.253	196.071	213.792	213.995	86.445	147.752	135.851	111.251	101.045	164.782	166.175	136.533	141.434	127.06
P62081	154.996	197.881	157.666	121.303	105.699	139.424	123.237	125.165	130.695	158.789	150.113	111.69	141.286	158.6	183.434	135.941	145.66	169.467	144.737	116.873
P62136	25.448	29.1058	18.1977	21.0545	27.5341	52.477	31.9258	51.7419	40.8899	35.4859	36.3976	30.0358	37.5615	35.677	38.1635	37.0834	32.1309	33.0095	37.0384	33.4033
P62140	45.9885	39.49	33.1815	36.5728	53.9507	50.5276	54.0436	45.8814	46.9357	41.1715	32.9177	34.4381	51.0949	42.349	34.1351	41.0707	40.8168	43.847	26.558	34.3945
P62191	46.8069	53.1524	65.9929	60.8806	51.2597	62.5613	77.1863	70.7583	55.7801	65.2529	71.565	67.6969	60.7715	62.4277	64.4244	79.1386	50.3082	56.7856	71.0463	70.9119
P62195	29.397	41.7462	49.3845	33.2818	37.672	33.3126	36.8768	39.5064	29.4529	38.6772	32.9999	37.067	33.8182	31.8776	32.4053	37.7612	35.3124	32.6825	34.324	35.8226
P62241	357.326	332.55	417.67	403.028	411.953	298.127	334.346	334.191	326	356.563	303.856	325.756	340.758	383.404	354.622	322.252	335.217	365.044	358.6	331.685
P62244	267.254	339.097	301.13	247.732	330.167	330.684	307.859	436.327	309.258	299.105	284.997	296.729	299.843	292.523	317.298	318.029	330.647	401.567	380.991	334.036
P62249	388.515	311.101	307.174	303.711	446.637	331.195	362.188	424.976	361.897	341.205	409.587	404.486	451.958	464.906	449.843	432.712	429.032	477.43	462.398	421.494
P62256	10.5572	14.2749	67.1431	23.1194	47.8847	11.559	7.39332	14.1079	5.70715	13.9463	8.72671	7.10339	10.2657	11.6284	3.37841	11.518	7.55622	4.33097	6.52566	3.46501
P62258	224.671	313.314	340	288.938	218.093	192.825	312.278	287.072	309.746	300.355	290.688	326.489	282.974	286.327	291.075	334.686	414.799	247.344	306.029	292.417
P62263	266.924	387.27	276.282	282.961	319.278	209.235	318.857	340.136	259.779	312.944	284.301	250.287	356.837	347.654	321.684	330.528	280.446	361.603	359.49	288.749
P62266	66.6489	57.0728	56.3508	40.7743	43.9617	49.032	54.9253	40.1366	55.4483	29.0296	75.5063	63.9259	60.8449	65.5672	73.9789	73.6014	69.3453	62.839	72.3984	50.8277
P62269	559.527	551.878	529.906	531.848	675.329	540.579	603.483	621.401	567.209	564.997	478.996	477.992	567.948	500.902	513.654	525.154	577.955	625.425	581.715	534.617
P62273	158.171	142.17	217.82	162.341	208.742	109.53	108.419	189.237	164.875	141.285	41.9961	42.7843	34.8875	26.6126	46.4937	35.5795	57.9867	66.0765	33.0833	55.1779
P62277	618.945	526.902	801.051	533.338	530.154	391.592	362.408	543.984	459.11	352.973	201.829	312.652	191.638	261.865	281.466	452.938	458.775	398.122	326.994	261.377
P62280	305.188	281.72	349.552	297.287	351.218	271.421	271.498	268.138	251.865	275.759	200.362	277.267	282.52	246.656	278.531	278.213	331.505	339.126	278.811	245.805
P62304	64.8652	65.6022	31.8257	43.3536	36.9052	102.801	44.3384	24.867	44.279	73.4358	31.6158	33.367	41.4145	37.3225	22.2258	31.3562	39.3884	34.6596	34.5478	57.1924
P62306	12.4504	22.0565	17.3735	9.61033	12.3227	38.3484	24.8803	14.1229	16.5344	21.5707	9.01474	14.2587	15.3675	17.9694	9.29938	10.1739	14.6208	10.4231	8.49012	12.7359
P62310	24.4087	31.6151	39.0755	43.7677	37.3728	36.4542	24.3499	44.1209	40.6432	50.1739	24.9494	40.0315	39.8183	28.4593	34.161	30.4919	52.4547	35.7664	35.42	38.5579
P62312	23.8501	13.0401	11.4471	16.6601	17.6502	22.5601	7.84425	7.09089	8.19936	14.488	7.54141	22.3955	16.0447	17.169	14.0385	14.3417	23.4372	15.6365	12.3464	16.6226
P62314	31.1042	21.755	22.6604	26.0583	9.65772	43.685	37.0566	28.6689	25.4573	17.5613	50.1685	40.9761	50.8627	38.1499	32.7879	39.0712	65.4747	44.2651	49.4449	52.8557
P62316	124.921	91.9146	91.65	97.5005	92.1848	136.853	95.105	98.4379	77.1861	108.172	89.1389	99.6088	119.074	92.9738	72.0835	89.1365	93.2569	94.6903	91.716	99.3788
P62318	110.054	57.9323	86.653	71.5705	64.4268	168.376	86.6161	97.3588	76.7834	97.006	82.3569	106.027	92.2073	65.1858	52.7036	74.5334	98.7846	114.415	80.4689	102.381
P62328	83.7274	107.844	159.392	88.1452	138.567	85.046	142.623	149.356	101.619	209.193	153.396	249.978	132.836	135.455	188.227	188.827	330.57	175.347	79.9904	138.68
P62330	28.4086	23.6796	12.84	25.5274	26.8194	33.316	22.4438	27.9519	18.869	21.3183	29.2465	20.5083	28.2906	22.6865	22.9434	27.664	22.858	15.8001	33.1718	26.5177
P62333	25.5878	37.4448	39.0241	34.1887	38.3408	35.4187	40.9668	34.773	32.599	32.9051	35.4615	32.3901	26.0488	30.2994	32.5475	35.6204	26.7229	23.3374	28.3699	33.9709
P62424	262.318	260.183	295.221	219.137	274.566	177.412	202.316	208.44	169.167	176.177	172.533	212.429	193.706	185.27	168.687	207.978	218.827	234.159	224.538	224.344
P62495	29.5207	41.869	34.0821	48.9438	38.8062	59.3253	59.444	59.7909	52.7447	52.1517	56.8688	39.0038	50.6971	43.4076	54.193	59.9889	50.8493	52.2773	51.47	53.356
P62701	258.418	261.091	292.741	234.088	293.965	212.865	195.118	245.449	214.292	192.954	215.825	220.392	218.822	208.64	213.278	276.794	203.632	263.768	250.325	234.997
P62714;P67775	34.22	42.9854	60.1372	47.3876	46.7947	67.2653	78.4587	79.4243	56.7007	61.7036	41.6287	56.3401	45.714	51.9111	53.3679	48.7512	49.5695	36.8171	52.289	41.3739
P62750	346.989	277.167	277.306	326.617	379.94	244.802	270.52	291.372	231.371	235.304	288.391	278.463	294.891	270.146	292.207	341.765	310.739	292.586	321.383	311.578
P62753	326.322	273.714	362.087	284.175	272.109	326.954	299.079	336.401	295.136	293.896	283.961	318.824	320.849	332.264	326.914	331.875	310.128	386.629	335.658	339.434
P62805	24465.9	290.532	743.557	1732.93	8369.98	8754.8	4072.39	9149.09	10067.1	12466.1	3696.64	2317.14	3282.23	5269.9	1926.37	417.394	28450.7	3348.39	2854.75	3460.69
P62820	18.2964	18.1708	27.5812	14.3074	24.1151	20.3937	14.5667	8.86955	20.2598	13.17	21.8744	19.1331	23.6253	20.9198	14.1009	28.1344	12.258	24.1825	18.2243	18.2022
P62826	749.922	958.308	915.539	674.63	769.037	1041.83	1073.64	873.512	818.163	910.621	774.707	791.278	951.182	1097.28	1066.67	1006.53	874.919	910.651	847.302	1091.51
P62829	198.117	188.547	227.073	177.193	205.802	130.82	97.9922	99.5567	113.643	106.953	131.438	158.923	119.157	117.933	131.005	194.91	149.799	141.021	133.027	127.039
P62841	27.1636	40.389	53.9448	43.7823	49.7031	53.709	53.6402	77.1322	63.3162	57.7883	41.5503	49.7014	34.1903	42.9705	44.4579	67.6656	62.2785	61.8158	55.0423	40.1122
P62847	78.1013	105.535	124.485	81.4575	88.3315	69.2053	80.7799	84.0508	99.3582	97.4519	63.0315	97.9219	97.5719	67.4484	73.964	155.131	126.753	115.095	118.574	90.5336
P62851	418.487	445.489	501.998	486.152	595.068	437.157	470.202	539.779	497.006	493.66	373.707	400.429	481.379	483.259	497.847	505.02	484.142	492.765	512.163	469.364
P62854	246.822	314.708	184.295	205.645	260.848	177.688	195.062	173.355	174.375	165.489	150.798	158.614	112.758	111.96	141.754	144.112	116.487	152.497	137.025	130.938
P62857	244.31	287.275	323.676	304.245	371.839	332.423	283.225	359.969	292.013	347.073	260.707	312.889	294.538	242.384	296.443	297.335	286.418	290.328	281.991	249.181
P62861	197.827	212.656	236.549	184.935	194.543	118.178	132.843	242.269	136.491	149.165	120.91	174.702	119.514	126.525	136.626	142.575	166.812	127.011	119.415	134.824
P62873;P62879	240.249	132.523	84.5299	124.455	188.583	150.732	60.549	141.539	88.1739	78.5274	107.732	149.09	115.7	99.2172	91.8372	109.336	119.937	114.38	120.79	86.0699
P62888	174.825	143.113	169.506	142.499	151.907	53.9557	54.8316	57.0942	43.1718	63.907	74.7648	91.4285	75.0434	68.7281	84.1226	91.1544	102.298	103.328	96.4085	86.3284
P62891;Q59GN2	75.4271	81.6836	79.4503	56.5426	74.6329	41.6307	29.1341	59.4956	53.4886	42.827	43.4593	44.3022	23.2582	29.7506	33.7074	43.9717	51.3894	44.043	36.0993	37.1023
P62899	152.353	252.921	373.488	270.444	336.859	204.869	281.689	282.085	251.204	273.225	162.247	276.449	270.982	222.222	262.936	294.839	257.137	300.456	233.065	262.937
P62906	144.086	154.654	139.775	166.417	157.886	116.252	124.448	145.101	120.049	117.611	128.976	136.561	119.76	113.113	105.732	185.609	164.527	143.154	147.699	118.852
P62910	24.944	43.8335	23.0785	25.563	28.0163	40.5561	29.7229	58.5777	34.0516	34.4615	48.9794	37.1718	41.4998	41.0616	39.0226	47.1088	33.3735	42.7909	52.133	45.8944
P62913	217.085	176.702	233.146	211.781	234.715	108.68	107.784	108.313	103.386	101.612	105.655	122.988	98.0233	100.199	111.089	130.362	133.278	135.974	129.791	130.123
P62917	458.744	556.375	516.9	536.181	507.941	350.807	376.132	439.71	382.882	420.91	348.28	370.256	373.329	383.382	405.044	396.172	408.039	413.698	416.462	424.904
P62937	956.071	1309.97	1980.11	1420.82	1470.36	1130.12	1347.76	1766.85	893.426	1055.16	1002.25	1519.6	1266.17	1106.03	1041.08	1404.83	1722.8	1296.84	1351.22	1162.8
P62942	138.634	143.55	155.691	93.2777	144.891	92.6275	112.198	109.105	114.681	135.625	63.4384	77.5806	77.4656	62.0593	73.4536	55.4455	64.5107	64.8234	57.4589	61.476
P62979	3342	1769.36	3142.33	2775.34	1790.42	1548.45	1871.05	1439.22	1537.48	1257.46	2652.08	5099.21	2447.07	1985.29	2232.85	2086.24	5297.42	3979.84	2176.88	1869.37
P62993	48.373	50.0225	54.9282	36.2832	36.2179	20.7326	36.2042	35.3796	38.7725	34.278	28.5584	42.1271	20.9929	27.1486	30.4745	25.5723	28.9137	37.5478	28.8942	30.5697
P62995	38.8018	25.7078	25.5486	29.5692	29.9514	26.0887	20.6512	21.9757	20.6548	28.3408	38.6223	23.5528	37.9671	40.2725	36.4774	38.9619	29.3544	29.018	32.8846	31.4745
P63000	107.022	81.2876	106.931	67.443	94.6936	63.3909	46.6799	44.19	47.2214	57.1466	67.8534	34.8731	31.7075	34.2933	40.2778	51.1138	39.5358	44.8094	48.1537	45.7287
P63010	42.219	34.354	37.6522	59.651	39.1055	38.1672	48.3058	41.4816	44.9528	28.171	46.0646	43.3795	39.0926	38.4722	38.5589	50.6115	42.0776	40.9863	44.6008	42.8782
P63096	12.9212	8.33415	9.66291	12.8857	16.7221	20.0585	11.4543	7.22292	15.7961	13.2808	8.47201	17.5731	8.33958	9.20881	5.35647	12.8569	5.67889	8.52762	9.75537	6.94974
P63104	339.091	504.181	472.53	285.017	315.815	294.767	269.85	323.217	251.078	299.913	181.422	225.555	200.606	235.465	187.944	228.189	280.823	193.183	214.016	229.362
P63151	32.7587	37.7479	53.752	36.1123	35.282	37.2941	57.7155	39.9741	38.3926	46.5925	32.6261	29.8852	24.1514	37.1329	32.3849	28.5185	36.4471	32.7065	25.0416	32.9163
P63165	39.7918	40.8858	51.0899	46.9596	43.3879	37.211	33.9731	44.9887	31.2126	33.8985	16.6343	22.7721	26.0348	16.8187	16.9498	35.2021	28.2468	18.8592	20.9011	22.6951
P63167	13.9764	2.11843	5.22076	3.75589	7.56688	18.0056	18.1126	15.0937	10.079	14.9434	15.6722	10.7088	4.33604	5.50083	5.85891	8.07325	7.70623	9.27581	8.05204	5.02873
P63173	65.5129	53.2037	36.7158	60.1731	60.6791	118.54	117.768	56.5478	45.1536	140.781	116.219	90.3142	87.4686	109.598	111.843	145.097	92.7292	164.238	153.475	137.345
P63208	31.2545	64.1624	54.8419	62.4682	50.0414	28.0561	58.3449	55.0533	40.9297	48.4116	46.0938	37.7602	54.1331	34.1473	39.9649	49.267	65.3419	40.4161	47.7385	43.5189
P63220	55.5204	54.5549	68.1682	59.1282	70.5701	51.2481	55.4886	64.4244	51.066	46.7679	64.2499	36.6054	50.0773	40.3614	48.3007	48.3717	53.555	51.7944	47.5039	44.1454
P63241	121.081	183.149	189.771	152.162	124.612	183.625	323.851	176.504	281.558	248.096	135.19	121.672	140.18	163.65	188.861	173.394	203.935	196.667	126.66	194.963
P63244	562.574	570.697	707.67	602.633	614.057	503.178	536.593	574.49	545.948	499.993	534.611	540.433	525.276	545.196	573.295	584.846	607.803	645.882	538.967	542.43
P63279	71.1588	71.98	66.6738	82.0124	75.988	47.0997	67.8246	53.0955	77.3241	61.1408	64.2319	56.9496	82.7317	63.0651	79.4633	50.2435	77.5565	92.9017	76.0534	70.9851
P63313	140.358	162.719	268.651	130.18	209.255	130.984	191.323	140.818	144.409	106.681	81.6535	90.527	97.4624	58.8742	60.5889	65.1035	121.56	81.91	75.0519	72.1631
P67809	52.9692	79.3373	85.6859	82.462	63.7098	168.837	138.06	139.418	111.475	56.4885	148.504	164.152	196.295	163.238	134.627	213.072	223.561	213.553	193.975	158.28
P67812	58.5733	27.9309	29.9689	57.4578	68.8091	67.6315	45.5481	55.9983	55.2862	56.5912	67.4462	31.7557	32.9707	55.0715	50.1449	63.0012	30.243	45.8549	51.4729	55.568
P67870	9.13494	35.3145	13.3355	24.8562	19.2361	14.9331	15.3857	10.9132	22.7451	17.4057	17.9994	13.4842	19.7954	25.9729	15.0032	13.65	10.5753	14.745	11.7275	18.3777
P67936	85.6662	58.6938	161.526	132.53	108.586	175.196	122.277	122.298	133.951	133.982	77.4668	74.2175	68.4849	98.8935	67.7519	67.9159	66.1013	70.466	67.8092	80.0398
P68032	9690.27	9213.16	17465.6	9229.9	14946	8967.59	6579.62	8161	7456.81	9264.34	4963.57	6027.83	4029.54	5126.47	4957.97	5385.28	6377.02	5062.34	5580.94	5544.39
P68036	46.7454	46.889	59.2011	50.0748	52.8278	42.4432	56.2178	49.8212	47.7628	34.5353	34.2178	31.0903	27.3209	31.4694	37.4749	38.939	33.4201	48.683	32.1273	32.1514
P68104	3563.58	3170.43	5591.84	4400.9	6855.36	3392.99	3513.52	3990.19	3653.92	4440.42	2288.09	2629.48	2953.79	4066.85	2994.99	3464.06	3736.27	4579.39	3568.49	4564.37
P68363	849.863	1213.86	1364.84	1053.48	1200.92	873.853	1220.49	868.085	790.201	890.306	837.927	1079.05	1073.44	1170.3	977.824	1189.54	998.08	881.487	963.445	1032.02
P68366	167.081	252.576	251.589	217.327	281.1	255.988	299.869	511.652	177.193	355.486	77.8271	98.8123	120.546	103.367	87.7149	154.133	138.841	86.0595	100.005	118.367
P68371	2097.13	2666.61	2683.71	2132.02	2250.94	1855.64	2235.05	1742.71	1530.8	1828.56	1352.22	1597.46	1330.43	1567.67	1613.26	2208.71	1447.96	1387.25	1391.58	1721.92
P68400;Q8NEV1	18.9576	38.5438	22.9069	22.1385	15.2994	26.5693	16.7378	16.7658	16.5369	14.0443	11.9117	16.5322	17.1321	15.1674	11.9966	16.4298	9.75255	12.2707	13.3407	11.2686
P68402	17.0547	48.4892	39.4768	32.2505	25.057	14.2795	9.29704	33.5495	10.8058	9.75006	8.693	5.10355	5.79201	20.4773	17.8033	13.063	6.91686	15.0613	13.3086	5.06357
P68431;P84243;Q16695;Q71DI3	2636.24	37.0384	124.077	209.289	1057.67	1312.06	454.537	968.258	830.736	854.316	874.842	195.95	815.945	1076.72	798.518	38.9681	1833.28	1059.17	840.168	903.6
P68871	3532.54	1628.25	1303.27	1342.47	447.175	1325.61	2469.11	313.795	883.106	1005.24	2686.68	4395.02	1180.37	1612.55	1742.64	25441	3978.64	1257.58	5119.04	1148.49
P69849;Q5JPE7	25.3109	16.9502	23.508	23.999	17.795	27.3651	16.9593	16.2234	13.7545	19.4969	24.4627	20.9638	14.3693	18.5546	21.1998	25.7472	19.1819	23.0317	19.8335	17.612
P69905	1248.6	1633.65	973.432	684.058	93.5983	1867.73	954.781	100.121	842.243	1259.93	539.619	1107.25	765.934	1355.88	889.491	2526.37	265.787	96.0398	1340.64	152.96
P78318	27.3948	19.0823	24.5136	20.356	12.463	15.3086	17.7847	19.5221	14.7683	18.6266	13.5174	10.9597	7.62355	8.86249	7.65314	9.25645	7.54968	8.43397	7.0231	12.4349
P78330	20.1987	32.4332	14.7881	25.5067	11.3431	15.1935	23.2094	39.6666	11.4207	19.2475	28.8195	39.6941	45.1114	19.0633	39.9027	26.6714	46.1143	44.1539	27.516	16.0108
P78344	29.3712	35.7184	40.3733	32.1542	53.0355	32.6139	21.6303	31.9902	37.3336	42.7851	23.3707	22.4906	26.6282	35.0577	27.1305	34.2962	23.143	23.5683	31.7891	31.9278
P78347	69.9334	67.4558	45.3997	55.4129	32.9363	56.6918	38.3652	41.656	33.0602	22.0858	36.784	50.2468	39.305	33.8727	31.6185	32.8049	41.8085	49.6499	44.5859	34.9095
P78371	76.8763	110.164	136.453	126.539	142.319	97.5041	128.906	93.3516	115.366	129.532	127.849	143.424	139.75	146.143	152.097	144.734	119.28	152.562	119.232	165.04
P78406	15.3557	6.95149	8.83893	9.22167	7.14582	9.7131	16.3137	10.4458	10.6129	6.77929	9.79418	7.01718	6.55393	8.66319	8.22589	9.21828	12.6685	8.2024	9.01835	7.40522
P78417	50.365	55.5378	76.5374	53.7018	45.1277	40.6735	74.0468	46.4239	66.6736	68.3634	61.9454	84.7056	52.1098	62.8253	66.291	75.7377	90.7979	58.3058	43.0931	60.7792
P78527	157.14	163.493	82.1625	103.983	96.6866	132.381	154.774	134.276	115.857	77.721	74.7241	70.865	80.1433	63.0328	69.0169	89.2662	84.7891	72.949	80.2422	74.5037
P80723	215.877	171.091	326.46	278.744	195.411	500.15	588.169	416.246	420.962	395.721	308.041	294.322	293.98	233.795	280.306	294.979	310.733	273.476	233.241	278.063
P81605	37598.9	20580.8	13478.6	11491.5	5762.5	1463.27	1318.48	1307.94	1021.7	958.931	4618.29	977.657	2049.46	521.425	977.649	1653.67	3509.1	892.012	1474.21	1146.76
P82650	19.4865	14.6313	12.086	23.9334	15.9972	25.116	23.9469	10.6228	17.5395	15.4253	20.6387	20.5761	18.5514	18.5469	18.1264	20.3215	16.1307	16.836	17.4475	19.7036
P82675	31.6021	16.9324	16.0835	24.5143	17.5005	17.7291	27.1308	8.55668	11.8627	11.8905	23.9285	26.5656	13.1377	16.1161	16.5683	15.0309	14.4602	12.1492	10.4702	12.4409
P82909	13.7097	18.6495	14.5754	17.2656	10.1359	25.9638	20.6505	13.7497	12.5063	23.1825	22.421	11.7976	9.87231	9.05527	10.2546	12.7699	7.40196	11.6642	9.91839	9.16704
P82933	6.3792	10.3243	3.63932	2.13204	5.75999	11.861	6.07339	5.66137	5.56448	7.05965	4.55468	5.9033	5.2318	3.34926	3.34501	4.23095	3.41735	4.17166	3.4351	4.48236
P82979	130.915	108.588	80.8486	94.0012	83.8696	78.9353	65.3109	91.9355	69.1474	68.8859	87.7392	85.8577	96.439	64.2374	75.5628	91.5629	68.95	96.4509	85.7652	86.3532
P83731	316.654	243.895	254.371	213.233	222.616	146.497	154.961	248.449	137.955	154.291	163.726	155.24	159.271	134.72	133.769	182.903	172.172	193.915	178.817	175.377
P83916	23.2902	14.3297	28.1006	12.7134	7.70077	16.2674	31.1842	22.1205	13.3758	17.2915	15.4476	5.98782	12.8842	17.7736	15.6343	9.31044	9.44897	7.74882	8.21835	10.5452
P84085	12.9211	19.73	30.0303	18.8523	12.8786	29.2769	8.8061	18.2486	18.2643	16.7491	19.1093	10.225	11.4726	15.2207	11.3799	18.9128	17.7971	21.0668	18.2574	13.3742
P84090	150.15	179.805	103.85	129.97	125.334	88.4107	68.4392	52.6319	59.8733	51.8815	30.1988	75.7215	78.4301	65.2388	52.6174	100.831	80.7923	57.2039	65.9565	73.0505
P84095	9.99695	5.94319	7.14416	12.7414	11.3236	9.18768	6.0263	5.53217	9.01371	7.90163	5.68045	5.88253	2.98911	7.06596	4.13229	5.7956	2.81241	4.65257	5.33684	4.48228
P84098	344.121	274.94	297.993	255.28	325.575	239.675	296.428	310.241	259.451	229.468	268.51	239.44	240.97	244.091	252.995	243.493	259.065	291.665	274.569	281.395
P84103	213.583	253.017	172.477	193.64	191.135	210.696	214.089	239.296	244.268	242.642	246.481	173.731	211.009	237.061	201.236	180.617	210.933	230.802	211.854	253.652
P98082	26.6574	11.1059	8.9261	25.8583	8.31162	25.4005	24.3453	8.63659	18.1387	6.38017	18.1599	16.839	18.4099	13.6514	18.862	20.9983	12.8003	17.273	22.8804	13.8148
P98175	17.1088	18.0187	13.8612	11.8373	9.51933	19.7371	15.1858	8.50683	14.3143	15.0835	20.2367	18.5165	14.2893	14.3176	12.1841	17.9427	14.9924	14.9376	17.0435	14.2808
P98179	20.8844	10.1998	19.0318	27.1237	27.1032	30.7575	16.0418	36.7517	12.9527	11.1665	19.8577	12.3116	31.6554	11.0122	23.6143	10.3753	7.01097	20.9386	16.0951	8.94994
P99999	44.644	80.9132	52.6213	43.443	59.8618	113.404	56.3596	72.5109	55.385	84.5418	113.007	98.8396	125.615	97.8261	116.888	117.382	221.649	138.609	140.661	128.055
Q00059	17.5463	25.8602	14.354	14.4976	22.0057	16.4842	7.29684	8.24693	12.3017	16.3661	23.8	16.962	18.8522	20.5689	18.9957	8.75003	20.8241	27.2887	18.5513	25.1417
Q00169	5.86064	9.05444	5.18238	5.31475	7.73314	12.3112	9.12294	6.91927	12.0517	11.3677	5.93899	11.0336	5.32188	8.60904	11.6573	12.5487	10.9147	8.62623	7.25371	6.21321
Q00325	190.995	59.5552	52.1	91.2739	148.064	134.193	73.9337	158.014	102.378	83.6097	192.252	90.0423	131.394	204.847	125.124	202.471	122.981	204.65	187.563	245.546
Q00341	35.8298	29.137	35.6799	36.6368	35.3759	38.6179	34.5245	36.3062	39.0766	21.2637	41.2176	39.2157	44.5269	27.691	44.2129	48.149	34.0815	38.8044	45.714	25.8639
Q00535	11.7653	5.90332	12.9148	7.66343	7.80573	10.6867	12.543	5.57027	13.6611	8.44066	11.0214	11.3031	7.8975	10.9926	9.87941	5.2504	10.2362	8.32593	7.78394	4.83511
Q00577	16.4572	12.4742	19.3767	15.3042	6.575	8.28215	10.8263	24.4383	14.5703	13.0769	20.2535	18.5228	5.56466	9.10365	16.2373	9.00656	10.0482	5.69562	7.84884	8.52749
Q00610	203.73	250.698	252.689	225.779	225.49	166.402	243.558	244.287	250.051	217.713	202.416	214.647	175.951	208.035	203.138	207.217	188.164	215.604	194.429	203.556
Q00688	44.2212	58.9757	40.5591	49.5491	44.7149	45.5192	79.8901	47.7245	59.9842	54.0974	35.9552	24.0973	59.5109	33.8558	44.7649	53.3772	40.7322	28.4126	41.8822	38.3304
Q00796	30.4628	30.0393	39.2406	28.9237	26.2309	16.8049	30.7446	20.039	19.1749	28.9757	49.2386	61.7964	42.455	30.0106	47.6508	48.3015	35.3677	42.9626	48.4497	42.2855
Q00839	350.293	384.154	263	274.571	261.999	273.428	181.745	272.512	227.848	241.143	232.31	220.266	317.029	259.067	210.952	284.257	271.87	293.964	306.811	319.18
Q01081	173.531	124.906	111.073	80.1922	136.659	115.031	83.1285	173.788	120.44	124.376	68.0199	63.343	70.5811	100.338	56.667	55.0743	67.4635	106.257	93.419	130.61
Q01082	85.4838	64.4595	64.4884	77.5877	70.8172	70.7239	62.2282	90.8313	67.255	51.6652	51.5352	47.7432	71.6998	54.4856	49.8542	59.5999	44.1726	58.689	62.3407	43.0832
Q01105	447.566	483.483	471.848	397.144	325.941	581.804	468.264	399.687	414.145	531.839	151.074	335.486	285.556	331.469	224.333	297.676	315.314	231.089	230.741	302.547
Q01130	125.602	175.012	150.271	146.861	141.348	242.181	162.464	216.602	171.056	213.706	117.52	139.761	135.166	90.8665	95.6666	148.724	113.424	123.398	140.195	144.452
Q01469	987.828	522.865	586.108	656.564	322.316	298.594	322.319	346.887	263.976	394.664	1503.81	1180.44	1152.79	627.148	1897.07	398.154	6132.9	5235.13	843.609	330.87
Q01518	84.7896	53.5447	151.496	101.96	151.229	45.0956	79.5297	118.368	78.7266	96.9406	61.4504	57.2995	74.3166	69.7183	86.9799	73.8162	74.4733	55.8895	57.5786	55.2249
Q01581	12.6848	13.2977	9.68619	11.254	13.981	14.0863	11.3477	13.3393	7.6084	23.2973	21.5735	25.1635	24.5817	19.8208	28.1745	22.2861	22.9305	28.2185	16.1313	9.76721
Q01650	196.125	153.401	66.7733	77.3432	137.011	249.982	79.1621	147.816	138.442	123.186	80.4269	39.0496	56.8093	43.2601	52.6315	71.8587	35.4285	65.1418	52.3657	37.273
Q01780	17.7369	15.7691	16.1509	19.2704	13.5329	24.2675	16.6427	9.81683	14.2414	18.8221	13.1956	13.0445	15.3569	13.1343	9.06539	12.9523	8.31939	11.5118	12.8426	11.196
Q01813	50.85	43.0757	128.198	76.8383	138.278	72.417	66.8353	83.4998	77.9407	124.636	57.6205	67.5087	58.9429	58.4366	65.1753	59.0316	54.4859	38.817	55.4964	53.6719
Q01844	40.6086	62.9472	55.7756	49.3943	46.6447	90.1828	48.1321	64.6921	63.1958	61.6184	63.3642	48.8266	61.5241	47.577	54.2666	56.966	40.4639	60.2478	42.4843	53.4709
Q02218	33.1824	25.9302	22.3667	29.7944	32.4245	43.6038	26.9297	16.1193	26.6046	15.7672	37.7681	26.09	33.8098	32.0108	28.5984	27.7075	21.3729	26.2458	33.7767	37.7637
Q02241	3.90957	11.5474	12.1526	14.3345	17.2696	6.37696	17.4487	12.8196	16.7662	14.3004	39.2876	9.62535	14.0429	12.1146	9.81599	11.4029	9.69699	7.28484	9.17535	6.69381
Q02413	369.774	121.342	157.339	340.937	59.2103	119.058	92.4306	60.3571	70.5714	72.6444	665.928	690.102	44.1091	254.817	438.005	43.6193	107.22	42.7005	33.6724	26.6481
Q02543	128.042	114.412	140.696	132.507	132.297	115.213	137.512	69.7633	90.1866	97.5275	127.692	134.298	151.982	144.655	175.145	132.426	167.686	172.753	150.853	160.561
Q02750	386.654	220.495	322.835	169.921	136.055	814.674	378.399	84.0607	206.695	416.094	193.887	174.256	190.34	219.481	155.254	231.679	281.309	108.458	159.408	157.855
Q02790	77.9503	76.8323	107.982	99.3094	151.67	125.847	148.523	128.931	133.512	160.82	101.947	99.2058	130.787	113.932	131.474	140.692	120.647	113.552	119.739	123.005
Q02809	61.4672	48.148	57.4972	40.5466	83.703	61.9347	47.0962	53.0187	60.9551	47.5321	35.4982	31.7672	33.6224	33.0926	29.1135	36.3627	22.7896	29.085	29.1193	24.7536
Q02818	58.992	45.036	40.32	41.7633	28.8841	49.6	37.4308	34.4698	38.912	33.2107	32.3016	18.2986	26.3504	18.9238	18.6862	28.8778	19.3052	16.178	11.6057	13.5922
Q02878	367.559	472.829	503.934	471.358	525.187	347.794	351.479	464.523	358.05	361.913	436.205	403.254	375.006	390.752	388.692	500.545	363.011	459.285	399.979	372.212
Q02880	9.93975	7.55725	10.7979	6.29512	6.33814	8.7316	8.89957	5.35218	2.54187	7.54031	4.86302	4.81819	6.94808	6.39547	5.87515	7.67042	5.80487	4.92005	6.49468	5.89687
Q02952	3.28394	10.618	12.8109	10.2455	10.8223	18.4337	17.9615	6.54893	17.0363	19.7212	10.2831	9.4883	11.9567	3.91691	6.31847	6.82835	8.67593	4.32999	6.80205	3.39414
Q02978	29.4223	9.6043	9.90776	23.3109	22.4458	31.0983	16.17	26.6083	28.6928	19.3778	29.1098	15.6622	26.1271	40.5848	26.7631	34.2953	24.629	21.5428	31.2994	34.1601
Q03135	26.4689	14.3141	37.4912	11.9705	46.9317	15.349	10.292	21.2502	12.1932	17.3645	9.33055	12.7022	13.4391	18.2174	9.8073	26.1892	11.3978	9.64268	15.5633	10.4655
Q03252	34.3499	22.5492	27.2146	28.1811	25.0172	30.7853	22.0374	18.5457	22.6772	26.8694	37.1245	30.2269	32.2496	28.412	24.9081	35.2404	27.1373	29.2233	29.0134	30.452
Q04323	21.1478	33.7248	36.6346	48.6463	31.2057	39.2245	41.1919	21.6961	45.7182	36.7198	27.315	14.4034	24.4959	14.0443	18.5495	23.1515	15.7573	12.168	16.281	23.3384
Q04446	20.8955	21.0656	47.7446	44.6208	52.2747	11.7536	36.2618	35.1329	23.4056	26.3788	23.3172	21.3938	7.18717	14.5674	15.2774	15.7042	12.108	8.34496	9.65259	10.4302
Q04637	83.9288	74.8484	108.475	98.1294	124.541	94.3568	106.813	107.336	116.374	115.123	115.324	105.049	110.871	113.06	129.475	127.21	111.508	170.306	142.058	134.775
Q04695	156.185	73.057	50.6632	133.076	107.532	272.444	264.72	444.948	113.467	205.022	2934.15	850.329	30.28	59.9636	731.622	36.6939	62.3316	25.3565	18.6997	27.3238
Q04760	35.1419	33.7422	47.0699	30.0827	17.0744	17.0844	32.2139	37.7091	24.513	23.6038	99.1812	128.049	149.645	92.6709	100.146	143.779	225.2	121.252	99.4094	94.6897
Q04837	17.6915	7.7795	44.5795	42.2364	55.1028	107.765	77.6437	59.4306	93.4787	66.7695	82.7841	92.3696	90.5219	60.3829	91.3416	69.7383	110.122	95.8457	83.126	88.7667
Q04917	41.3909	41.7332	55.5704	37.4914	46.2182	41.3092	50.8228	47.0845	60.3907	51.0194	28.1927	34.3511	24.6004	32.7954	34.7763	37.8601	47.1102	34.6068	31.5055	33.7638
Q04941	102.85	112.835	107.277	103.339	92.8337	86.499	70.3979	196.228	90.6673	174.496	91.0914	135.929	78.8528	92.743	86.959	117.214	104.752	86.2144	84.0952	86.6686
Q05048	18.1413	27.2627	11.8484	6.28731	14.4187	33.4456	42.3385	12.8337	17.8468	18.1603	21.2798	18.1331	12.5748	17.3597	24.4776	19.8991	27.2209	10.5708	25.6087	12.8608
Q05519	48.6517	21.2801	14.8008	10.9273	25.3797	18.8329	8.91061	25.0993	26.4219	60.7108	22.8922	8.91204	16.9785	15.2308	16.624	22.263	11.5253	7.74288	10.0788	11.5311
Q05639	105.233	113.652	15.7663	42.7617	395.174	52.2752	63.5943	68.534	74.0765	77.2946	28.268	27.1532	26.9635	27.0874	20.1019	29.5487	45.3386	42.5475	37.6664	24.695
Q05682	51.8751	46.3224	136.607	46.9115	152.961	82.5467	48.4497	53.1529	60.3603	37.5089	37.4394	42.9339	35.4072	35.4264	32.4512	43.9202	29.561	38.8542	39.5157	25.4349
Q06124	33.1853	24.0338	31.8103	15.8837	19.517	28.4521	30.5235	15.0067	23.6171	26.6536	28.9841	19.5647	14.5635	16.9936	21.9178	15.0928	12.2708	14.1121	15.7952	14.6323
Q06203	29.7061	20.7385	27.726	24.4452	21.022	19.6908	37.518	12.4885	29.4706	26.3204	15.1455	12.3537	12.0133	17.5956	14.7961	14.8228	13.8586	10.0515	14.5436	13.2923
Q06210	17.8912	19.403	29.409	21.1331	17.4944	19.1252	23.1308	16.6752	29.6609	20.414	24.2134	24.9021	27.5454	28.8337	27.6701	34.8828	28.3331	36.8023	30.6787	25.1985
Q06265	18.8236	20.1913	22.186	20.4822	11.9304	24.5415	17.6165	28.9693	13.0446	23.8244	17.3732	20.3126	21.0528	16.5003	17.5691	14.9089	11.4725	16.5467	15.9877	17.5095
Q06323	35.7461	48.6738	20.0267	38.8933	29.1443	25.6464	36.4522	35.792	38.0866	25.5982	42.5654	129.032	99.2871	56.8298	71.4604	89.164	87.0981	59.3386	67.546	58.3217
Q06587	18.3653	16.8019	13.1089	7.27842	6.40225	12.8637	11.648	12.3579	7.85392	8.34394	7.96882	5.85756	8.09578	11.0995	9.99552	14.1202	9.83348	6.6416	10.0828	7.93655
Q06830	2896.3	1783.75	2154.21	2538.4	2560.81	1084.18	1614.96	2921.87	1516.35	2379.17	1339.37	1607.14	1647.54	1444.49	1697.49	1531.19	2267.55	1452.19	1382.89	1749.97
Q07020	222.998	325.081	158.434	161.081	150.794	121.367	122.725	161.649	151.51	122.021	255.844	219.518	198.401	195.121	192.629	201.296	206.47	246.009	215.45	207.327
Q07021	129.886	141.718	131.229	100.632	127.977	89.4214	62.0119	51.4596	79.171	53.662	99.9853	113.507	77.5842	82.7011	97.7016	47.0032	83.9352	78.7444	77.9083	101.555
Q07065	59.8459	44.3635	74.1664	59.5959	81.2632	74.5675	52.3087	39.6244	58.7205	31.5934	19.6549	21.7673	16.6041	22.0431	17.5278	18.0721	22.1013	22.4356	11.9422	23.9515
Q07157	15.1862	10.4497	17.2777	11.2086	15.9793	15.6478	15.6961	16.8321	13.3326	15.7006	13.579	13.9463	13.7286	10.3022	13.5003	14.495	13.4258	11.4375	14.7362	9.79209
Q07666	63.6777	57.504	55.128	71.0453	54.7821	72.2085	49.3438	68.6493	61.5562	71.1111	53.4062	60.9287	66.5608	49.3031	50.2215	54.2625	52.4926	54.9015	54.0535	65.6335
Q07812	20.9237	12.9814	36.5982	27.6677	34.0562	14.8024	13.3553	5.99892	8.596	12.3066	20.2175	20.3971	8.92225	10.6094	17.0593	12.3458	12.4034	11.5326	16.6305	8.84171
Q07866	16.9416	21.734	22.3097	17.6825	16.2111	19.45	24.8669	16.8212	23.9845	19.2549	14.8763	16.9983	13.0744	17.7768	19.4078	14.7998	18.1035	7.35447	15.1855	13.5003
Q07955	198.294	223.081	164.408	151.685	144.111	200.296	182.965	185.178	177.009	200.056	157.242	130.3	188.89	174.737	127.412	138.489	108.068	166.62	166.787	177.58
Q07960	42.2464	68.1329	85.4913	59.5869	67.8206	18.8101	48.2164	36.6484	43.6049	32.8167	35.2925	27.2974	39.4534	32.0663	33.0708	44.0937	40.218	26.6959	31.4646	29.5329
Q08170	9.13138	8.60036	14.7556	8.56166	3.60068	7.2796	9.81028	9.41557	6.57143	14.3521	10.52	11.4139	9.86321	11.0221	8.36655	12.1217	10.2444	8.39366	7.38554	8.06971
Q08188	216.274	63.4842	106.394	179.438	32.7242	70.8199	67.4163	38.7437	36.6353	50.038	359.316	421.652	41.054	214.022	332.974	35.7792	204.851	132.324	44.9859	28.3249
Q08209	33.0636	37.5261	42.0255	37.9451	29.4646	24.6777	34.3695	26.3462	25.0013	24.1259	14.0793	14.6603	18.8889	14.7453	17.0885	16.6573	13.7334	12.1895	18.721	10.8891
Q08211	214.786	234.778	167.985	166.5	176.735	156.37	150.724	197.948	164.621	183.612	176.469	151.888	219.202	172.339	148.959	201.067	164.187	198.036	192.415	224.387
Q08257	36.8582	37.4574	47.2206	29.3842	37.3141	22.0271	24.2675	20.1779	14.467	29.4139	39.6661	42.3428	41.1433	32.1293	49.0208	23.7885	45.6798	23.6029	30.7616	31.2707
Q08380	5.72936	9.06845	14.4963	9.55182	6.24882	10.4951	14.3817	7.57656	21.9033	9.15021	21.064	17.6222	14.44	16.2261	16.4295	15.8835	12.244	15.027	13.4908	10.6268
Q08554	337.087	117.984	143.41	202.446	67.0031	80.4263	84.5615	33.8214	55.508	59.9842	620.666	695.541	67.2155	233.239	356.138	74.2829	134.104	73.6509	56.6548	47.1229
Q08752	19.4197	26.5582	28.1902	19.554	28.2293	39.808	36.2191	26.555	27.1134	42.4652	44.5301	41.0686	49.8361	34.1593	42.2226	49.2627	41.512	43.8218	41.7225	47.1535
Q08945	92.9563	130.14	40.4466	66.6483	82.3413	112.233	69.1738	71.4643	83.0674	65.6054	66.5136	43.2574	91.1338	90.3253	52.5882	34.3425	75.7545	60.0368	88.9933	95.6495
Q08J23	93.8321	114.339	94.0299	83.9651	89.7473	113.926	89.4324	98.6295	102.739	110.404	69.0107	49.0111	81.9047	55.0984	58.0316	69.4542	60.2218	71.1583	66.0623	72.7834
Q09028	188.174	177.507	170.4	160.21	135.355	128.39	156.904	187.004	138.056	170.777	124.653	167.955	160.669	137.882	129.076	142.844	198.331	124.491	149.783	128.219
Q09161	19.6809	16.8739	26.0738	24.3464	27.1395	32.0465	46.128	42.1724	29.1842	19.2137	19.3877	18.1257	17.3204	23.2465	15.827	22.1049	15.2223	17.8644	13.9243	22.4982
Q09666	273.08	211.377	258.461	225.428	234.454	246.327	195.341	249.26	263.399	272.645	166.521	188.737	189.64	152.508	176.702	279.498	175.559	111.921	170.869	117.764
Q10471	61.5167	50.3465	40.3217	46.2089	53.6671	61.7235	51.3126	55.7608	47.7035	29.2395	38.9577	26.5704	22.8234	29.3815	25.5438	33.2728	11.1543	18.8086	18.5874	23.8402
Q10567	33.3276	24.9407	36.1026	35.049	24.0537	29.809	37.8947	27.785	27.5637	34.7275	27.3343	31.4868	20.6998	29.0188	33.0812	22.0265	33.2438	28.4988	22.9113	21.5064
Q10570	18.9804	10.2611	6.8002	10.1514	13.0281	17.624	9.63446	11.0886	15.1584	11.1887	13.0435	13.3297	16.6411	13.343	10.2665	13.8272	17.7399	14.9272	15.2057	14.207
Q10589	64.3859	30.763	76.27	93.5359	90.3304	132.895	38.9555	38.401	85.2283	84.3468	47.5981	47.2337	39.3166	81.0333	46.6541	71.5426	24.1758	35.3984	22.6058	41.5049
Q10713	32.9795	45.4569	35.1885	36.6505	30.5655	31.7209	25.1479	18.4221	31.7595	26.0896	32.5199	31.3605	25.432	30.3524	33.8079	18.8456	20.8431	28.803	28.7981	32.7837
Q12769	32.1003	39.2256	29.9544	20.103	21.656	30.5167	22.9356	27.5931	25.9818	25.1372	18.7747	14.1414	16.9143	21.3129	19.8759	20.8712	21.2656	16.02	20.0026	12.7887
Q12788	27.2594	19.587	25.5418	21.5361	16.2487	9.09325	10.9969	8.79773	13.2927	10.0017	15.2875	13.879	13.8103	11.2128	13.0159	11.5433	15.0371	17.7072	19.0772	16.4667
Q12792	24.732	25.0536	24.4542	27.7142	22.3382	24.7839	21.4169	19.9264	16.1775	24.4803	20.0581	27.3873	27.7668	25.5429	25.7476	22.3986	31.4256	29.0767	23.255	30.3377
Q12797	48.7436	72.7352	44.2753	38.6293	40.7928	28.0338	36.4917	39.8704	18.0654	20.5725	5.37701	9.2621	8.34125	10.5066	2.31596	10.3443	6.08124	8.76016	8.79943	5.01498
Q12849	404.357	593.003	585.386	363.796	324.181	518.176	291.014	220.816	326.367	290.8	369.008	411.08	263.896	348.093	360.833	265.241	169.278	190.993	239.35	279.001
Q12874	37.6423	49.5492	31.6721	46.8136	35.6434	31.2463	32.8246	31.4215	26.6598	31.6574	33.1663	24.5358	30.6029	28.2085	23.9176	33.1511	19.8669	32.6985	30.2888	28.249
Q12888	22.9128	19.7444	25.7619	17.4579	14.4535	21.6468	24.766	19.0161	20.5087	22.6959	27.5109	19.2758	28.5876	19.8207	20.5174	24.4466	18.2462	27.7371	25.7901	14.6405
Q12904	47.946	27.1717	36.3913	28.7154	36.9339	42.3438	37.7163	29.4136	35.0596	37.1022	24.2119	21.0707	29.4452	32.9173	37.8801	27.0658	37.538	30.1146	28.3337	34.5774
Q12905	104.98	88.8532	45.3703	63.8975	66.2722	121.301	65.6838	79.7937	97.4193	115.241	95.3869	64.96	90.5131	72.6027	67.2777	79.9121	79.2768	90.7291	91.6968	99.3777
Q12906	144.513	92.8451	89.9771	96.0817	83.9096	141.166	105.234	90.9321	93.1789	112.625	121.819	82.8342	114.881	112.691	97.0737	107.232	90.3472	130.484	125.498	127.747
Q12907	46.3974	48.1284	23.0149	32.0386	25.7588	32.3097	46.8724	40.5857	36.9831	44.0669	42.6943	29.7198	55.695	55.0952	48.7353	58.0503	56.1214	53.0712	56.5964	54.9704
Q12931	103.564	134.371	79.2889	86.9628	64.3124	128.113	74.5133	91.6424	108.409	71.84	142.592	89.7473	127.526	116.535	139.886	62.9727	83.4147	144.538	126.819	135.785
Q12965	19.4868	10.1661	15.8606	15.8074	8.63284	14.9449	9.07219	16.7181	9.01902	17.0521	24.5031	16.4744	11.4743	17.5155	13.4561	17.3424	15.2293	27.5391	19.495	12.6421
Q12972	21.1319	10.9966	3.84817	9.42278	12.2067	4.08374	7.50556	5.68074	6.41998	6.49528	10.5361	6.07212	12.672	8.56539	8.70615	7.39635	8.54224	7.78856	7.70735	11.3756
Q12996	29.1331	17.0268	23.507	15.9496	14.3038	24.0194	24.4547	14.2206	13.3208	18.3522	16.8677	18.2757	21.4022	18.8866	18.8143	15.2166	15.8898	13.1917	19.9207	18.9615
Q13011	20.2106	20.5484	15.5896	12.4571	8.86887	19.5845	15.1884	15.1965	13.9908	5.30596	23.6267	17.1248	19.0652	25.861	27.2032	15.0431	9.82353	19.4162	18.9433	19.9771
Q13045	16.2936	7.7439	17.4296	16.6938	14.1838	13.9094	9.85298	18.3298	13.2592	11.4823	8.83364	8.83994	8.07026	9.7076	8.51263	10.6006	6.72072	6.57352	7.56616	7.00654
Q13057	39.993	38.4401	28.5418	19.357	13.3982	23.0946	42.4667	17.0715	31.1545	19.4565	15.5794	14.5429	8.473	20.4725	20.35	19.6673	19.1121	18.1694	14.5037	20.1287
Q13085	21.4742	16.9027	23.0798	32.0689	14.0277	17.9798	31.9922	22.5272	30.2554	21.3916	23.1662	22.3699	19.6591	19.5353	28.2252	20.6057	24.9318	21.7588	27.4952	17.7205
Q13098	34.9354	39.5576	31.9381	29.9437	27.9909	31.5416	39.1976	26.9907	32.5731	42.5675	31.5832	29.153	28.8469	24.1076	26.5414	31.8091	24.435	24.8576	29.4007	31.5272
Q13123	34.7787	21.4667	9.49683	21.1089	16.0338	32.625	17.0036	23.0651	24.9493	23.5866	16.5426	12.7843	12.0776	17.3858	10.0791	15.1105	14.009	20.1348	12.4308	16.7566
Q13126	23.725	37.7117	32.2107	34.2221	20.3591	27.7026	60.1848	19.357	43.8441	61.5896	29.9456	32.9459	24.7871	24.4445	28.9613	24.095	29.5825	21.5181	22.3323	21.3485
Q13144	13.0759	7.46557	8.47932	11.5119	15.7091	8.88515	30.9332	4.67155	2.49654	11.0822	9.03658	9.02912	9.23344	6.35868	5.73541	10.2008	8.78396	10.715	10.6491	11.7653
Q13148	46.0791	49.1552	37.7053	34.7324	31.1455	37.737	25.6418	25.8465	25.0941	32.7044	41.1849	31.3992	38.9387	25.1112	29.522	37.9574	30.613	34.5849	33.4601	32.9868
Q13151	34.733	37.5709	32.7536	33.4389	27.6585	63.7566	38.2878	75.2459	74.8366	43.1927	33.0402	40.1061	48.9202	28.5559	30.4323	51.7987	32.2443	41.467	30.9618	47.2009
Q13155	16.7895	25.3106	11.2898	23.5516	12.747	22.6593	32.1091	51.816	44.0779	22.1859	23.117	11.2568	14.9955	20.5889	15.5345	11.5992	22.4456	27.6077	19.0138	24.8676
Q13162	19.2034	16.9364	16.3597	19.841	15.2937	17.9502	25.5452	19.8419	27.5906	19.7478	22.0469	16.8271	7.39535	8.10327	14.3182	16.2064	36.6701	10.3742	10.8993	13.2136
Q13177	32.155	29.776	55.6966	51.9058	41.4165	31.9829	37.0629	35.7347	29.3624	39.091	27.7807	23.9069	31.9914	26.6812	25.8185	32.9306	27.6107	30.2855	35.2242	31.4861
Q13185	32.849	24.6864	36.3987	21.8206	19.2501	27.6615	25.4386	17.2449	25.1155	30.7232	14.2138	15.2533	18.4311	20.0559	11.855	16.8961	24.1211	16.0199	13.4183	19.171
Q13200	37.4663	27.5785	38.8694	37.0356	36.2171	33.6157	35.5764	39.4164	38.5292	43.544	38.4629	40.6664	30.5172	38.3522	37.4014	48.0543	32.4304	46.976	43.9463	41.6355
Q13242	30.1733	31.0757	31.955	17.9379	23.9443	35.9559	34.2023	21.5328	34.1631	17.1311	41.2754	38.7277	41.8012	34.8786	31.4911	39.5091	13.9438	50.5585	34.4707	28.3676
Q13243	25.2082	15.8795	24.1527	30.3493	31.3235	10.9928	7.87927	22.4612	4.13644	12.9682	12.8464	7.09914	7.74329	10.8096	10.6201	18.8634	11.746	14.2199	16.1288	10.0986
Q13247	211.268	278.566	194.772	209.851	167.656	238.06	220.48	191.364	201.166	218.428	135.664	143.1	143.991	169.914	125.257	170.381	153.517	164.634	150.948	183.473
Q13257	10.1852	8.4903	8.11446	8.50293	12.7203	16.4158	18.5678	6.70346	9.81708	5.5841	6.86731	10.0463	7.67026	4.2282	3.14652	11.1705	7.44238	5.59988	6.63911	8.01064
Q13263	113.248	64.3664	56.3445	65.8524	63.9081	111.378	107.316	77.2659	96.1098	106.957	68.353	68.7149	96.0886	84.3836	72.0006	66.6814	70.7839	85.2395	69.9037	112.608
Q13283	88.6641	123.691	53.1301	78.8595	61.9849	90.626	73.5558	98.0778	78.6858	56.976	86.7841	72.5212	101.767	65.0229	73.7292	90.214	93.1108	71.7921	85.7688	73.3344
Q13296	145.252	74.8151	53.6912	43.3219	44.5769	19.1806	11.1023	11.8997	7.27067	9.54974	52.6086	172.822	28.2036	9.97222	17.6172	31.9884	96.119	14.1679	33.0281	13.8918
Q13309	30.0973	13.235	13.5735	19.6486	12.3616	19.7032	15.45	6.66722	16.6021	12.2162	16.9084	19.9146	20.5038	13.0748	12.3656	9.07619	15.3554	18.4482	9.45997	15.8619
Q13310	51.9059	38.4524	48.6463	40.7932	51.0157	61.8135	85.8194	66.1437	76.1343	95.6096	58.5092	45.3589	77.4276	71.0339	57.1381	60.0624	56.341	54.3438	63.0455	71.9731
Q13330	18.5685	19.7022	8.35753	10.156	11.1003	15.9671	17.5941	17.8261	14.61	10.5672	11.8744	5.91716	14.3275	9.35754	10.7329	6.72679	9.29829	8.21071	10.7243	10.9633
Q13347	42.4736	32.587	43.6066	31.2845	45.8385	43.3563	52.0747	42.9069	46.9188	49.8328	46.6893	39.8098	47.6532	48.8016	42.5949	55.1074	38.4449	52.9168	48.2231	54.346
Q13363	19.1412	21.5847	19.1588	9.06825	12.7382	16.2073	15.1806	8.3341	14.99	6.02454	12.767	7.22593	10.8577	7.01072	6.49139	4.15957	7.82787	7.54019	7.91733	7.3923
Q13404	78.5676	94.8709	112.477	70.6717	105.3	120.314	149.106	92.5607	114.444	133.345	67.1184	90.3773	60.0417	69.2187	71.3024	62.8384	76.523	62.5398	63.8858	86.9164
Q13405	10.2632	7.86703	8.47155	3.8749	6.99993	13.2584	8.71499	3.67477	7.17057	8.18849	6.25469	9.44641	8.33652	8.24949	4.0543	8.21137	6.09442	7.61956	8.38531	7.70646
Q13409	9.0481	4.89612	14.7885	13.14	14.0774	9.79054	10.0036	8.29197	5.42789	8.60167	7.50248	9.16733	10.8778	5.41681	8.7297	10.6115	10.5544	7.28611	8.71574	4.79481
Q13418	21.477	31.2891	28.4676	16.6253	43.8783	16.7781	9.63573	17.5059	17.9843	25.9066	9.91611	11.0606	11.064	15.086	15.2898	15.8566	13.677	9.36386	15.221	10.0074
Q13423	50.1936	73.7283	36.0831	45.6618	40.8761	39.112	30.8436	35.074	28.34	21.7254	40.3356	35.9171	58.0135	38.1543	38.1798	44.9405	37.7805	36.034	42.414	38.4943
Q13428	32.4082	42.4866	35.7398	34.5765	37.9249	47.9593	35.1664	44.2412	37.2096	30.6959	35.942	44.9306	47.8096	33.4642	29.1915	43.4938	53.7546	40.3302	34.6694	42.5578
Q13435	74.7119	88.0934	85.3492	71.7438	63.2719	79.2208	66.1811	68.4815	67.1558	81.8212	78.1576	77.759	65.7833	73.1252	60.0496	70.8597	53.6694	66.1808	62.8803	71.0968
Q13442	40.8279	42.246	41.5128	49.6776	47.9511	52.3055	46.3511	60.4309	62.773	56.4934	22.8576	24.5815	43.0788	32.5255	32.4551	35.3652	33.5484	41.0459	43.3206	37.5669
Q13492	12.8384	5.62978	12.4146	10.1114	12.962	7.07339	7.48699	10.3795	8.27129	7.3538	10.1326	7.46353	8.49804	5.41279	5.17503	9.29362	9.55221	5.54796	6.34558	6.35308
Q13501	33.062	17.8423	28.8229	15.7437	31.7156	24.6856	15.6713	13.454	8.77035	22.4879	19.6388	16.1022	12.5114	35.1229	14.0152	11.9811	26.4114	10.8656	18.9968	11.7033
Q13509	22.7168	15.2259	40.9744	27.9651	16.1584	20.4967	21.4035	11.6143	17.1462	8.83339	4.74133	4.71658	3.98894	7.80358	3.38137	4.58352	4.14527	8.79399	6.36716	5.25119
Q13526	16.0285	8.58201	12.8688	13.4173	7.41334	7.65342	9.41749	17.4782	7.12062	7.36538	11.5805	7.12168	4.88644	4.95133	5.59453	7.07734	10.0501	7.01161	8.30343	6.35909
Q13547	11.7333	15.9769	9.6602	16.707	14.0017	19.5442	20.3286	21.3633	15.1995	16.0854	20.8116	20.8129	27.435	13.4307	17.6701	8.15548	12.5397	15.612	9.37468	6.40457
Q13557	14.7262	16.978	12.1337	22.1307	12.0001	12.2055	10.517	7.72389	9.43493	5.53224	9.36662	12.4598	4.73417	5.26158	10.9079	4.11628	9.08626	4.57164	4.17746	2.73754
Q13561	22.1406	22.4026	16.4536	20.9951	25.2614	15.8811	23.7876	18.3488	16.4307	13.2622	13.5883	14.7305	17.2019	12.5646	14.1266	20.355	17.8838	12.0107	12.1033	11.2798
Q13564	13.5261	19.1385	23.4923	17.8412	13.1619	17.267	13.0662	13.7771	7.61706	22.0595	19.7815	19.5638	21.2049	17.9713	14.2659	23.4141	17.9244	17.5957	15.8056	16.6408
Q13573	37.828	30.3965	16.0768	30.1838	15.3373	20.4448	21.7266	13.8968	24.284	19.3696	28.3389	18.2403	23.4401	19.4056	17.2507	17.7798	14.2892	16.6284	17.8495	18.7027
Q13595	55.6783	48.589	30.7895	34.1013	21.4172	33.3959	14.6738	34.1799	20.1346	31.6597	25.4577	22.4955	37.8191	25.765	25.4681	25.7283	24.6256	26.8189	25.7182	23.5207
Q13596	13.9828	18.573	13.8802	12.9742	8.29387	9.45805	13.4492	11.7627	10.6014	14.9323	13.4221	11.0506	11.2702	10.2419	12.5855	12.1562	8.34916	10.2932	12.4676	8.8861
Q13601	13.3842	10.1062	14.6271	22.2773	15.2534	12.5522	9.04999	10.3142	11.3287	18.3103	17.2912	19.8402	13.7594	13.4891	13.0728	15.751	14.3473	25.6627	15.5267	13.59
Q13610	12.6393	14.1168	16.3671	11.0321	10.1762	20.3048	18.4972	15.5273	10.8112	14.2813	21.2835	14.9014	17.2744	14.2943	18.8582	11.6152	16.0225	21.0812	18.335	18.6807
Q13616	20.4044	17.4926	21.8056	11.9333	17.5677	19.7773	23.4578	18.2971	16.3291	20.5769	15.7988	15.7062	12.3559	12.687	10.2804	14.2885	12.2292	16.2923	20.3493	11.4955
Q13617	13.8325	10.3929	11.3244	8.86887	6.92001	9.10139	10.9596	10.2667	14.2733	19.4498	9.31188	7.78592	5.56774	6.82928	7.8462	7.12202	7.76362	6.99789	6.00598	7.6459
Q13618	17.802	12.8042	19.8228	9.98463	6.70897	14.6841	14.2461	17.1313	14.4246	13.989	10.0964	8.69814	7.77943	7.29341	7.82025	9.56262	10.3546	4.8292	8.07955	6.10356
Q13619	17.9007	22.7885	14.6582	34.9838	15.4841	20.1603	17.1004	17.7193	18.732	9.12932	15.6239	15.8929	10.6987	15.4756	18.8891	22.3199	14.2489	14.4639	12.0484	14.2138
Q13620	30.0223	38.1829	36.3753	19.7284	29.5359	29.5477	32.3789	30.8308	22.1046	22.505	27.626	24.0903	22.837	31.2788	27.8329	30.0101	21.5791	19.989	25.7215	30.3587
Q13630	22.9936	41.6606	30.1689	31.0817	27.8637	12.0884	34.0037	18.1296	25.933	18.5298	18.8893	26.2289	26.6923	22.6389	31.1567	31.0687	42.5673	26.4564	24.2043	24.7096
Q13637	27.5175	15.275	34.3373	39.9287	77.4427	40.1326	31.1658	69.7586	37.8462	55.4342	31.245	12.487	24.5765	27.9081	26.9515	31.9721	15.0787	23.5007	31.3552	23.7168
Q13643	17.2975	24.3669	38.039	21.8448	72.9713	18.9853	17.6398	25.8181	16.9934	12.0238	12.9143	11.3498	18.0202	10.6727	10.2884	15.9946	15.346	12.5369	15.7625	14.7895
Q13685	18.1992	19.0672	5.9916	8.24169	6.72172	12.5352	9.14031	10.6889	11.9951	9.78599	11.4218	13.3536	11.2558	13.8578	14.0686	10.7969	6.74283	11.208	9.60882	7.51815
Q13813	74.1076	73.2679	72.0938	81.6183	71.5641	94.7207	89.3365	111.06	88.6387	64.7048	63.8114	57.5183	79.7785	65.8925	56.3943	61.6729	59.3459	65.8876	69.3406	51.9918
Q13823	11.9203	6.28578	44.046	10.8166	5.46051	9.20435	9.32083	10.7686	9.92287	6.19985	11.6813	8.79047	10.8354	7.4603	7.65168	12.3664	8.86531	7.02344	6.55218	9.06544
Q13838	58.023	93.0167	42.172	41.4018	47.2857	33.4393	27.3295	35.9473	27.9005	46.1738	64.5228	45.1264	83.0873	65.2443	53.9761	57.5325	51.3565	69.299	70.2526	72.3153
Q13867	108.211	32.0761	58.7642	89.6129	22.8878	34.4738	42.0461	10.6147	32.8005	28.6637	64.8123	165.677	22.9275	87.701	61.0549	34.3579	51.289	31.5626	26.5034	28.1037
Q13868	48.5227	55.6895	24.8013	22.3505	36.9805	36.6325	28.5499	28.6008	22.3415	47.1501	33.9305	18.5902	35.8284	27.6323	28.3872	20.1461	25.1407	35.033	35.3794	30.2057
Q13885	204.379	290.176	271.906	264.342	287.004	143.181	179.818	164.313	122.667	135.77	147.855	143.467	149.602	186.261	164.286	231.847	135.992	180.17	193.568	144.377
Q13907	6.12311	15.3339	8.77547	18.4224	9.24116	17.0526	19.7612	18.7006	17.2643	10.2725	14.5381	16.6186	19.8615	8.3258	28.0839	11.5996	16.4726	9.08269	17.8048	10.081
Q13951	8.69489	5.30023	9.06859	15.9022	9.47795	7.89524	12.3672	3.41693	11.0703	8.61342	10.4127	8.13927	7.77158	7.34655	8.96103	6.61331	16.6907	6.9175	8.65829	6.94828
Q14008	13.9121	18.3401	20.0871	17.2315	17.7679	15.3797	22.9312	21.7077	24.5028	17.1149	14.6383	14.1785	13.0139	17.3107	20.3801	15.2701	14.0998	12.8447	13.4887	11.8183
Q14011	29.8967	12.1378	20.8241	23.816	10.5181	24.0014	15.5373	12.9432	13.2652	17.6381	24.2238	20.3034	26.6892	13.6968	19.5297	22.1664	18.1841	16.0802	25.3873	13.762
Q14019	63.2539	107.63	144.068	58.1028	118.528	103.413	91.067	67.4465	122.079	121.932	80.08	111.172	156.666	76.5269	83.2797	111.723	96.3634	97.7279	117.626	67.7515
Q14103	120.631	137.492	105.267	85.2528	96.57	133.609	88.1596	89.0456	78.1678	97.6365	104.434	55.2847	85.3339	70.6808	70.7227	98.6742	54.1403	79.7823	69.7015	78.9203
Q14116	17.4368	37.4044	13.6977	21.1406	8.01567	34.1222	44.1846	57.7168	41.2203	51.0372	17.4075	49.7547	29.6942	23.3139	23.4712	28.2501	39.1294	25.8599	53.4315	32.0622
Q14126	23.0588	19.4867	24.4078	17.6874	22.2674	30.0476	25.6152	19.9172	25.071	23.9072	25.0433	20.5678	18.5296	16.7469	20.0208	14.9383	14.8695	13.5121	8.68556	8.32944
Q14137	24.067	25.3214	15.0249	19.7266	13.5369	31.9949	16.7045	14.4538	23.504	17.8468	19.1694	18.3206	13.2936	13.5218	13.6131	16.5096	11.8451	24.0098	18.9267	13.5885
Q14151	20.7624	26.997	20.2951	21.9278	11.4021	23.3004	15.2815	16.8161	13.8105	19.7352	19.5639	23.903	22.0175	15.917	14.2922	25.7304	19.8331	21.398	15.362	22.7616
Q14152	55.7248	52.4966	61.5082	58.6276	60.9032	54.165	63.7408	63.08	46.282	39.2561	57.8403	49.6364	51.6614	52.2993	62.1079	76.0293	61.0488	68.6632	65.6137	65.805
Q14157	21.6516	23.5623	17.1149	26.9197	15.7746	28.435	24.4362	16.5206	18.244	18.0924	21.5268	20.6971	24.6839	14.3164	20.4054	19.5593	26.6138	23.0045	19.9976	21.85
Q14165	14.6108	24.3032	17.5799	14.2345	17.0814	36.5851	30.557	30.6978	20.8722	22.6719	26.8886	25.946	20.2954	22.9145	15.0987	26.7314	20.3422	15.9497	20.4676	18.2892
Q14166	57.8509	63.9853	54.3124	45.1903	40.4727	29.368	35.9477	28.8399	36.9754	28.159	22.5101	27.1335	23.0498	19.9891	19.4322	27.2891	35.0879	21.8554	25.7619	19.8252
Q14192	25.5735	27.3815	39.3169	23.1933	40.6067	36.5537	21.3311	21.9944	20.8123	5.02686	30.2925	35.9323	40.7576	19.408	21.1845	35.6647	11.2942	21.4428	23.6447	17.1447
Q14197	42.4477	37.0186	17.4358	24.6696	26.5919	28.3315	14.2284	16.4123	24.6852	16.671	27.0675	8.48422	21.0231	20.127	20.6228	20.6863	15.387	23.1005	23.2917	19.9713
Q14203	13.8441	13.6616	17.0509	13.0223	8.96683	14.0965	15.3649	10.7355	12.9979	12.5568	14.6521	11.1538	14.3196	10.573	13.2899	8.49462	10.7759	9.50884	10.6956	8.95466
Q14204	56.9604	70.1136	56.7476	68.7608	83.0385	53.333	75.1823	68.5706	68.4288	76.0335	63.3603	39.841	68.077	56.0015	60.9169	65.0306	59.0759	43.1882	57.364	49.5649
Q14210	177.952	118.777	69.4723	85.8856	34.4502	34.1171	20.1997	17.2428	28.5512	20.8958	78.9836	388.143	59.6666	31.1625	26.6893	27.575	264.244	186.223	55.6843	39.4569
Q14232	20.1245	23.3355	11.5636	16.1641	13.3188	19.7252	20.9927	20.3223	15.8654	20.5701	27.4589	22.4832	13.1176	22.8456	25.3532	22.1134	23.0778	31.2171	24.5255	25.7395
Q14247	107.721	111.963	155.733	133.375	159.883	97.1984	80.2283	122.035	101.013	127.833	67.6045	67.3198	60.3949	38.8928	56.7142	57.2171	53.6438	56.7055	58.7563	56.1882
Q14254	16.1857	7.58403	9.09646	11.6016	4.99489	7.10795	14.0018	6.46512	8.6091	4.65381	8.44406	10.6288	7.56029	8.59411	6.82034	6.79732	9.16946	5.46204	7.92605	5.17225
Q14257	16.5111	9.63049	11.5504	7.20626	5.07171	23.9073	23.1734	14.697	18.2952	17.1778	19.8171	11.7866	16.8795	23.0517	12.6538	18.9929	10.6205	9.20037	12.5868	12.2513
Q14258	28.0482	17.9101	4.53089	9.17645	7.12386	11.3541	25.3296	21.3101	14.5586	28.5102	19.497	14.3101	16.186	14.8195	17.3328	15.4624	22.071	23.9581	17.9501	19.5319
Q14315	106.258	81.8595	135.003	94.9122	216.974	134.642	127.588	138.968	133.152	95.3131	118.578	55.1299	35.2415	40.537	45.8539	19.0081	34.6113	28.7407	9.60714	1.89152
Q14318	11.9557	10.674	8.6125	6.86992	8.38488	17.5327	6.4312	25.0716	19.2491	6.25321	8.75304	7.64033	9.19039	7.79682	8.72305	13.2258	13.44	5.4477	7.44036	3.0692
Q14320	19.2277	14.2537	25.8839	16.3657	13.8398	16.1583	26.6671	13.8071	8.88107	14.9004	15.0341	8.52947	7.41027	12.1204	12.347	11.0486	11.8606	15.4292	15.972	14.4667
Q14331	30.1935	17.3598	13.8733	14.2082	7.84884	21.7072	15.2584	7.44138	11.0499	9.27923	27.3648	166.3	14.5734	16.4328	35.2851	7.84599	15.4342	12.7157	9.90511	7.56055
Q14376	10.5486	7.66978	16.1805	10.8305	14.2778	13.4361	7.8075	7.11557	11.8364	13.8884	8.65422	12.8181	15.0229	8.11662	11.225	17.8071	8.45969	2.8799	8.6504	11.4632
Q14432	41.6325	48.6688	16.0274	25.8716	10.3536	18.172	21.2826	10.0061	12.2718	9.16383	21.2069	22.87	26.3609	14.0236	25.9299	28.2937	17.8932	15.5599	11.8399	17.8159
Q14444	50.9628	56.085	34.837	54.0824	48.422	56.3106	51.4612	49.1583	56.396	22.7312	64.4046	52.5556	55.5744	53.5319	60.8174	58.9486	45.2897	54.9995	73.961	65.1956
Q14498	47.3946	46.2815	33.5161	57.1379	45.1672	96.2571	49.1116	48.7005	52.4994	51.9628	39.6308	46.3388	53.0114	46.6425	40.6693	43.8911	59.1643	67.4694	56.5869	56.6806
Q14558	14.1503	13.0643	17.8277	15.1374	18.0351	7.39498	15.8484	8.76403	20.1634	13.049	14.3099	21.1575	11.1682	18.1906	20.3839	25.1815	15.0853	16.1677	16.9727	18.8751
Q14566	102.752	68.7521	54.5232	88.1972	49.5285	54.7674	59.7146	50.7029	64.594	38.6797	55.5725	52.5866	64.6468	49.0478	44.1605	57.1898	42.6368	44.8786	51.3762	44.965
Q14574	225.965	100.412	89.8767	207.06	45.0125	49.9178	38.6608	28.715	21.5123	34.1532	328.777	376	33.3056	115.076	196.608	39.6551	88.3885	47.2071	33.9665	19.0904
Q14624	313.63	368.812	248.931	77.8263	11.045	463.175	265.497	59.5223	355.255	678.105	138.581	247.416	261.083	348.701	382.72	408.257	93.1837	23.6863	273.482	29.4987
Q14643	15.2334	25.1687	18.4546	11.0447	7.06644	13.213	12.4917	8.2367	6.36056	13.7358	12.7097	11.9402	7.8894	11.7232	7.47882	11.6903	8.03495	9.11167	10.4257	7.20117
Q14676	15.3903	9.41539	8.82125	7.13614	8.35664	14.1574	6.64099	10.6568	14.9913	8.77648	14.7147	8.94392	9.00561	12.209	8.65299	9.97852	9.22232	13.5733	10.3447	10.3213
Q14677	21.9652	14.9718	23.2952	18.0157	16.587	21.0246	23.6438	25.3005	20.9003	23.6711	25.4777	16.2825	22.0514	16.1819	17.9884	24.8733	14.6081	18.6457	17.4457	17.8477
Q14683	65.6131	44.2504	32.8718	39.9183	31.4104	44.6053	45.8453	30.6934	28.8601	33.7873	37.7069	39.3406	35.8973	37.9235	35.5623	43.0686	29.8793	40.5039	37.538	31.0308
Q14690	21.8741	6.64027	15.4629	8.43441	4.60399	9.15293	6.8091	9.84787	3.45715	10.6083	12.3287	10.0332	9.30518	6.07367	7.30908	7.5264	5.90932	14.9327	9.94407	2.93514
Q14694	13.8404	13.3419	10.662	12.2627	12.9668	12.4088	10.5408	8.49799	12.2598	9.82907	11.249	9.6701	11.4554	8.77212	8.72608	8.63376	8.05463	10.3776	13.0922	9.66642
Q14696	33.9743	29.466	26.8755	27.1732	21.6789	40.7334	33.2215	21.7336	29.3612	27.9802	28.7648	29.9441	33.6381	36.5781	32.7229	35.2411	27.2847	45.8003	37.6606	38.2212
Q14697	161.837	202.728	167.229	139.501	157.547	169.626	208.836	135.285	179.196	106.227	114.49	121.658	100.078	101.598	107.331	112.578	94.7825	79.1004	84.9354	78.8714
Q14739	39.4306	48.9038	29.0952	36.7871	38.7632	45.8471	24.9044	41.0444	23.5993	21.0349	30.8836	42.5241	42.5842	32.3763	37.8969	35.1528	25.991	33.9971	41.9823	39.1016
Q14839	38.1501	35.7583	26.1793	28.5138	24.9707	35.5166	38.7674	30.5239	31.9743	29.1556	29.6279	19.7668	25.893	27.8415	21.1937	24.6341	18.5529	28.7884	29.9718	28.4291
Q14847	97.2601	85.6749	129.714	77.1315	137.38	77.0021	56.8799	116.186	86.1847	107.258	75.3423	59.2417	72.5176	82.4186	59.3751	83.5658	73.9365	79.4952	75.6428	64.7542
Q14914	10.3405	5.82698	16.6614	13.2471	13.3323	4.37427	6.1067	13.3184	6.82559	10.0604	5.68711	8.21506	6.0855	6.66799	7.10928	6.64677	10.0819	3.2689	4.59861	5.49132
Q14974	111.576	166.464	125.069	126.885	143.474	85.1704	105.755	115.631	153.457	135.946	161.531	130.43	160.678	138.047	150.041	165.275	159.432	132.091	160.719	161.443
Q14978	52.6081	53.7301	26.8786	27.287	21.7616	49.3938	45.5551	26.775	44.5697	22.1332	43.5424	44.7254	45.2683	32.0775	29.3132	45.4881	43.0105	61.8471	47.1952	56.2325
Q14980	20.7522	17.6981	14.3559	19.2221	11.9554	16.893	19.629	13.2872	16.6296	12.5361	15.6478	13.7222	14.38	13.7945	12.454	16.9189	12.8833	9.99201	12.3452	11.205
Q14C86	22.24	23.1179	14.3272	20.7759	19.6685	16.28	22.439	31.5414	24.4719	22.1151	16.9239	18.6271	14.5507	14.384	13.9672	24.0929	10.5805	16.0266	14.2954	12.9035
Q14CN4	76.2506	60.2608	95.6469	232.685	109.541	142.97	131.547	24.2129	29.1672	66.4786	313.716	261.642	37.7317	173.198	192.952	48.5958	130.941	14.8045	123.335	63.0926
Q14CX7	19.1267	12.2477	14.4841	6.28129	10.8292	11.4263	16.2533	18.3505	13.4661	11.9102	9.63548	8.59425	8.31373	11.9038	9.23104	8.5267	4.63486	10.6453	9.22161	9.94141
Q15003	34.0724	32.1557	16.0464	33.7485	25.7638	29.6219	25.6762	37.7519	11.4879	26.4266	20.2069	42.3344	22.3818	26.9118	30.141	26.5234	19.4185	21.7347	25.1106	28.3193
Q15005	32.5541	32.4316	28.9494	34.4105	46.2919	59.6436	43.0033	40.5337	33.6211	34.102	34.9008	23.2953	31.0417	45.4951	27.0852	37.7162	26.432	33.4107	35.4385	37.3005
Q15008	39.947	42.7236	45.9912	31.7002	39.5892	29.2245	33.8336	46.6949	38.3405	49.4682	37.6289	33.7774	41.8077	35.6181	38.0754	36.7735	32.1739	31.7308	33.5147	43.9731
Q15019	28.1049	27.807	26.7068	25.0014	27.2969	18.3209	11.8082	20.7866	25.8077	17.8782	23.4755	13.4613	20.1992	17.561	15.8679	24.2405	18.2077	21.8124	22.9255	18.9362
Q15020	25.221	25.8818	22.9892	22.9527	15.7101	23.2885	21.571	22.0146	19.3003	23.8812	23.0655	23.8186	19.3449	18.4258	17.502	21.7969	20.1006	22.461	20.5335	19.4894
Q15021	22.1094	10.3256	16.862	18.3638	15.9287	23.882	29.2263	27.6376	32.8186	18.4318	16.9891	23.4459	23.359	16.3202	26.7486	19.3716	18.5473	18.8733	19.1284	19.1425
Q15029	283.376	303.595	306.716	286.796	269.73	362.795	389.984	396.977	395.573	358.457	363.372	317.374	274.401	330.165	291.048	344.99	262.139	352.526	329.732	346.538
Q15046	45.5526	45.7309	41.6324	41.7104	51.9546	52.2013	57.4935	61.3826	53.7742	59.1895	63.4109	53.1081	94.2958	80.0407	75.3409	79.0314	70.1597	103.519	83.1387	71.9504
Q15050	28.8656	16.1233	13.4932	10.6461	11.4029	32.3747	19.6765	29.736	18.2978	7.75105	19.9296	14.8297	17.4239	10.7278	15.5433	16.3731	10.0061	19.6437	19.3778	10.5313
Q15056	47.8649	49.574	53.5197	58.0255	54.3913	23.7457	27.6427	30.4528	35.869	42.2218	42.4062	31.9585	41.3689	26.5564	47.3601	43.3358	60.2597	45.6692	44.2125	48.4947
Q15061	28.2704	17.3164	17.5706	15.0989	32.4821	41.5909	11.4513	37.6203	19.0298	23.3399	15.4112	8.4559	15.3868	18.141	9.02537	12.0418	13.6128	23.0307	11.6711	21.9773
Q15063	55.4893	103.094	38.4752	20.1233	26.7249	70.0893	54.2885	29.5222	42.2511	94.9276	46.3928	60.9086	27.7783	72.3555	94.6397	132.945	19.8797	5.01753	67.3475	6.69177
Q15067	10.7737	7.10283	11.9705	3.8356	4.89985	6.09709	12.3042	13.9728	7.97016	6.47271	11.6535	9.9013	3.60513	6.84721	9.77388	11.1382	8.22322	5.39579	6.9598	6.10372
Q15075	8.84337	8.38481	9.39439	8.90458	6.48491	8.88179	5.38457	5.17267	7.34073	7.90742	17.285	6.63619	7.81288	6.92219	11.3876	9.64941	5.57828	6.87202	4.61347	5.35382
Q15084	92.2239	96.771	83.8394	94.8125	86.144	128.811	169.391	101.426	107.83	85.5179	99.0633	98.4806	114.487	132.112	113.168	125.173	82.015	150.086	89.3539	106.489
Q15102	46.9927	33.4166	32.6768	38.6758	13.345	29.1114	42.8619	24.9882	20.1841	27.5383	31.0839	48.0098	55.5059	46.5519	52.2559	42.8896	50.8875	40.3342	39.3281	42.0005
Q15126	18.6643	30.1781	36.8176	30.9454	29.6857	25.6214	24.309	26.1286	17.1157	17.9534	16.4311	19.0724	29.9802	25.0615	19.9389	29.3679	29.8689	17.0028	23.0651	23.4418
Q15149	165.439	144.438	138.441	131.036	130.466	149.163	111.459	113.59	116.119	110.419	113.26	82.0393	94.9829	92.6901	94.6152	99.5218	77.4814	85.9782	97.5532	92.1724
Q15165	15.8619	5.70215	7.42739	5.74966	10.2674	10.2068	10.9505	5.86457	3.75049	3.68231	16.4159	14.9963	5.47104	9.56272	9.02057	18.734	10.9992	13.323	11.5682	8.41369
Q15181	71.3362	63.647	64.9243	81.0543	59.4362	87.188	97.0413	65.9409	100.905	85.209	176.849	194.857	140.507	152.938	175.261	176.525	232.793	201.957	171.318	173.146
Q15185	35.2033	37.931	49.4468	24.0088	36.2102	20.1334	48.7337	21.8407	28.7851	22.2163	89.4437	103.97	85.7421	84.8073	94.3954	103.871	98.8993	66.7015	79.7911	68.5166
Q15233	278.013	231.349	188.83	197.451	208.452	185.745	88.2733	160.633	122.251	157.079	149.078	131.03	140.526	114.04	109.904	139.606	85.7541	143.443	158.015	167.674
Q15257	21.5941	15.6051	40.3995	14.3307	24.726	28.8623	29.8507	27.644	33.1201	34.2873	18.4198	20.7825	14.2648	20.7611	19.0932	12.7544	13.818	17.7734	19.9699	17.9748
Q15269	15.276	14.7216	12.115	14.974	14.5183	33.4039	13.5004	13.6075	21.4854	15.8962	14.4753	5.58136	14.0592	10.6952	12.2887	9.30842	9.11756	15.482	14.0415	11.5654
Q15286	9.29775	10.4681	4.51594	13.0312	11.5858	13.9198	6.98098	7.70998	9.10916	12.3441	30.2487	15.9063	14.0218	10.6935	8.3908	7.61992	6.18378	8.59692	5.49585	5.9657
Q15287	36.4782	46.8151	33.8187	43.4609	33.6817	25.7581	23.7935	26.6851	28.3151	26.7232	30.6047	22.8935	36.6107	30.0738	30.3186	27.0371	26.1082	37.5461	31.2223	32.285
Q15293	70.4758	83.3441	73.5429	77.6007	69.8857	59.551	73.8627	94.0982	67.0512	50.9761	148.282	182.366	123.201	164.488	170.113	187.767	91.5939	121.272	124.341	156.47
Q15363	32.6121	11.3458	1.01237	12.4838	7.21991	12.5345	16.2716	12.6382	13.7081	13.4652	26.9124	33.7389	20.6101	29.714	30.2207	36.7906	23.0824	24.659	13.5308	13.2746
Q15365	107.03	126.433	76.9768	90.4817	106.556	102.29	118.315	58.358	100.11	66.1191	118.184	101.943	91.6816	91.6854	89.6481	141.935	101.302	161.99	127.104	141.024
Q15366	203.364	163.894	135.862	132.385	128.69	205.309	209.102	168.956	189.316	165.134	149.83	121.026	178.056	168.973	179.834	181.464	198.744	182.268	185.927	203.322
Q15369	43.2053	65.6677	75.0833	51.9822	62.2026	21.1576	24.6396	36.0428	38.2089	51.7948	26.6604	34.5113	23.4172	23.6553	25.203	30.0061	38.5561	27.9838	25.0688	32.4049
Q15370	26.5393	29.7074	46.0615	28.5036	36.3504	33.6457	46.248	29.3752	39.5742	47.3317	24.2581	30.1236	28.6471	12.9059	18.1414	28.9725	24.9306	28.9753	18.5386	18.2001
Q15382	28.8756	21.2091	30.7634	25.2873	43.6562	36.563	20.5246	33.7179	33.7525	25.4275	20.9506	26.817	15.5751	16.1878	17.1258	28.5345	15.6887	21.2248	29.7333	24.5413
Q15388	35.9959	43.1766	39.3172	74.4213	52.1182	83.7952	11.708	51.2801	21.4272	14.8007	34.7105	39.7092	37.9539	43.5745	34.5468	31.0599	14.8301	35.9767	28.0766	31.0093
Q15392	36.8304	17.456	14.356	37.4884	57.3287	29.215	12.1312	65.5951	34.4687	27.545	23.2906	10.2513	21.2078	13.1301	21.9962	16.0739	20.0663	21.1603	30.6588	25.7789
Q15393	81.961	66.6528	67.6332	63.8408	60.7787	80.8721	51.6231	56.5404	60.3084	61.6756	79.4626	75.2598	73.9373	63.7316	69.8118	72.2549	64.1848	92.1889	81.8262	71.9597
Q15397	11.3432	5.08646	4.63728	7.09717	12.8348	26.5557	10.3685	10.8409	15.3465	13.048	15.7444	6.40139	8.64156	14.179	7.69358	10.3087	14.4342	15.3497	13.4028	13.1407
Q15398	5.91019	12.2729	13.7344	21.7929	11.872	7.5037	28.3667	11.4233	13.4203	20.1435	4.03327	7.46713	23.6841	19.8106	14.0461	16.7136	12.8033	7.7565	11.393	13.9576
Q15404	41.6576	56.1096	55.8373	35.6312	73.5938	33.9613	30.3679	42.884	25.7923	34.5678	19.9336	13.8933	14.2744	15.799	21.5948	15.394	24.321	14.8174	20.132	15.1635
Q15417	51.8074	50.1978	88.0681	47.2185	140.758	43.2223	22.1037	23.9945	29.2003	36.9584	57.0267	61.1747	68.7843	59.8856	63.2254	59.3518	60.3847	56.7535	57.8312	61.5816
Q15418	9.15808	4.70956	4.18106	15.1995	6.75386	4.6994	21.1634	10.4173	20.3474	16.6018	12.3591	8.52651	10.3888	6.18513	12.7492	8.51047	16.0348	7.22946	10.8916	9.86646
Q15424	37.2466	31.7284	26.884	23.1706	22.4597	27.6867	28.2827	32.6922	27.2737	28.1883	18.5531	21.7861	26.1855	16.8612	17.9921	20.1896	16.6235	23.0976	19.5017	22.4159
Q15427	30.2618	22.9775	17.6252	26.025	27.9679	26.8756	36.6236	31.5548	29.5341	26.1225	14.6593	19.1733	14.4865	16.1747	12.4321	17.7815	22.924	18.7931	17.0398	15.5688
Q15428	35.8188	30.5126	28.9678	32.3091	25.7277	39.8512	28.48	36.2892	39.1117	51.8562	30.3736	25.0629	24.7354	26.0929	25.3765	15.94	17.7358	29.2738	21.8782	29.7299
Q15436	25.5093	27.3974	42.0062	21.8208	36.8469	28.1121	29.0667	18.2441	29.1473	24.2969	18.6083	17.84	20.589	21.3759	21.6519	24.4728	17.7062	13.6464	24.8463	18.4608
Q15459	63.1419	49.1551	43.0595	39.4554	35.9682	57.9835	45.117	50.5051	45.0867	49.2054	52.5252	50.639	45.9806	39.3645	38.9472	56.2715	52.7238	52.9588	46.8822	47.681
Q15517	1104.58	378.286	358.848	802.426	153.337	148.132	159.527	156.39	134.657	112.031	1231.67	1288.25	120.016	386.612	607.604	54.0991	151.438	37.9111	59.1688	40.0801
Q15631	21.5785	15.3755	21.0742	13.4697	8.93595	15.5532	24.9784	16.6255	20.229	23.5864	28.7857	26.0572	34.0456	32.6484	28.4736	23.9875	28.0005	26.9174	23.6527	26.2748
Q15637	41.9389	45.771	32.1556	33.6516	21.2864	33.1094	21.1496	30.2205	30.4478	20.5961	16.5649	29.2376	24.8477	22.6353	16.923	36.0667	21.6993	31.5662	26.846	24.1017
Q15645	62.476	102.794	95.9886	76.7207	89.1997	97.6155	143.389	93.9519	143.267	96.7408	58.3577	65.3775	67.852	64.9397	64.3532	64.1306	56.6096	63.654	53.6455	59.0265
Q15654	18.9081	18.1632	14.8723	5.12656	13.0241	18.2787	15.8842	13.9063	17.5087	13.7853	28.8152	26.4694	15.34	22.1082	21.9653	37.7425	25.2216	29.4172	24.4112	19.4525
Q15691	41.7839	43.9132	45.637	43.1493	43.1722	61.4961	49.5702	59.5011	52.2511	72.827	29.425	28.4768	32.6464	38.8848	45.7515	43.5287	27.6361	44.6321	37.4865	40.8727
Q15717	109.827	84.9044	82.1048	89.015	66.0035	86.5409	79.9306	83.9998	83.3361	60.8526	71.1339	49.1515	79.3639	68.0547	71.3139	77.1717	57.7648	64.1103	78.5019	71.4769
Q15738	12.0681	13.7055	15.3573	12.007	11.8753	12.6764	5.99191	26.2394	11.8885	17.312	8.30368	6.44921	8.22313	10.3822	9.00413	12.5879	7.19222	8.38278	10.9244	9.15763
Q15758	37.151	22.7947	25.3995	21.9377	37.6675	88.6389	29.9249	66.427	29.8189	51.3147	36.3616	34.4536	30.4572	29.7959	28.1234	28.9626	23.6077	30.5859	36.5098	37.7434
Q15785	44.5659	58.0451	45.7467	46.1662	62.9789	55.6268	51.9384	49.5972	49.0823	60.3984	55.3245	46.4754	52.1036	68.0563	46.4368	51.9685	44.1089	63.0906	45.3552	60.8533
Q15796	13.8635	17.9151	9.62946	13.8238	6.43413	17.4234	14.1873	10.2328	18.0165	7.52905	4.38226	8.66971	9.59036	7.23825	15.8531	5.68658	9.81886	10.8951	9.37767	9.12411
Q15819	16.9411	15.3589	13.8829	8.76837	11.3553	17.532	28.345	19.2179	17.2167	6.8438	20.4457	17.4049	9.28795	12.8861	14.3254	15.7747	13.9957	9.09209	8.18265	11.9056
Q15828	173.601	73.6657	71.1962	69.8039	42.7066	15.009	23.4546	12.8219	14.3376	14.0894	121.81	824.169	46.3044	43.2375	34.9691	31.4908	118.012	70.0404	31.4502	33.6227
Q15836	13.3098	8.96552	12.532	9.67415	19.0069	16.424	4.57229	23.6989	5.53468	8.16791	5.74584	4.58601	2.25316	4.90656	9.75024	5.30916	4.1138	6.4396	4.65468	3.57553
Q15843	237.013	49.4995	189.921	82.5995	127.413	54.12	41.0292	34.7452	51.5962	33.6684	29.5072	43.1159	31.8507	29.6747	36.5772	63.4077	38.1866	27.5576	35.8079	30.1732
Q15904	32.4282	33.6658	23.5165	16.7553	26.1014	22.4952	16.5581	20.9148	24.5842	26.3878	29.3353	30.4982	12.3623	24.043	22.2501	19.2067	22.3678	21.088	18.7513	17.3977
Q15907	188.295	174.166	187.089	117.11	216.226	158.244	119.559	205.74	127.219	169.365	140.267	132.016	155.694	137.658	127.648	189.192	112.364	127.045	161.751	105.811
Q15942	27.9213	15.6932	49.7821	14.0891	35.0409	81.2136	33.495	90.8806	39.3043	26.333	20.4904	30.1408	31.6885	27.2329	12.8275	16.7645	24.3672	17.9545	31.9117	21.05
Q16181	22.9118	26.144	16.661	21.8794	19.4053	15.5035	16.7398	16.6798	21.7103	18.8001	18.7512	12.8071	17.0393	17.3049	15.7298	14.7222	17.3864	16.9319	20.9789	13.9615
Q16186	49.7532	20.5201	52.9025	41.3135	32.6594	24.7405	12.7957	13.2415	12.6451	28.9281	28.4	47.6809	23.6123	14.0862	18.1227	17.2871	34.1401	45.5178	28.6431	22.958
Q16204	13.8284	9.79715	9.19783	17.0156	17.6336	20.6194	10.2833	18.993	11.7992	17.8891	8.34721	11.367	15.7099	11.7926	15.1206	13.2723	13.8329	16.226	12.6049	10.9931
Q16222	51.4827	27.7737	53.7242	17.9809	44.3488	19.9139	34.3114	17.5237	17.6913	24.8268	25.5967	31.6144	28.0543	31.6894	30.5617	31.4871	30.7144	16.4127	25.5116	19.2135
Q16378	149.299	53.7491	97.9719	72.2557	34.0972	16.0304	16.0531	5.20641	5.97371	12.6747	370.367	550.068	65.0736	300.911	78.5808	86.2695	157.997	38.578	85.2069	66.1156
Q16401	67.618	70.0084	81.8727	70.7437	63.0611	48.1931	54.1818	60.3697	63.7542	83.729	38.6827	39.7993	26.1857	38.1834	36.9541	39.265	28.069	30.4337	33.4173	42.553
Q16513	24.8508	17.4906	18.5762	22.6402	16.0618	22.0442	13.9443	15.3533	13.1316	13.983	19.6656	12.0007	15.2423	8.23745	16.6438	22.5439	17.0032	12.8678	14.3662	12.039
Q16531	96.7839	75.5292	77.8662	75.6072	68.6585	81.1134	89.0515	80.3122	89.9165	83.9815	100.598	110.869	93.4253	83.0134	96.6752	106.61	120.518	84.167	104.707	76.0696
Q16543	71.5028	53.8798	63.7521	64.9314	69.1096	41.4268	59.3283	63.1567	57.6277	69.2124	75.1352	70.8417	58.1662	61.7074	78.3647	81.8149	61.6422	74.6296	75.9941	65.3489
Q16555	87.3958	83.9518	46.8165	73.9502	26.0348	22.7124	40.9565	67.7812	32.6141	37.0466	34.8811	47.9091	79.1255	42.1776	49.0421	55.1164	89.3202	52.839	51.9118	33.2971
Q16563	50.3677	46.0516	47.2964	41.3128	34.0368	39.2028	50.346	97.8594	59.4224	49.0091	52.4324	63.7682	11.9892	28.0342	39.4195	21.5325	37.7987	21.3212	16.975	19.4994
Q16576	28.7684	45.3875	28.2192	26.716	24.2797	26.6869	33.0681	29.2872	26.534	37.0223	23.9273	26.2909	43.9138	26.2433	25.2163	36.6355	26.4248	23.1255	28.1586	21.1593
Q16610	40.5073	11.3055	12.4348	55.4796	7.12511	18.7667	17.0017	10.8857	10.6967	12.1287	52.3595	71.5081	7.69505	34.5645	41.3077	10.3476	27.0843	10.5766	10.5291	5.06174
Q16626	2.96444	8.58245	13.6782	3.79885	8.67185	7.37211	9.96945	13.8954	6.59395	4.76153	7.18512	5.82648	6.36034	7.05712	3.3104	3.79099	3.50017	5.6294	5.37069	4.80995
Q16629	159.136	138.109	107.929	104.423	125.518	164.443	138.435	176.024	146.453	165.384	151.836	74.4293	170.063	161.251	118.723	132.542	95.0257	186.933	137.671	180.624
Q16630	65.3919	59.1016	38.2601	64.0495	36.9703	52.0754	42.2893	38.7651	45.3809	54.367	52.9145	44.5263	55.2804	45.4959	40.0402	35.3115	50.2338	45.0784	53.0821	47.1541
Q16637	17.4717	9.82754	8.94886	9.91225	7.62937	10.4486	13.4635	10.8865	11.3841	14.9192	7.56978	14.313	10.9413	13.1178	12.3007	13.3804	14.584	17.003	11.6683	12.5031
Q16643	61.9601	76.0766	31.2831	37.6779	53.6686	62.1544	34.8409	43.8308	38.06	33.2528	42.6374	37.5355	55.8898	25.4831	28.2488	27.468	42.8932	33.7648	55.9514	35.3811
Q16658	162.633	257.322	373.329	190.648	382.742	245.086	254.575	272.669	298.042	274.965	167.811	204.531	219.445	152.794	190.671	102.009	202.594	210.825	221.618	176.648
Q16698	16.3077	41.7465	21.6641	22.1625	23.3634	28.8828	18.9066	26.2905	16.9109	10.1409	21.8394	25.3563	25.3347	31.479	27.4606	15.3354	21.8045	17.8316	25.5888	28.5285
Q16718	22.6848	1.11622	9.82383	4.43556	12.6031	16.314	5.3003	11.2905	10.5398	8.7662	44.2591	39.5707	27.4133	28.7875	26.8994	24.2426	34.3769	27.7079	23.7007	27.4151
Q16719	28.1889	28.7536	27.6582	23.1178	23.697	15.1552	24.8544	25.6402	19.3131	23.4085	42.5467	82.0786	45.2048	50.8172	44.0099	75.5048	87.9193	34.3267	39.5612	43.6538
Q16740	24.0548	22.4807	23.9645	10.4574	9.27532	13.2309	5.02105	5.47167	6.30827	7.24869	21.5073	19.2502	2.80747	7.22125	15.83	12.5765	13.7899	13.1592	11.3459	11.0956
Q16763	7.75446	16.4441	37.5038	41.3052	31.4073	22.0549	29.953	33.1283	30.0741	31.9729	18.6414	5.73582	15.7852	25.8	11.1876	6.36078	7.24081	6.23071	9.27617	18.2831
Q16795	18.5464	8.54892	17.1954	13.0349	15.5045	30.2917	17.2667	23.9135	17.4333	15.2881	16.4923	16.1291	18.8624	19.384	15.0353	19.1255	13.329	20.1953	18.2669	26.6185
Q16836	44.4968	30.6687	16.4426	21.4126	10.5607	29.3162	25.616	23.7436	22.5006	14.8666	19.2015	18.3638	14.3273	18.2817	22.6915	10.2644	10.4765	14.7992	16.4301	15.3511
Q16851	17.5037	35.5908	37.4715	21.4366	48.3625	14.6481	28.1523	28.0437	26.8527	25.8962	25.4691	35.3663	32.8831	23.324	29.8106	32.1876	27.0631	22.7533	32.1657	28.8922
Q16881	54.199	35.8931	65.7882	54.7608	56.3831	14.5362	44.9657	26.917	37.4747	54.4894	15.6383	25.9777	19.2328	12.1839	11.6417	18.9289	29.5122	16.7926	19.9017	16.7511
Q16891	32.7153	27.1589	15.7098	18.9492	28.9629	29.8686	22.3366	24.3482	21.6196	18.0866	33.5533	24.2188	32.961	36.4324	28.1023	27.8492	24.7087	43.0306	35.3689	37.3324
Q1KMD3	42.1868	41.1824	25.8001	31.4309	17.7052	35.301	44.742	32.6753	35.2276	24.3222	25.486	14.5775	14.7563	16.1174	22.5026	21.2228	14.3239	13.7016	20.9402	15.0664
Q29RF7	12.9016	11.1723	6.0913	9.65661	7.9144	10.8297	10.3506	5.65454	7.26199	9.34298	6.79996	9.80376	6.95097	7.10226	5.51399	7.91329	5.15897	4.08808	6.62884	5.62845
Q2NL82	16.9012	13.9717	9.73981	9.1867	10.2843	21.5319	12.5043	18.3544	18.7313	15.5403	18.1085	12.1422	16.8596	15.7042	16.7674	18.2787	15.3749	22.8146	20.3198	20.2048
Q2TAL8	7.15542	6.6036	8.7369	9.81906	5.26087	3.28943	8.06079	14.3676	2.74172	7.26977	6.97031	6.37266	7.05964	3.86192	3.9061	6.62731	3.61565	3.07474	3.72353	4.11573
Q2TAY7	26.5717	25.0316	13.1378	12.3009	14.5214	22.0774	21.1112	11.3589	25.2596	16.3685	16.0917	15.6745	14.9177	11.9617	12.5764	12.5563	10.7851	15.7265	13.4931	15.5575
Q32MZ4	11.652	11.0323	22.8832	10.6277	16.6565	7.96092	13.9389	18.1583	10.4738	20.2663	16.2665	12.1823	12.7253	9.91551	11.9502	11.7301	12.9858	8.53753	9.97613	7.83646
Q32P28	23.5488	24.365	20.7832	21.1925	22.502	16.6471	18.4989	10.3887	12.5346	20.6528	22.3955	22.1575	24.3911	15.8138	19.624	20.2665	20.4336	9.34195	17.5483	13.298
Q3LXA3	9.31348	9.58823	9.44009	6.82979	3.18764	5.62211	11.6804	1.12208	2.61434	2.74852	9.16295	9.55536	10.0587	8.43237	15.8213	12.987	12.9705	8.86965	9.58973	8.62888
Q3MHD2	40.6146	44.0381	30.2986	13.4452	25.4271	11.1151	28.9607	18.0513	14.3427	19.2039	16.8049	16.18	8.26589	15.818	18.3552	23.3706	25.5722	18.6454	20.8825	23.0617
Q3ZAQ7	51.5617	17.0549	48.0806	17.2966	77.2054	82.6924	35.1435	64.3842	66.4463	72.7571	31.8197	18.9	25.5181	38.3957	29.9375	38.4506	24.2115	44.0106	47.3184	39.4167
Q3ZCQ8	12.4712	15.6486	8.20708	10.3654	7.25468	13.822	7.69273	11.3138	5.83029	10.9772	4.97629	6.36623	9.07336	7.71271	7.19742	8.96192	3.67593	6.42616	7.17372	7.37035
Q4G0N4	10.5619	25.9582	12.0223	14.0153	9.71331	10.8595	14.5463	11.2149	10.8161	7.28494	11.1352	8.27371	17.3839	8.38543	12.7965	6.0489	12.9304	7.83112	8.50051	10.2924
Q4VC31	8.42391	10.8841	6.99734	15.1444	7.96744	10.6242	4.0506	8.90623	7.24557	9.02104	2.83817	3.69492	7.02417	7.14625	3.8055	3.284	6.59299	5.5988	4.22235	6.41409
Q52LJ0	35.2179	11.6784	11.3279	10.433	10.7306	20.2047	14.7508	19.6521	22.0425	24.3099	15.4039	11.6052	11.1074	16.8006	14.2886	15.6806	11.1686	8.71442	14.6337	12.7393
Q53GS9	12.6977	17.506	11.8872	8.6507	11.9338	18.4978	8.28859	16.4508	11.9848	12.0054	15.3771	12.9418	14.8408	14.1431	13.4573	11.4373	7.37552	20.0367	14.292	16.6531
Q53H96	11.3503	5.0609	10.031	14.7818	8.14414	13.3739	13.5236	9.44518	9.00678	9.37285	12.828	9.74749	8.56255	10.0255	12.8125	13.8883	11.5626	9.12619	12.4129	17.5668
Q562R1	1709.82	3895.11	13235.8	3940.07	5552.81	2029.39	2706.9	2531.02	3970.95	2062.76	1281.33	1518.12	804.958	1046.09	1539.41	2177.63	2105.44	1622.53	1789.08	1780.73
Q58FF8	20.3732	44.3334	38.5428	20.5439	42.3247	17.7987	41.6793	59.3003	54.7821	55.5194	23.3136	34.0243	49.4526	44.0774	31.4321	54.6606	34.4132	47.4874	50.9712	60.0018
Q5BJF2	70.0072	9.95783	15.4207	29.5824	23.7316	52.9258	33.9425	61.4776	43.9176	43.0539	46.0234	28.0906	33.5864	41.2036	26.9455	27.9056	29.4906	36.7131	33.0412	22.3045
Q5BKZ1	21.5612	17.5	23.4431	18.4227	17.7035	16.6675	14.5508	26.8853	15.423	21.9153	18.8554	20.2591	19.5775	19.705	15.5706	16.4366	11.6082	13.053	15.4969	19.7624
Q5D862	44.8463	18.2379	23.9787	63.8059	15.562	25.8059	11.6264	11.9981	13.2223	17.8681	67.2896	144.377	6.9754	38.4058	66.187	5.28149	23.1314	7.82933	7.43692	3.9234
Q5H9R7	24.4999	20.664	16.977	14.7043	10.9633	27.4647	13.2336	18.2147	11.3712	19.4916	15.5717	13.8406	9.50381	10.7678	13.2217	20.8646	13.3399	6.92169	10.5886	5.9052
Q5JTH9	27.8638	16.1401	13.405	12.2348	13.5403	27.8086	15.2362	20.6404	17.0653	18.5635	25.8984	18.0494	19.8513	22.42	17.8271	22.0963	17.2221	35.8509	28.3464	21.6317
Q5JTJ3	25.1825	36.0399	12.2113	30.5384	18.6869	17.026	11.3491	9.08067	10.2639	19.2086	19.9188	23.2168	19.2276	11.9878	25.7701	25.1606	23.7794	32.4836	33.6068	28.135
Q5JTZ9	6.56418	11.6052	9.54814	12.1361	9.77008	13.8028	6.31776	3.73141	7.23644	7.77635	9.94227	9.43197	6.50923	7.56721	11.8946	6.09018	5.55857	5.28101	8.01781	4.42532
Q5SRE5	14.8008	12.2228	8.76736	6.1126	3.03781	11.8226	8.57597	12.2251	12.3306	8.34001	8.63624	7.05121	5.92844	8.50651	5.32821	6.93411	8.24876	6.2134	6.3798	5.53092
Q5SSJ5	25.7046	16.1306	25.8225	26.6486	13.8355	18.0417	13.652	24.4828	14.7235	13.4959	27.7995	18.9822	31.8923	17.9016	24.3014	21.9942	19.1896	14.5867	27.5502	17.0595
Q5SY16	11.7788	22.4512	8.40232	4.13331	10.3835	21.7909	12.781	9.93377	12.4223	11.8904	19.0047	8.22592	18.0274	16.0015	11.3099	9.38148	11.4502	9.28947	10.3526	10.1496
Q5T1J5;Q9Y6H1	5.50575	2.82667	2.01095	12.1999	10.5201	12.7415	18.188	18.5148	3.60541	9.26235	44.6709	57.3242	46.2964	30.9481	58.9073	12.0198	66.7566	27.2035	23.2474	52.0048
Q5T4S7	15.9312	13.3358	11.3885	11.1919	15.3396	11.6439	16.1598	13.2488	11.8869	10.5399	14.469	14.4771	17.3449	13.5971	15.4731	12.357	14.9011	14.417	13.6227	11.5706
Q5T6F2	16.9766	13.302	15.4588	16.359	10.1168	13.2906	26.1564	23.2022	23.2883	17.4137	7.94845	9.56415	8.16708	7.76939	4.11586	10.8477	7.76815	12.0379	8.61912	6.16571
Q5T6V5	8.85156	9.80245	23.8313	17.992	12.6293	12.7942	14.7536	13.7646	13.8027	10.2842	6.51662	15.3729	8.24668	9.00371	10.3878	13.294	14.375	12.227	8.46905	10.1396
Q5T8P6	8.54529	11.274	3.52474	3.8449	7.17062	6.89021	11.9824	9.24015	5.12074	9.91247	2.24584	8.57003	6.55935	9.50785	5.29834	8.67778	9.43239	7.76669	8.41572	8.89433
Q5T9A4	4.38948	9.06651	13.6536	8.71531	1.7686	28.9473	13.9805	18.6694	20.9135	29.4688	19.1005	28.3097	32.76	26.4731	23.4268	15.4171	9.44286	23.8682	17.8466	18.1239
Q5UIP0	27.0558	5.43752	5.87526	25.8924	7.13368	11.441	8.18867	6.85821	8.1201	7.62117	7.77605	13.7237	7.42052	4.77662	3.01108	9.41713	6.12465	7.71523	7.42847	5.44115
Q5VTR2	16.8849	10.298	5.54644	7.95357	7.594	8.69469	12.0581	6.99183	5.25459	5.43507	6.0037	10.294	4.52716	6.66364	3.64279	4.80678	4.76923	5.11976	6.13566	6.28645
Q5VW32	24.7089	20.1291	26.2922	19.4624	11.1646	13.1058	14.7769	9.83403	12.8216	8.85001	12.99	20.8946	9.25215	10.5583	16.7462	10.7403	19.1055	5.94793	13.1381	11.2285
Q5VYK3	10.7808	9.78388	15.037	14.3643	12.8144	11.6053	13.1157	12.8735	11.9361	10.8139	12.9814	10.3063	12.5689	11.8757	10.9298	11.2489	8.37807	8.29842	7.98135	10.2952
Q68EM7	42.0379	26.6157	37.0693	47.0582	40.9928	23.7608	36.2608	29.5279	46.582	22.9927	12.4924	8.67459	10.7962	6.37161	13.5889	12.9831	7.12359	13.1492	10.6639	10.897
Q6DD88	3.16566	3.09705	7.74379	2.33869	4.17719	6.67478	3.37168	3.35525	3.41498	3.32735	6.0864	7.58779	3.65136	9.26092	4.43078	4.22143	2.63609	5.32491	5.14449	4.8871
Q6DKI1	23.6012	8.43473	3.85488	22.253	13.9159	23.402	6.30817	28.8263	13.4739	17.4115	18.2445	9.26654	29.6302	9.30866	13.0271	14.7862	13.2307	32.0221	19.0931	14.7996
Q6DKJ4	9.80783	11.4248	30.1489	18.9791	17.2624	9.95371	22.7747	5.70326	25.2211	13.3241	5.34134	6.17672	4.39113	8.37819	4.55101	3.47676	9.02596	3.98529	8.76291	5.00501
Q6E0U4	76.3109	53.0606	56.0048	50.4352	32.1618	15.4396	13.5217	11.5892	12.5664	13.0997	76.7887	223.538	51.3901	23.9203	22.7589	22.818	321.145	198.601	19.673	17.6613
Q6FI81	22.5646	35.7665	31.4961	17.4999	18.3019	23.0568	35.8507	26.0768	24.9107	24.7505	36.0573	49.4783	35.8932	31.4246	39.363	51.2699	44.0578	44.7022	44.6329	39.1245
Q6IAA8	30.2512	39.6617	31.2512	14.9417	33.2441	11.7457	6.95543	16.1755	8.36646	13.7153	12.464	16.2961	15.3209	14.9773	9.72301	20.1221	6.9158	8.77233	11.9023	10.3327
Q6IBS0	37.1397	45.2402	44.3755	37.7293	33.2942	18.3624	30.8474	21.867	26.2352	30.8429	32.7137	23.1225	41.9117	25.0226	31.9658	28.5541	39.44	34.7889	27.1511	24.868
Q6IN85	8.78529	17.2721	3.07246	3.742	2.8365	14.9468	21.1407	8.46579	5.16491	8.7238	9.16759	6.12154	8.30421	6.68894	8.59188	11.4463	5.88069	2.86968	5.98248	6.67196
Q6KB66	178.92	45.1086	58.5583	193.583	24.4238	69.2484	90.3235	50.8382	37.2284	49.8566	417.673	298.655	13.3421	107.394	251.147	24.2653	57.41	10.7183	14.6429	10.0308
Q6L8Q7	25.1957	13.9731	17.3319	16.1205	16.6358	27.3944	14.7532	10.2885	19.2496	12.5707	16.0182	17.4492	17.7101	10.4882	9.30348	11.9772	13.8576	11.991	11.5048	13.0099
Q6NUK1	30.9738	19.7857	23.1072	20.6912	34.1413	27.599	20.8204	27.8774	22.0873	17.9636	32.6935	17.3471	35.0526	38.7996	22.4926	27.1894	9.0418	27.5468	31.6232	28.3846
Q6NUQ4	10.0045	12.277	6.46789	14.2189	5.85907	9.67394	9.35226	8.01482	11.2476	6.2351	11.1846	9.60587	8.03779	8.58384	9.80861	18.0262	7.26384	20.9038	10.1032	6.92413
Q6NVY1	30.9035	13.4313	18.5319	17.5426	19.1727	15.0825	17.6709	39.2249	36.1322	14.666	14.2205	8.9891	15.5745	13.3865	13.0033	9.14411	10.4974	11.4141	14.7184	11.9824
Q6NYC1	5.3482	10.3749	13.0457	14.6509	11.938	11.1672	7.08457	13.2454	14.2313	18.0244	7.3183	11.3498	8.60683	4.73799	5.44338	12.2973	13.9664	11.0383	12.6303	14.2497
Q6NZI2	15.3853	16.7096	20.2023	16.3052	28.2478	22.1089	15.9488	34.4863	13.31	23.7128	13.7462	13.8297	11.5981	20.9827	6.70022	13.9366	11.8018	11.3343	16.0515	9.76006
Q6P1J9	26.1109	15.0479	12.5894	17.8952	14.7445	10.7729	11.9064	13.7286	15.7274	10.244	15.9045	16.5993	18.6535	13.6421	11.0199	18.4535	11.0315	12.1428	16.75	13.3703
Q6P1L8	5.73657	6.98386	6.62548	4.94922	3.14183	12.1523	10.484	9.21662	7.88445	4.94688	10.5036	3.4518	9.22202	1.62722	3.97953	7.09234	2.32215	5.35809	6.3058	7.39679
Q6P2E9	32.5094	22.7583	21.7886	22.3533	24.479	22.0256	14.0093	16.1172	17.7287	17.235	21.4493	20.5406	22.5857	16.1151	20.5437	20.8061	20.9415	28.6541	21.2996	19.1086
Q6P2Q9	54.8705	41.5912	32.6359	47.3137	38.077	61.2612	49.2413	53.5423	57.809	52.2454	48.4226	40.7166	44.1823	43.4046	40.8596	48.9268	39.5232	57.0192	49.5133	43.7014
Q6P4A8	60.1324	22.4629	22.8266	20.935	4.23929	11.9879	10.4138	9.27175	9.80957	6.4054	43.0151	72.4951	5.74653	17.654	35.7105	6.75748	24.1052	23.9222	6.60459	5.78153
Q6P996	39.5493	34.4522	32.4886	30.9122	25.0276	37.036	30.6166	31.1529	34.8712	15.4528	25.8783	25.4667	26.4508	11.4802	24.1869	26.9907	14.3608	37.5465	24.7497	15.6462
Q6PGP7	5.97309	7.64668	5.725	6.68918	4.29875	7.53863	6.72491	6.50237	12.8481	7.23364	5.04151	9.25788	9.41714	5.29785	6.18791	5.97321	8.63255	6.27503	5.22174	5.38723
Q6PI48	23.4795	15.0572	12.1314	8.69029	14.4942	15.9185	12.4124	12.073	13.0503	9.90087	15.0177	21.9315	18.7181	28.0961	14.2923	11.9501	25.2541	14.1829	18.9712	20.4492
Q6PJT7	5.90464	8.59656	18.2217	4.51474	6.26922	10.5719	11.087	4.85032	12.6001	7.32869	7.12419	7.66969	10.1545	6.42739	7.03409	8.74549	9.15931	5.73704	8.1618	6.81815
Q6PKG0	36.1167	48.3913	29.0896	32.9149	34.5274	49.547	66.4739	55.6106	49.5338	45.8877	45.5882	46.4487	39.746	39.0175	50.4302	45.826	38.2996	40.5352	41.3871	41.8154
Q6RFH5	11.4449	7.40819	15.9524	12.6541	10.0152	12.0483	10.2465	24.4538	8.56765	12.7303	10.8896	9.85943	8.60231	11.8091	12.1891	14.1972	9.50167	17.0143	13.2739	10.6651
Q6UB35	29.2357	21.507	21.7598	14.1527	18.0508	30.2448	18.9246	29.7963	14.3238	17.7454	24.6884	16.9263	21.1867	20.7004	16.9694	16.4302	14.4519	23.9189	19.9131	20.0423
Q6UN15	33.1901	26.1351	21.4128	26.5284	19.2308	13.939	9.40263	8.74056	23.2472	12.9296	13.202	22.6168	13.0603	16.1823	15.7307	16.6672	11.7767	10.9068	12.5138	20.9458
Q6UWP7	31.3853	11.2696	18.5447	15.8931	19.4462	21.6583	25.7805	12.9218	13.6213	13.0149	18.6105	14.6529	19.5981	17.1016	9.04663	10.6912	4.07271	13.5267	10.5893	9.28661
Q6UWP8	229.52	133.306	155.512	176.506	59.6879	45.5647	34.6694	25.2623	33.3047	29.8492	322.611	669.622	132.757	113.106	130.485	61.2961	408.556	283.126	48.9003	61.4289
Q6UXN9	24.5324	15.8587	15.6508	8.47111	12.6746	16.2752	10.2255	11.0612	14.9719	15.0111	6.77615	5.40994	11.8713	9.18244	5.91222	7.77732	6.88504	6.71576	8.63882	8.33831
Q6XQN6	31.0752	52.9932	14.0984	25.3862	12.9661	18.7633	21.9915	11.8918	16.5019	20.5055	26.2687	41.9075	30.9555	24.169	29.6699	36.8744	34.2935	27.7162	27.2234	23.7205
Q6YHU6	590.587	308.89	620.624	169.034	45.7926	1311.36	1110.43	28.2683	973.612	1115.11	98.275	188.634	709.501	700.43	415.97	491.856	252.225	29.8273	353.019	149.181
Q6YN16	36.8522	14.3288	15.6361	12.8748	14.6249	17.1982	8.84228	12.0289	16.9488	10.872	12.2718	19.6985	8.2338	12.9678	12.7011	16.135	11.1343	14.0048	8.71461	11.8027
Q6ZVX7	56.3593	25.6218	51.4285	77.0737	16.5965	36.2699	23.8828	18.051	13.9709	15.4052	98.3577	127.63	8.90226	64.6068	150.7	23.1031	24.4437	9.38257	38.7455	106.395
Q70UQ0	27.1527	7.3634	23.9616	9.16952	14.7582	19.5494	30.3585	15.7722	14.9672	11.8332	17.002	12.3336	10.5152	12.5001	6.4375	11.9324	5.29508	6.45585	10.2726	14.105
Q71RC2	14.4396	11.9608	8.57284	9.29856	9.79785	16.6534	22.9007	17.1877	9.76591	7.29194	18.5225	17.1489	14.4251	14.4436	12.3052	16.6748	19.2655	20.3407	17.617	16.1962
Q71UM5	38.9817	24.1243	45.8237	22.5455	15.0959	26.4081	109.835	53.5951	47.2125	33.7635	27.6917	18.7424	25.7204	32.0945	21.8178	31.8811	28.4638	30.0697	27.4556	24.6491
Q7KZ85	24.4688	21.653	13.3396	14.7427	13.802	20.4485	24.9409	18.4854	22.5693	19.3407	14.9384	14.2429	12.2863	14.4935	14.5328	11.6008	18.6992	15.4297	15.9847	13.781
Q7KZF4	124.471	124.426	148.234	142.741	161.746	119.925	138.198	143.397	180.796	131.978	92.4778	115.844	122.934	121.116	113.757	139.311	118.981	154.205	141.538	112.353
Q7L014	43.7573	35.4265	41.3244	40.3727	32.5548	55.6657	37.9844	47.9806	46.1606	50.0087	46.4462	42.6178	43.5178	40.2821	39.9926	46.6457	44.7612	57.671	46.4239	51.3691
Q7L0Y3	25.9028	24.8495	17.3679	19.577	14.7265	24.5401	17.8469	17.2963	20.4716	17.4867	25.1026	24.2434	15.1577	17.5925	23.4219	20.3486	16.821	14.9201	20.0693	22.2789
Q7L1Q6	62.3038	115.037	45.0517	73.1595	76.2771	73.5914	72.1918	73.8765	70.4227	78.9709	79.404	83.0451	82.6156	83.9737	87.2554	98.7597	66.7855	90.5938	65.9641	75.2576
Q7L2E3	35.5481	35.4197	18.8545	29.8077	27.0764	28.0278	17.8088	21.1243	10.762	25.8243	33.6358	24.3932	25.8369	23.046	25.4316	26.0157	24.9894	31.0901	32.0487	31.4615
Q7L2H7	24.9104	21.925	20.2904	29.8402	26.8123	39.9734	28.9279	31.3242	32.2229	20.6189	23.8703	22.0739	18.3921	25.5787	28.8701	26.2607	24.7138	27.8712	29.9459	25.9213
Q7L576	23.3509	22.1086	24.9908	23.7209	18.93	13.7869	13.9206	14.4206	19.3216	19.0375	16.484	13.1833	13.1964	11.214	18.6558	13.9647	10.1687	12.5284	17.07	10.3967
Q7L5D6	99.7224	39.1139	13.7518	14.3968	14.9782	7.8551	24.9785	18.5401	15.5882	25.8282	17.5257	13.0311	16.9385	15.5857	16.9878	14.9306	10.484	10.7289	3.30216	9.51007
Q7L5N1	26.1514	24.4614	21.0629	27.2796	27.79	26.8446	25.3781	25.9792	28.8309	24.8917	17.1593	16.103	15.2071	18.1873	14.6907	15.2664	14.1693	16.4186	16.2509	16.3022
Q7L9L4;Q9H8S9	26.8348	29.6194	21.2954	28.0647	15.1677	15.0203	13.5985	11.8146	17.9517	16.0423	14.7952	13.3578	17.5267	12.5267	22.4037	17.7055	10.379	18.3493	17.593	13.135
Q7LBR1	47.9302	38.366	33.8701	39.6317	33.1193	20.0524	28.3905	24.3755	29.3283	18.9182	24.4395	10.9386	9.57916	8.49626	10.1272	14.521	8.95998	9.80049	14.2171	10.5727
Q7RTV0	90.6417	70.9427	61.123	50.1368	41.7239	38.7777	13.0303	48.9844	22.2494	35.09	45.7172	41.3124	22.9683	25.8998	21.6753	25.0739	19.1591	33.6356	45.335	38.2599
Q7Z2W4	18.0022	14.6381	18.1771	22.1496	25.0757	14.4877	12.1697	19.0503	16.0657	13.2755	20.1606	16.767	14.5141	17.0551	17.2586	16.5261	18.0431	18.4339	21.5397	17.2548
Q7Z2W9	11.5458	28.8585	10.3578	14.617	27.4529	32.3605	14.4816	15.6153	18.4921	14.8843	25.0475	17.9612	26.2741	11.6639	15.3441	20.4427	25.1732	16.7271	26.3238	19.7618
Q7Z3B4	11.4685	8.86596	6.59273	7.49009	5.62567	12.0227	10.8876	8.71793	7.257	8.84245	8.18354	8.09462	6.35516	6.66593	7.66604	6.5054	4.08734	5.70461	7.79287	5.34706
Q7Z417	18.1477	19.5334	16.1264	11.535	15.3002	15.7919	18.9977	16.282	16.4319	22.3366	21.9586	27.3886	20.9691	20.953	22.9959	15.7418	27.8482	21.5547	21.043	22.275
Q7Z460	10.7724	7.73575	8.81056	11.3548	6.56158	8.47189	11.2457	6.72643	6.56261	5.71894	8.55601	6.65149	4.95791	5.04112	6.43307	4.6689	5.33963	5.7624	4.72024	4.38369
Q7Z4V5	58.5099	35.1021	37.9946	51.2787	29.4844	90.8721	69.6089	57.6832	75.0732	44.8731	51.2717	47.2986	45.6641	49.7571	33.0912	50.1852	35.3442	52.9338	46.8005	51.6325
Q7Z5L9	6.0463	6.38046	3.56047	4.05179	2.16272	4.61965	6.70731	8.06498	3.01593	2.79229	6.26332	8.65855	5.58838	2.90375	4.10896	7.89527	9.1855	8.30932	9.67358	4.39849
Q7Z6Z7	30.8628	29.1793	27.9889	23.1013	18.6797	25.7022	32.7749	21.7154	22.3883	26.914	29.9965	28.1278	30.0327	24.6163	32.2554	29.1937	28.2787	20.2482	26.537	21.205
Q7Z739	22.6199	34.0036	17.6948	12.2749	22.6972	31.4939	37.1969	25.559	21.4509	20.9631	27.1742	19.2053	21.6591	16.0669	21.8703	14.2982	21.8439	20.4282	23.061	23.9611
Q7Z794	6166.94	1983.35	1416.85	4698.43	949.49	11454.8	9585.98	2333.1	1439.24	2056.48	2024.34	4059.91	239.937	826.549	2948.46	208.21	3520.82	357.613	724.228	306.703
Q7Z7H5	18.2472	19.2003	19.4604	12.2841	7.51095	9.65848	4.39698	9.50883	4.23152	4.56432	26.1742	26.8937	24.8917	29.3247	27.8179	34.8248	10.7387	28.2779	18.9986	16.7573
Q86TC9	5.61316	3.04524	10.5165	4.36394	7.676	16.6528	10.8043	21.3013	26.4104	2.22388	51.7081	54.0325	5.99216	16.25	43.3819	15.5139	10.3187	5.60744	8.36061	9.86638
Q86U42	86.7747	58.3849	52.7815	38.1022	40.385	81.8437	38.3602	39.1934	42.0654	47.4897	38.1618	32.9132	49.9478	40.5786	33.3799	40.4175	18.2148	31.0268	38.034	35.6348
Q86UE4	28.8669	25.3331	23.7781	16.4069	15.8213	34.7981	27.9613	26.0479	19.3466	22.0039	25.7622	24.444	22.5919	18.7192	18.6672	25.7952	25.6124	25.1368	23.2163	21.5886
Q86UP2	14.4845	13.8638	11.6065	14.365	11.7211	23.2577	16.8766	16.089	14.2455	10.8127	14.2551	7.02861	15.3004	11.0956	10.4987	14.708	10.8913	7.55771	13.0817	10.3312
Q86V81	62.3666	33.9493	27.0854	38.7999	27.0973	24.0053	32.1735	46.0536	42.6531	38.2989	29.5786	21.3652	20.3725	18.1535	20.2628	27.4407	20.2013	21.2661	21.4651	22.9706
Q86VP6	42.6392	54.8527	49.0599	47.1895	32.1148	42.5815	53.3087	35.478	49.1629	34.9625	50.9333	55.0146	50.6777	40.7361	42.43	46.5022	35.8404	47.6398	36.7868	54.6568
Q86W42	18.1818	13.9514	17.6454	10.1482	7.44838	17.9373	15.5588	21.7044	14.3804	14.0765	12.6606	8.8379	11.8543	10.9642	11.6959	5.12446	13.2357	12.9083	12.4947	7.96064
Q86X55	26.8847	19.3985	30.4498	17.6748	24.7282	28.4278	19.443	14.2949	22.9618	17.3798	25.1802	21.732	20.0629	15.393	21.0221	22.4795	19.591	22.1966	18.7054	21.4442
Q86XP3	43.0625	42.1711	29.616	26.2554	27.059	36.1207	29.0876	36.6296	21.5938	25.2928	34.1426	31.1557	31.2997	24.8818	25.1383	26.4496	23.6631	25.37	26.1508	27.7132
Q86Y46	558.47	230.525	369.089	527.581	198.138	130.689	154.148	10.4397	51.8197	69.0182	187.367	273.708	54.3611	92.192	113.009	257.951	58.7994	151.905	22.8939	22.9985
Q86Y56	12.2041	11.6491	7.95314	6.86951	6.53432	10.7298	13.722	6.87266	27.1229	16.3747	16.3415	9.54872	10.7013	9.21065	13.0426	11.3158	14.101	11.8769	9.06844	10.656
Q86Y82	7.32281	6.39047	10.7411	8.8575	7.20266	10.3974	10.0502	4.639	4.36517	4.95101	23.1367	7.40532	6.3319	5.80951	5.70417	5.16736	3.48145	4.81523	2.91529	2.77065
Q86YP4	10.2209	13.8644	4.80186	7.66331	8.68719	12.1471	9.83002	10.2762	9.77397	8.08691	5.65246	8.13378	7.4861	7.1655	4.96879	6.48057	4.23971	7.56666	7.26171	8.73643
Q86YZ3	692.322	299.117	445.73	469.918	235.01	121.948	97.4654	77.2266	99.5385	106.745	1031.75	472.967	79.9007	678.962	1479.42	75.9902	188.079	95.439	46.0504	41.573
Q8IVF2	153.785	128.979	204.86	211.766	227.432	167.316	215.32	189.678	205.25	136.932	106.042	102.763	132.229	103.516	75.5578	124.217	114.277	82.5165	61.0753	63.2017
Q8IW75	182.68	72.0218	88.3599	84.5596	25.2269	31.6487	29.6045	16.5532	28.2044	20.1544	152.815	344.384	47.9019	65.0378	81.6899	43.8821	149.07	95.2984	29.344	29.208
Q8IWA0	13.5226	11.9868	4.09675	4.21096	9.49722	28.5653	20.2378	25.7987	14.4771	14.2191	18.8494	16.3276	16.4301	14.9543	10.5231	8.957	11.2938	16.5296	14.4101	15.5482
Q8IX12	34.4377	34.1316	36.595	26.4944	22.9019	31.7708	33.2636	22.2689	30.8757	31.8556	29.145	29.8079	32.2374	31.3447	23.3099	35.7319	27.0382	25.4192	29.2358	28.2744
Q8IY67	23.1799	17.8143	11.7037	18.3434	10.9962	18.7888	5.5107	7.70856	8.15679	9.63332	9.44743	12.5937	12.6352	8.62209	6.00855	16.3997	15.3455	8.33781	11.156	6.49017
Q8IY81	28.9547	22.4494	19.3016	18.1506	10.2903	28.3777	18.254	19.0377	18.1819	11.7407	24.7281	22.7179	24.3775	13.3911	14.3964	19.5101	14.2695	27.3757	24.6317	20.837
Q8IYB3	22.4539	20.0338	14.2123	15.6662	8.65573	13.7804	11.7107	11.547	7.0958	15.1149	17.0189	12.4979	17.5217	11.7253	10.1762	12.5968	11.9815	12.5381	14.5103	12.8858
Q8IZL8	9.22298	7.13296	7.91521	5.6596	5.10251	13.0704	12.1874	12.0655	13.7632	17.8793	16.3433	11.8325	5.58798	8.42116	6.34393	8.09144	5.80829	6.11196	5.6774	6.28467
Q8IZP0	22.5443	22.0881	21.1682	17.5304	13.0264	12.7764	20.2076	8.87113	18.013	15.2264	16.9979	11.4902	8.9046	8.25312	8.89235	11.8337	10.4969	8.92813	8.13363	7.88945
Q8N163	51.2278	48.4838	22.2593	28.4399	19.8668	41.0707	34.2272	35.6737	26.9977	30.4299	29.2312	29.4251	31.2374	21.4851	27.5953	28.7019	26.5063	30.8921	27.4045	27.2073
Q8N183	29.8985	14.0183	24.2474	23.7938	26.1824	30.2129	29.3142	32.1248	22.3687	18.7316	21.3216	24.1621	19.1859	13.8459	19.9285	24.0018	22.1322	15.6139	17.4181	15.1917
Q8N1F7	54.2706	59.9741	58.941	61.2129	43.1568	47.7236	53.8681	55.9657	55.3325	49.433	53.4017	45.7801	48.428	47.4356	40.0467	54.3203	32.5845	58.8281	51.9395	46.1387
Q8N1G4	22.957	18.2768	17.2625	23.125	15.3988	11.9506	17.298	18.7557	11.8199	10.4699	9.18033	8.30604	12.096	9.00614	14.1917	11.191	13.0571	9.5012	13.7731	14.7625
Q8N1N4	811.653	190.896	162.243	1865.15	84.2072	516.741	633.002	239.516	272.701	342.958	3054.69	3157.91	83.6677	1376.66	2867.14	112.949	262.893	58.9111	105.067	88.6951
Q8N3C0	15.545	11.1066	13.9697	9.16523	7.96527	9.95747	7.47151	5.46795	9.15129	8.41498	7.16106	9.92738	6.84539	4.11554	7.39391	7.53178	7.88511	5.41489	5.59048	5.66073
Q8N5M9	21.6847	10.5478	9.48026	21.0345	41.1836	26.9819	11.814	5.74954	9.05546	10.7792	28.7974	12.2921	20.8029	30.3275	29.9509	28.4386	18.5099	26.1314	24.0807	27.6617
Q8N684	41.891	25.9665	17.8624	17.669	15.261	24.453	17.2741	25.9456	20.8491	22.5183	23.2263	27.0125	19.6631	24.981	15.8618	15.6822	11.7653	13.6636	23.6218	28.6016
Q8N6M0	7.88331	9.32695	5.37923	9.55244	9.33573	12.4352	12.1118	10.0465	8.35572	11.0215	33.7383	3.69976	7.2533	10.4625	7.4709	14.3427	9.54972	10.4707	8.68857	8.39241
Q8N6T3	11.9796	12.381	6.85381	14.651	16.4125	16.5411	21.5244	5.03636	15.3979	23.9924	13.2295	12.9788	12.1969	12.198	16.3794	22.1784	12.9128	22.0479	15.249	14.0901
Q8N726	17.5036	4.31177	19.4055	114.372	70.3693	118.862	89.9437	63.5644	144.437	40.4554	15.8617	8.41349	12.6731	17.0393	9.98564	14.6534	5.41311	21.8055	14.9219	14.3245
Q8N766	36.2367	14.2882	26.606	19.8113	30.5259	40.6097	19.4398	35.4939	20.2699	27.6208	42.9971	36.1071	25.4294	34.1444	25.5361	45.463	23.9021	27.6265	31.5473	35.2039
Q8N7H5	12.4836	15.1283	8.541	13.8153	11.5574	12.5996	17.3918	14.7833	23.608	9.21213	10.5575	11.6551	10.8536	9.71401	10.3251	13.0538	11.0641	9.50146	12.0836	11.7358
Q8N983	28.9478	32.2739	15.5765	18.1338	25.4496	35.9855	18.8729	16.1707	16.6161	18.0862	27.9369	24.9766	23.157	24.5885	22.9568	29.1431	20.9417	26.6067	23.9867	25.6039
Q8NBJ5	55.5295	39.109	40.4678	22.9418	41.3559	63.2376	40.3057	39.497	48.1689	30.181	24.0955	22.7541	18.1664	29.2876	18.6606	24.3067	20.1955	21.7503	20.344	21.5048
Q8NBJ7	14.7458	17.0468	29.5348	17.8784	9.68083	13.2056	10.2767	12.5389	6.44139	12.3483	20.7031	9.497	11.4884	14.1815	9.92056	11.1909	13.5757	9.42696	12.022	8.26936
Q8NBS9	57.1011	40.1755	75.2365	55.6608	50.8737	55.0996	51.7417	37.394	33.9561	45.0382	43.4171	33.412	33.7841	39.9773	35.74	35.4503	21.7768	37.1166	42.6172	29.8978
Q8NBU5	7.50669	12.3246	10.2017	6.00466	4.94644	14.3667	3.47012	26.9511	5.33189	7.39246	26.5841	7.31003	12.4051	17.7598	12.2586	13.3292	18.5915	26.8478	19.398	17.1942
Q8NC51	84.6927	79.3565	111.462	100.178	93.874	76.275	85.4188	86.259	95.0176	101.468	73.1114	69.8765	102.376	115.847	106.222	105.343	97.7339	94.7894	105.266	109.101
Q8NCW5	8.44478	5.5182	7.91492	6.63114	8.06018	18.234	15.8221	6.90382	3.74183	5.97281	10.4133	11.545	10.7738	12.3701	8.04016	10.0883	16.526	10.7588	10.0417	11.9444
Q8NE71	26.6889	31.023	24.0301	17.3521	22.4715	29.3284	28.7708	27.9207	29.697	29.1646	24.0763	23.8502	30.922	38.418	38.2784	39.3267	32.9422	43.0005	38.5142	42.4775
Q8NEM2	9.54441	39.3637	22.8657	22.5076	23.0166	11.2353	22.422	20.3229	15.2002	21.9804	17.029	26.2579	15.0428	12.5693	17.2046	16.2648	12.1253	21.0047	17.2983	17.541
Q8NEW0	47.5815	16.4352	14.7382	15.624	35.1399	25.9585	8.95721	28.7582	18.6655	12.9746	33.1016	19.8021	22.9453	22.8973	18.7261	28.0044	22.6242	17.4751	23.5404	18.1801
Q8NEZ5	18.2341	32.9051	27.7361	10.3482	20.7012	19.8193	20.9889	18.6339	20.4815	16	30.8057	30.8683	28.0392	20.5599	23.2818	19.259	25.2171	19.0835	24.1128	19.0953
Q8NF37	5.5362	6.96406	10.5798	2.67723	13.8601	24.3859	16.9517	23.5038	15.3416	13.4479	9.91581	4.82488	11.2797	11.5416	8.24195	8.81931	12.4502	6.68408	12.0656	5.68671
Q8NFH3	13.4373	19.3168	16.8567	12.3949	10.7123	13.2325	18.3982	16.0329	14.3266	10.6712	11.2135	15.4965	8.13791	8.44187	9.87691	20.8155	11.9539	14.3009	11.4496	11.0685
Q8NFH4	6.68429	22.8615	13.5635	13.5232	14.7446	17.8218	19.0649	15.6905	21.7957	17.6437	18.0278	21.8886	17.2636	17.6218	20.8528	19.3814	20.3322	19.3381	18.759	18.0558
Q8NFJ5	14.0984	22.6394	11.3019	7.83038	33.6095	108.732	27.6202	93.4129	49.0132	34.8213	49.7576	44.669	47.2767	36.2036	23.8275	41.8819	44.2678	39.681	71.9205	56.6467
Q8NI36	24.0355	20.069	18.7385	11.7659	15.9363	15.5411	20.5053	20.4533	22.1354	17.847	17.4214	15.3791	13.0429	13.0104	13.4742	14.7131	15.3857	19.299	19.1954	18.7333
Q8TAT6	19.3445	15.6145	21.5265	12.4557	13.1558	16.3609	23.2599	14.3476	8.99998	10.19	8.14103	8.13344	7.66492	12.0292	8.45549	13.1569	5.12376	7.29422	11.3397	7.96755
Q8TB61	12.4962	22.434	23.5572	19.4163	37.4015	10.6525	11.2872	17.2164	24.7472	9.92391	16.0226	7.33339	10.2874	15.5274	10.3466	16.9654	2.34752	7.32869	14.8196	9.39439
Q8TC12	9.78458	12.2056	16.101	13.824	24.3412	22.9537	21.024	14.0162	13.5465	21.8067	13.2006	10.4939	9.67959	9.7793	7.03388	12.1247	8.02216	8.48734	12.9456	12.212
Q8TCS8	31.7982	26.0742	23.6495	20.143	24.2372	38.7788	26.142	23.2821	31.0734	28.817	37.5132	35.7443	40.8309	43.2905	38.3279	23.4661	35.2111	51.8117	36.2458	43.9912
Q8TCT9	29.375	19.5284	24.268	26.4606	38.8956	30.8762	28.3808	44.5241	31.6365	46.8674	30.9331	17.3753	15.5051	28.6082	23.4061	34.6821	18.5104	36.2474	30.3361	32.8675
Q8TDD1	3.34681	8.21613	9.09371	4.15478	4.40629	19.3549	18.1445	17.5915	15.2506	5.59838	14.9403	16.5443	12.7641	8.87173	11.3135	8.89361	13.5521	14.1634	17.1141	6.86252
Q8TDN6	29.4104	29.2136	38.0324	34.4653	32.081	73.2604	29.2272	40.7572	26.454	12.4695	50.1812	21.1316	35.2652	23.0633	31.4835	37.1166	45.5705	50.9219	45.2112	30.0785
Q8TDX7	17.406	29.9608	17.1658	12.2168	31.2022	9.25553	8.82086	16.9247	13.5434	12.9563	10.5195	10.0088	5.86926	5.72784	6.12119	6.37185	13.9703	4.74382	7.4571	4.07289
Q8TEM1	42.3811	15.483	10.7124	27.9487	11.9161	14.8903	23.3917	20.1584	16.1921	12.7016	29.58	18.8058	37.8713	34.2206	29.3949	36.8675	39.1708	25.1089	30.213	27.7315
Q8TEQ6	17.26	23.4785	21.6838	24.2869	26.8085	26.9861	21.3594	26.6216	33.5571	25.4799	26.8759	21.8065	29.3417	24.0817	27.2844	27.0536	25.9474	33.983	31.587	34.8443
Q8TEX9	33.6501	38.4034	29.7645	19.0987	26.4641	40.4452	56.889	31.3446	59.8937	48.1586	39.1777	53.9771	38.7036	35.2443	28.5044	63.7181	32.6585	45.4425	39.2236	49.0773
Q8WTS6	11.0045	9.73807	9.80038	25.0413	7.05258	4.24867	5.17979	21.9848	7.25133	4.93679	10.9197	13.3592	9.00985	6.47304	4.93482	8.82589	13.729	4.94881	7.01175	7.63079
Q8WTV0	33.4046	19.7825	20.8719	21.9155	41.7254	24.7671	25.596	22.5494	34.5443	12.431	23.9051	10.3915	21.0489	12.8852	18.5812	20.5213	16.7108	20.0467	18.5522	21.37
Q8WU90	17.9635	27.161	34.0426	11.7222	23.1285	20.6243	26.5518	22.3791	28.7088	32.5659	13.4729	8.9374	14.0649	9.76749	14.6759	9.20477	13.1398	16.2757	13.1636	15.8603
Q8WUM0	17.2558	21.0271	18.4667	23.0485	16.3458	23.6518	20.721	18.8994	15.3191	19.166	14.5159	12.0805	14.1282	14.4999	16.5638	13.969	10.5688	12.81	16.2746	13.6242
Q8WUM4	78.0176	76.3753	101.05	86.4613	85.6998	54.2616	68.1666	69.6544	50.8355	100.682	42.9211	49.1322	45.773	40.3061	46.2028	45.6161	45.8391	39.9722	44.2021	44.4758
Q8WVC0	19.956	9.36333	12.4704	36.314	12.0625	6.11333	15.269	6.71124	9.9835	12.3303	15.3638	18.3681	13.434	13.2707	15.2715	15.5914	12.4676	9.19257	12.692	10.3629
Q8WVJ2	23.8977	40.4803	34.7926	26.9976	21.886	34.2549	24.2562	29.9064	33.9007	30.2245	35.1716	40.8602	32.8188	26.3928	46.6339	28.3248	45.9178	27.8163	32.3594	28.3933
Q8WVV4	91.2238	24.5573	33.5766	150.918	17.0955	27.3242	34.99	19.3943	15.9405	21.583	224.131	252.198	10.906	48.1069	147.532	5.30489	14.0917	3.78842	6.50068	3.99509
Q8WVY7	22.6668	23.4795	27.7979	20.6421	18.2651	26.9943	22.4176	20.1673	26.4384	21.1255	22.4113	21.1356	10.6698	13.8558	20.3137	14.6136	16.4032	12.2121	11.9603	11.5948
Q8WW12	61.5844	51.9327	58.335	57.9932	38.4118	44.1594	43.029	36.575	40.3972	32.268	43.8952	18.473	36.9091	37.1648	32.7581	39.9583	52.4803	42.6283	38.0671	41.8404
Q8WW59	25.5588	16.6791	12.6027	13.2358	14.4731	18.0406	22.2352	8.22984	13.1429	7.92837	15.9391	18.3942	9.77143	8.34602	10.4517	9.72995	8.01749	8.35899	7.95126	11.1995
Q8WWI1	21.2908	12.6783	13.9781	11.8299	7.01337	12.871	13.3733	16.113	12.2974	10.9271	16.4378	16.9092	11.0458	17.1095	11.9925	16.6626	12.6785	11.4247	15.6633	13.1888
Q8WWM7	19.902	21.6603	17.4056	18.5183	15.1611	16.9921	16.4498	18.2764	18.6219	16.0254	26.7845	17.3076	17.7695	17.5074	20.3496	19.7143	19.5056	28.7825	21.7907	19.9593
Q8WWY3	9.33369	9.55971	3.76638	8.39215	8.59172	18.1248	11.997	10.8056	7.10453	6.58624	12.2063	7.69848	10.2764	8.57336	12.0984	12.5255	6.55374	10.1255	10.6567	11.0804
Q8WX93	23.8404	16.2943	23.0392	28.6824	33.3331	36.0374	31.7497	72.3714	36.1937	22.8099	39.2832	21.5415	30.2303	29.8792	29.2253	29.2512	25.8796	32.4732	29.7589	29.1964
Q8WXA9	22.4692	18.2224	16.3834	16.1114	17.1596	23.33	11.8798	27.6264	19.7593	18.7582	25.1477	15.6561	10.8326	18.0362	10.4664	9.29515	7.73866	13.7456	15.3749	11.095
Q8WXF1	40.417	21.1806	11.3612	17.8192	13.1011	25.9247	12.8711	9.39364	10.3295	6.14137	21.3345	15.0571	13.1687	14.5707	18.7059	12.1177	10.6871	12.2302	14.5548	15.1893
Q8WXX5	27.3053	15.9776	10.8663	15.0239	10.2202	22.4764	13.1596	13.9664	21.396	20.199	21.4919	15.1902	22.0842	21.0121	19.1715	22.6597	21.8426	25.869	17.9974	21.6417
Q8WYP5	13.0263	17.7075	7.31879	11.9717	8.02605	9.85302	9.33916	10.3968	7.95379	6.74857	9.52149	8.74312	10.5556	9.65114	7.48518	8.22761	7.55159	7.76217	10.4593	8.10691
Q8WZA0	20.4466	18.408	30.0696	22.7589	25.7166	11.16	16.0221	17.4867	19.8434	19.5725	9.67376	8.78462	15.3335	13.122	8.05035	19.9555	8.785	7.06653	8.63822	7.02131
Q92466	37.8535	26.7883	31.3282	47.536	41.1953	16.8454	26.4987	20.6141	33.9937	17.2253	17.2091	17.6255	10.8758	12.0431	10.9533	10.6995	9.99997	7.94744	8.31324	8.49556
Q92499	71.9463	58.886	45.4562	41.4234	57.8307	76.1554	75.4238	63.2903	58.0401	49.2737	47.6215	46.0145	43.5055	45.4931	42.5278	56.0852	46.97	48.5149	51.7028	56.4548
Q92504	8.66674	18.0124	5.27752	9.81408	8.55664	23.2677	14.8527	5.70895	11.3645	13.5736	5.21026	7.35479	5.49969	5.19063	5.1385	10.9501	3.72854	4.38804	4.18971	8.15265
Q92520	9.49488	20.2701	12.7572	12.6773	10.5051	10.8752	9.13657	4.17711	13.8485	18.516	8.40952	8.49959	8.0267	8.84692	8.15658	9.46686	14.0824	6.22129	9.93693	3.81945
Q92522	31.8324	8.38672	23.735	33.0489	9.72996	27.516	18.7819	19.4382	15.7435	4.83537	17.6743	19.469	30.0101	18.8785	17.8892	15.6698	24.5599	19.8743	25.4428	20.9881
Q92538	12.0244	14.3552	15.4008	17.3978	13.3375	22.2091	21.3047	11.9838	26.8011	11.7278	12.2529	10.4387	15.3087	8.7792	10.8509	11.4498	10.3774	11.946	13.0605	7.35302
Q92598	68.6499	82.5416	120.973	100.549	67.6734	104.109	105.075	106.997	110.158	118.85	114.234	160.764	104.438	112.28	133.142	123.138	124.019	135.694	120.349	137.108
Q92616	58.3503	42.6087	36.3947	42.6746	35.9185	38.1582	50.5406	32.9312	48.674	39.2231	51.289	34.4636	50.5481	42.5693	52.8474	55.2481	41.2604	59.228	48.6864	51.7145
Q92620	18.5885	9.46027	12.652	12.7653	12.1458	12.0331	11.4471	5.94477	16.88	8.96685	12.1848	7.87651	11.0999	10.9131	7.71798	8.88804	11.7572	10.8392	8.45324	9.13749
Q92621	18.6656	17.4535	19.5027	18.1126	14.7583	21.5668	16.9262	19.914	23.3499	19.6721	18.5311	15.7699	13.7941	15.9677	12.9364	19.287	13.1166	14.9959	17.2173	12.0439
Q92643	21.3683	19.4913	13.9777	6.24998	9.45008	15.8244	16.6077	12.9845	8.21293	11.2526	8.21339	3.83615	5.98388	10.7385	7.22762	8.63886	6.242	10.7744	8.41273	6.47097
Q92688	79.7391	47.9721	64.5497	43.1616	43.2833	126.306	110.879	84.6899	90.7459	101.458	63.8374	100.623	67.1251	68.3326	54.1428	109.129	90.8619	67.1685	63.2281	86.2206
Q92734	35.3652	38.062	65.5993	37.8481	36.8981	43.3423	46.6761	54.5214	38.506	27.7269	18.783	29.2117	38.5388	35.8966	26.0138	39.7947	37.581	42.9823	38.3224	40.5186
Q92747	39.1763	38.8608	46.5553	27.308	40.0422	49.5882	25.3189	31.2634	22.7203	36.0059	19.1577	23.4868	24.7663	20.7393	22.5251	21.4334	21.2654	10.868	15.1425	13.5113
Q92769	73.6671	73.7312	62.6453	67.5554	61.3033	79.0106	73.8594	68.3007	73.8445	72.6632	72.3411	54.9943	86.8907	72.3011	62.0796	54.5305	39.3539	55.4016	61.6	68.9104
Q92804	25.1309	16.1638	19.6164	9.46951	10.2167	28.7871	27.1748	14.1583	20.9582	42.3595	17.6116	25.0021	24.1272	34.9751	17.648	17.2448	20.91	20.788	11.3362	11.4789
Q92820	168.957	80.8223	99.0872	82.2093	30.3368	28.3995	30.1012	19.5374	24.5599	20.9622	117.139	325.685	30.192	87.2315	93.0321	28.1945	115.002	62.3313	34.5231	30.7468
Q92841	50.9927	44.3344	45.678	47.1323	55.7944	62.3286	33.6007	58.4014	57.6557	48.8981	33.1535	23.6974	33.8266	40.9875	29.6953	38.3993	34.8914	50.871	31.6003	41.5084
Q92878	16.2042	24.0613	17.6816	28.3218	15.7811	20.9306	28.397	19.5817	21.4773	29.5872	15.9875	14.0376	22.3867	14.5653	13.6748	12.8737	25.6505	9.64472	14.8955	16.0025
Q92879	52.193	39.1045	33.6563	41.7801	54.8123	50.4125	41.5451	39.305	40.3106	43.6799	62.2107	40.6177	51.2239	37.6348	46.443	37.9596	28.6314	38.4867	44.6438	37.0197
Q92888	17.8055	8.90294	21.2711	12.0918	6.43853	8.47689	17.3179	12.7937	14.2684	10.644	13.4879	13.0521	8.4405	9.06433	8.00079	14.4926	9.80068	9.32393	9.52847	9.21831
Q92890	28.5823	24.6656	25.6306	20.8982	21.0808	10.8756	21.8924	12.1125	20.8818	21.1113	16.7758	16.7036	13.4941	15.6987	10.173	16.9073	15.2058	20.6284	10.7373	14.2365
Q92900	20.1705	21.8957	19.2128	18.0043	23.816	30.8351	26.7926	29.9119	33.2868	30.2516	23.5336	21.6654	20.7343	22.0121	21.8713	20.7232	24.0598	25.4641	21.2029	20.3366
Q92905	22.9475	22.7947	16.4281	16.891	15.5505	23.7176	31.4297	21.209	22.1805	15.4979	17.5085	15.8099	16.3565	11.3019	12.7604	14.2729	13.2508	12.3779	11.2992	15.012
Q92917	16.143	12.8086	11.9899	15.8545	9.46806	15.4265	6.89929	17.6523	12.1118	19.9037	15.2842	11.7676	14.7191	13.3102	12.8117	13.8178	13.2423	16.0556	17.7673	14.6268
Q92922	19.277	26.9186	18.9073	20.6769	25.9446	30.9131	34.4473	16.7214	22.4036	27.842	25.645	20.2969	32.214	24.7474	21.3996	23.8208	20.5079	27.4662	26.701	25.2618
Q92945	91.611	77.6341	69.9261	83.4766	64.9173	88.7501	79.44	55.4514	77.2962	86.6277	90.7162	74.2057	79.076	76.6588	78.8354	96.1247	55.658	99.8876	76.4262	91.3104
Q92973	40.5096	49.7653	34.3451	49.4459	55.694	33.6255	40.9542	67.3937	36.1628	55.5394	31.5508	34.6323	40.7326	31.8115	27.1091	40.3501	29.9661	25.2976	36.5621	32.6828
Q92979	53.3054	58.0479	24.2796	30.0059	41.9474	75.2567	45.8803	38.8331	38.2183	35.7844	43.632	33.3134	43.004	44.654	42.9625	44.5016	56.6813	58.4643	50.5205	50.3684
Q93008	14.7812	18.9859	17.7439	16.4321	16.4478	11.2233	13.984	18.1742	11.5415	15.6895	13.7242	10.865	12.7019	9.95268	13.2889	15.701	12.5847	8.26772	11.7894	9.09808
Q93009	14.3035	10.9408	11.8844	12.7192	10.5037	19.9599	19.27	12.0276	16.7006	18.5601	17.453	17.3482	14.7054	14.8361	12.4324	10.7119	10.5062	13.4862	12.3385	12.834
Q93050	18.8068	16.5448	6.56185	9.8679	10.8691	15.405	10.6865	20.2522	10.336	8.12039	22.3693	17.7544	8.67462	14.1226	14.4353	14.8796	10.9792	16.6146	12.394	15.3323
Q969G3	23.4801	21.2449	14.1615	22.1066	12.4018	20.7279	12.0048	14.5793	16.1486	9.28725	9.60446	13.3899	10.076	12.1287	17.5112	12.0272	5.99718	8.32696	11.3335	12.5259
Q969G6	6.18198	10.3523	7.66586	6.21176	6.23172	12.0163	6.27898	8.21737	11.3826	8.43536	12.6873	8.53872	4.87706	10.0772	9.78108	6.11884	10.6665	5.96705	8.30317	6.62195
Q969H8	70.011	36.7656	62.6954	40.748	36.3634	50.6489	50.0841	48.2489	60.3409	58.0721	37.4233	43.8875	18.7148	26.2004	36.705	25.4234	26.8187	35.4253	23.0744	31.8232
Q969Q0	45.49	36.9643	39.1405	20.5925	30.4959	24.5154	39.1115	35.4353	34.979	26.8468	43.2335	23.9655	27.8109	34.3699	34.5315	25.2584	23.964	20.4554	21.6297	34.6357
Q969S3	12.5924	15.7571	18.9938	13.0605	14.4388	14.0458	15.9389	12.6299	14.1628	15.904	16.7959	15.3781	16.722	12.6015	15.808	15.6989	12.0898	17.64	12.2789	16.1282
Q969U7	29.2749	34.319	27.0515	29.5525	17.942	29.5026	30.2681	18.3767	25.8456	25.254	14.5499	26.9863	24.8484	25.7771	24.7376	17.938	15.5433	19.9413	17.5511	23.7254
Q969V3	14.9351	8.72129	4.16969	8.81551	9.81789	16.8772	9.63001	13.9967	10.3053	13.8321	13.6692	9.03145	8.90533	14.4475	12.8664	15.9139	9.03089	12.7237	10.6535	12.6277
Q969X5	20.4949	18.7914	28.0091	16.0402	24.2123	41.1573	27.0056	23.2084	23.9166	17.9591	29.0197	18.6922	18.7279	31.0624	20.5121	24.2948	21.7587	16.2918	24.5496	24.0501
Q969X6	22.4911	11.4433	10.8895	31.5927	14.7549	29.7987	10.9938	7.3135	8.55906	10.7958	13.0444	10.0223	9.54325	13.7392	10.9679	14.3434	12.9591	23.3877	11.2514	15.3819
Q969Z0	19.9669	18.0257	14.0104	15.2206	15.0894	26.3888	14.3828	19.7952	13.2225	17.5831	40.875	17.8062	23.9437	24.4532	25.3846	13.6976	23.4908	23.889	31.7061	22.0943
Q96A26	18.889	3.32321	15.9783	15.4262	35.1245	17.6017	7.65787	23.7323	11.0617	11.0012	22.4326	11.0529	20.0175	26.5947	23.154	31.3789	13.4423	22.4833	23.7147	24.0536
Q96A33	14.8025	10.9792	8.61209	9.30551	10.2947	15.3803	8.9317	10.352	9.55216	8.83145	13.8341	10.9588	7.44361	13.293	10.3337	12.3822	7.45522	14.4437	11.0219	13.9163
Q96A49	6.82072	7.83429	21.3082	7.66297	21.2193	16.7491	18.0989	13.5259	16.9606	18.241	18.1032	15.8093	14.3363	13.8381	16.0991	14.9353	14.0603	10.3224	12.6965	12.3644
Q96A72	31.3096	45.7845	47.7766	31.2765	34.742	62.8424	44.6792	33.346	48.0608	53.2333	26.3508	26.4034	35.3991	47.77	32.1134	30.8974	29.8287	35.1264	35.8761	37.92
Q96AC1	30.3405	23.7837	43.3277	31.6975	64.8931	45.5321	32.4858	53.6999	41.6389	39.5414	21.7059	12.968	18.0092	20.1926	18.3919	17.7549	16.4626	8.2767	13.0223	13.9441
Q96AE4	151.967	158.113	117.211	145.547	144.604	185.23	109.322	161.042	130.075	165.45	140.085	130.289	181.064	133.833	135.849	134.345	114.084	102.097	133.216	147.959
Q96AG4	158.207	45.9689	73.8137	51.8217	189.077	195.675	143.395	245.92	130.192	124.271	144.828	89.1584	113.945	157.939	121.194	188.26	69.4448	197.345	172.455	170.235
Q96AY3	62.043	58.4384	71.2746	43.4902	40.3139	78.6126	93.1495	26.8649	95.8823	22.6319	58.908	68.1111	44.0553	58.4141	50.6925	57.8569	67.88	44.1399	52.806	49.4654
Q96B49	36.2727	41.9122	62.9219	58.6238	58.809	126.21	34.8162	50.6623	44.8152	51.358	26.0685	18.6617	24.1532	19.8293	17.0884	26.5647	23.6732	19.7981	19.1005	32.3767
Q96BN8	20.5742	25.9651	27.8128	26.193	20.8203	16.8539	26.4907	22.8444	18.7293	21.9698	15.8895	18.3927	15.5132	11.3169	12.1823	20.4703	18.1942	20.0608	15.6883	16.6729
Q96C19	18.0396	14.342	12.1136	10.3055	11.6895	15.583	1.76914	17.9983	7.25125	14.8064	35.9088	31.7275	26.1534	17.0292	21.3683	29.416	20.8368	19.8501	27.5606	29.0204
Q96CN7	7.38855	13.3204	14.4549	12.8878	13.6882	17.9904	17.3587	28.9503	9.29591	9.03957	16.4071	15.2459	9.94705	12.0534	13.8002	12.7594	8.17628	14.8744	15.5183	13.9028
Q96CP2	11.8607	20.3358	16.9297	14.1041	13.8042	12.0193	14.3727	14.262	10.1426	13.1171	13.6134	16.0309	29.6085	11.8674	15.7165	10.6419	20.8166	19.5399	15.6037	20.6877
Q96CS3	27.4116	23.3655	13.4663	17.112	27.261	26.6931	21.4067	29.4043	15.3319	18.5869	28.5518	17.2647	18.2938	18.3913	19.1143	27.2372	16.2819	19.5589	25.5014	17.3137
Q96CT7	29.584	20.3487	19.7005	16.4524	22.3736	30.9743	31.5913	24.7429	27.3533	33.2167	25.5266	25.8415	20.7883	29.1561	40.6595	25.5201	21.0736	28.7402	21.0773	21.989
Q96CW1	37.4594	24.3784	27.6699	26.7115	24.7983	24.8641	26.1142	25.7552	22.1658	16.5023	23.0012	24.0017	20.9626	21.9262	19.9826	30.0849	18.056	21.5551	25.6061	25.3314
Q96DA0	59.8099	26.8295	16.558	13.4749	7.39388	5.92319	3.39131	7.06417	10.9115	5.33179	108.101	202.308	22.4999	25.7394	59.9707	27.4265	52.2183	13.3636	24.0945	13.1104
Q96DG6	20.8637	74.9557	27.8076	33.9531	12.6791	23.6723	72.8587	41.9039	60.1772	39.5151	64.7298	98.8821	133.946	56.8899	107.988	59.834	122.974	89.2299	82.994	56.2243
Q96DH6	15.6797	15.1631	14.1569	9.89326	14.2634	12.4758	18.6819	17.3412	11.5651	12.2888	11.0051	10.9079	5.93648	7.63987	10.2761	11.555	7.24216	10.5113	6.65408	7.0982
Q96DI7	23.5251	18.5211	22.8061	22.4092	16.8528	34.0966	22.5078	21.407	15.8167	20.778	21.2566	14.9604	19.7043	20.4497	18.9763	16.1497	12.1543	16.3495	17.5391	17.3072
Q96DR8	520.377	202.043	181.18	253.798	102.729	43.9967	50.5374	35.6206	26.0271	45.2812	103.62	604.732	57.8472	27.5448	39.9949	61.6541	170.058	27.3703	73.9415	24.7299
Q96DV4	26.9404	22.4969	13.7581	22.6607	24.4399	35.1645	16.1839	25.1745	19.822	18.4463	30.0072	21.7455	19.0381	22.4299	15.4498	21.7862	7.65618	24.2408	21.2956	22.8915
Q96EE3	11.7816	11.9826	8.61687	5.26885	4.58444	7.87996	13.4101	17.0457	12.788	13.326	5.47432	8.81989	7.51621	12.5201	11.345	10.3787	6.75308	5.26133	11.544	9.35231
Q96EI5	10.9005	12.0679	8.64875	17.2397	8.44133	8.01447	5.69992	3.72411	15.5293	6.42615	8.38092	8.50921	3.43339	4.9764	12.2205	10.3206	9.45127	4.1662	4.81189	6.60213
Q96EP5	21.8926	23.9681	25.6385	22.3188	16.2892	20.3001	21.773	17.0367	20.3956	13.8105	17.0166	16.3772	18.8744	20.1443	17.4853	16.3985	12.4933	20.8711	18.7985	21.3416
Q96EY1	24.1839	20.5124	20.5342	18.0179	25.6267	35.0739	21.0229	19.1863	21.5872	18.9078	21.3946	12.0523	8.92433	19.4148	17.1601	8.13299	12.7957	28.6035	22.6987	22.3587
Q96FQ6	14.535	13.5176	11.1259	19.7633	7.01446	26.7889	13.8158	15.7841	11.4292	13.9106	20.9896	63.4332	10.9874	16.4367	41.7826	13.6635	25.2866	10.4195	15.255	6.16666
Q96FV9	10.1888	7.59181	2.91099	7.70548	3.10036	6.80478	3.87388	6.50663	5.78711	8.95424	7.30821	5.93548	5.92734	4.92411	3.27888	5.49964	3.94094	5.10941	5.19629	4.82724
Q96FW1	36.4094	71.2246	53.0524	39.2699	32.8644	31.7773	59.7549	37.0018	54.9679	49.8849	26.2506	28.3069	21.4764	21.3563	33.5222	37.1538	26.2732	13.5942	25.7681	19.4259
Q96G03	37.1391	31.5036	41.8016	24.5043	25.465	23.3781	25.946	26.082	24.3949	25.4046	45.7864	37.0531	24.6808	20.9842	33.4699	24.2697	64.0438	42.9607	23.8769	20.357
Q96GQ7	25.375	11.522	9.74935	11.9186	7.26472	23.5394	13.4243	18.5524	15.2109	8.62403	23.0677	15.6489	16.0694	13.2892	20.9198	19.1644	12.6983	36.2446	20.9693	11.1779
Q96HC4	16.6315	14.9562	29.7954	15.3042	41.0743	20.9075	15.6049	25.1559	23.3121	17.6395	11.3303	7.09781	7.0314	8.00992	5.71322	2.39205	5.48795	5.3725	5.42102	4.8967
Q96HE7	22.6094	30.289	27.3594	22.5824	20.042	27.6081	42.4784	27.818	22.0149	23.7348	21.0549	19.5301	13.2726	19.5826	22.0938	19.3097	13.0003	7.82052	15.1264	15.4298
Q96HS1	35.0884	53.2036	20.2687	43.5315	29.3795	44.7769	36.2764	30.8583	29.2194	31.4154	62.6132	64.9211	51.6415	56.5506	48.78	47.1217	51.2833	60.6586	55.6311	59.658
Q96I24	37.3775	44.8521	39.4035	35.9828	47.2023	25.0296	23.8474	43.5833	31.3521	34.3491	37.6235	29.5515	19.4759	24.9044	28.8423	31.6196	22.7182	36.724	32.7982	33.8143
Q96I25	36.5007	30.9746	21.6869	15.6349	16.718	34.4009	22.2005	22.0685	22.4332	31.2229	13.9952	20.0186	25.2198	15.8409	19.3217	19.3097	26.8112	21.2641	20.9887	20.8834
Q96I99	20.7218	27.5728	29.527	20.978	15.7749	15.5472	13.149	13.8026	13.1142	13.7753	19.7087	17.1366	27.2948	14.4352	18.1653	11.2864	13.4357	13.5317	15.7219	16.4639
Q96IJ6	22.8654	27.3678	28.5287	19.589	25.13	19.5945	23.8703	13.0639	14.4632	13.7152	26.0576	33.2086	24.1331	20.1857	23.9888	32.0264	25.9594	20.5941	25.3107	22.713
Q96IR7	23.1278	10.6908	7.28575	6.14992	7.44438	15.182	6.28694	9.28867	5.99484	12.6514	18.1437	12.5295	20.5607	13.8196	11.6552	9.58562	12.9087	11.256	16.185	16.0483
Q96IX5	64.4854	17.1038	10.9072	38.101	40.2199	73.5863	16.5085	47.8093	35.2996	28.0915	62.6665	43.7398	41.8694	53.2218	43.1098	45.9877	28.7155	56.5845	52.2531	59.2388
Q96IZ0	11.9328	11.4514	8.60288	8.32693	8.6557	20.6186	7.0127	13.7757	11.5721	11.8963	8.07246	9.34635	8.31461	9.49195	10.3078	12.9444	11.6652	13.6728	8.05186	9.97954
Q96J01	17.4604	21.7476	14.6533	15.9967	20.2612	19.0104	18.5594	14.7903	16.8726	17.6218	18.5713	15.583	20.8364	15.4382	19.0874	13.2664	15.0182	18.306	15.7606	18.3197
Q96JJ7	10.5297	9.35208	13.1976	12.1772	25.7999	17.162	14.9541	19.7181	15.6129	15.2445	9.39827	6.03031	7.16926	6.12967	4.44311	7.29373	7.47842	5.39487	3.67411	3.4011
Q96K17	87.6269	36.8914	23.4683	40.2656	18.1969	20.4843	17.902	26.356	17.2983	21.19	29.9568	26.2063	19.8765	23.6707	24.5233	18.8955	24.1643	18.7374	19.7165	22.8118
Q96KA5	36.2896	9.46541	14.2686	19.8469	19.0612	51.9953	36.1755	24.9307	38.8208	25.2335	12.722	8.79526	16.9425	17.0311	14.3748	11.1847	12.4229	14.4114	18.0116	13.9517
Q96KB5	28.9001	56.9661	13.1475	24.1484	14.9744	20.6325	41.1571	22.3477	19.4299	20.306	13.8785	15.853	18.6842	15.0628	15.9772	18.0625	19.2553	19.2826	11.5766	17.5094
Q96KP4	21.6697	23.3478	31.491	27.7262	27.5474	27.0407	38.3012	16.4017	41.6457	22.5902	34.0806	19.2981	23.5181	14.4175	23.0583	26.5604	25.6414	19.4307	24.3733	19.6856
Q96KR1	16.9727	12.6333	20.1842	12.6183	13.4957	17.7622	15.8458	15.3894	11.5587	12.3372	14.2894	10.1419	18.0284	12.2506	8.80741	12.9644	9.29842	9.95671	12.9848	12.8298
Q96M27	26.4156	25.2488	32.9507	15.1657	18.5153	16.571	26.3563	20.704	20.1263	12.4051	21.3086	26.6302	18.7964	17.9414	23.149	15.2116	25.3757	17.952	16.3053	12.2781
Q96MU7	2.82341	8.09804	4.60372	7.85122	7.80818	13.3703	7.36398	6.93046	11.1315	4.34496	6.7104	7.36806	10.2101	5.71554	5.03498	8.01554	8.5338	7.00776	8.90716	10.0343
Q96N66	13.5577	7.89399	12.3128	15.5268	14.2601	9.98079	5.87807	6.8977	6.18879	6.90032	15.5667	5.87996	8.13525	13.7435	10.9684	12.7815	4.41351	7.76076	12.5445	12.2703
Q96N96	103.554	3.95723	55.2762	58.585	27.4446	162.856	176.678	127.296	123.098	105.741	152.437	236.829	131.822	114.232	176.894	163.59	214.431	90.8673	57.969	65.1475
Q96P63	272.507	70.0862	120.76	278.103	30.1213	86.3217	140.595	38.1432	45.6522	54.5383	383.986	432.79	22.1409	142.402	269.841	23.4963	75.9748	27.4294	24.8138	15.4503
Q96P70	37.3654	34.2712	33.7416	40.2943	38.2506	19.3165	27.0449	19.984	20.0478	21.3334	26.6345	38.9691	38.3294	25.722	40.5776	23.284	34.2759	26.4733	34.062	31.6885
Q96PK6	73.9987	68.3055	40.8261	51.0913	51.146	55.8013	37.0204	45.5979	47.5074	40.8109	73.8334	59.6855	60.6955	61.5304	41.7117	55.4388	31.4675	51.9909	66.537	64.0032
Q96PU8	83.2789	49.6157	52.3746	62.8405	22.4149	75.9202	55.3667	34.1839	40.1484	67.8191	33.6611	26.1304	33.7508	22.0855	34.2464	32.3174	28.2529	34.6949	27.2537	20.2145
Q96PZ0	16.9733	11.367	15.0475	15.1538	14.9888	28.1013	12.2044	17.2102	17.5413	19.5235	21.4195	14.1133	10.5591	13.7104	14.0683	10.6111	12.6322	16.2647	12.9826	14.0271
Q96Q11	36.3718	33.0468	23.3467	23.0793	19.7989	21.25	18.0049	17.1885	12.533	15.9031	14.7478	15.7929	15.1897	13.3643	16.1769	15.7823	25.7141	16.6389	15.4984	12.1822
Q96QK1	48.2869	50.8091	51.9841	37.5346	44.4753	44.4082	49.7528	49.0902	41.747	44.2379	63.6693	45.0317	65.949	58.8352	78.1435	57.1338	48.8229	72.6383	56.805	57.2201
Q96RP9	28.3047	19.6158	37.9637	33.1101	34.0482	33.1149	15.8934	22.9815	25.4849	10.0154	39.6915	38.5421	23.7023	27.6655	27.5625	18.1402	18.689	36.2663	33.8784	33.2373
Q96RS6	38.4445	28.3197	21.36	27.019	25.1315	24.3781	26.9403	12.7458	16.6285	23.3139	19.2879	21.088	20.156	45.8391	22.3589	20.7189	24.5044	23.1213	20.2125	20.4612
Q96RW7	287.218	214.473	396.658	31.2262	22.4447	545.977	385.03	8.30222	374.845	415.445	88.9629	100.437	216.914	382.212	48.5067	172.033	56.3219	7.22857	91.2808	34.0924
Q96S44	76.4918	24.8821	10.6161	12.287	34.5781	33.314	26.5852	26.5195	28.9492	40.6292	47.9746	22.6106	15.1956	21.005	18.3724	29.0195	32.1865	8.72902	31.6179	13.8907
Q96SB4	20.9336	13.6535	11.8527	18.9798	19.7945	16.5346	14.1696	15.9907	18.629	20.1413	20.1303	27.7207	12.2051	25.9234	13.2112	16.049	14.1111	15.1264	13.8792	17.4322
Q96ST2	28.8332	19.0547	14.8657	16.1252	18.3831	23.6013	14.5992	10.4425	15.6495	16.3996	24.0156	17.7613	19.3682	16.3725	16.9368	12.9175	15.2974	25.0064	17.1468	20.4789
Q96T37	28.8657	18.0106	6.20237	10.1898	7.45089	14.1866	11.5407	7.72893	5.87797	11.4446	10.8036	12.7965	10.3565	9.63057	10.5077	11.5338	15.769	10.8188	10.5293	9.85423
Q96T88	25.4157	5.17035	6.48349	8.56755	9.99993	15.5055	7.11396	10.6896	13.1764	6.98462	9.28041	7.55158	12.2351	9.46992	8.48372	8.21619	7.15124	10.6587	15.7173	7.29455
Q96TA1	54.8412	55.2229	78.0957	63.5882	88.4139	52.3436	46.2398	71.0357	48.8048	47.4565	31.9484	33.757	30.6416	35.6815	34.3562	31.8772	28.7068	27.8812	31.7412	35.6264
Q96TA2	17.0888	18.1421	27.2716	10.7538	13.9384	16.9138	10.054	18.2458	12.5853	9.94696	13.2855	13.6726	11.8032	10.9874	12.6979	14.384	15.2997	11.1735	13.5138	10.9368
Q99417	25.9476	18.724	25.4734	20.7279	15.4365	20.2292	24.2449	28.1523	24.2735	31.7264	19.9594	21.8788	14.4009	23.3179	21.2467	22.0411	13.036	16.5662	21.291	16.9917
Q99426	25.8872	27.0363	54.8452	40.1689	23.5432	27.721	33.1076	41.6488	41.6804	56.8583	34.3711	34.037	26.2993	25.7996	30.3241	29.4888	26.9926	19.6212	29.9914	28.6192
Q99436	39.2741	29.042	38.1436	46.5391	31.1823	36.4982	38.3045	39.1721	35.8472	36.9518	42.9193	57.4591	27.8787	41.859	43.9682	36.9163	47.6254	31.7116	36.3189	38.5758
Q99439	55.7815	55.5069	93.6342	45.2092	152.029	87.026	21.4035	63.9379	51.9177	53.7254	23.2876	23.7333	25.8299	27.2909	34.989	42.3054	27.5104	33.7013	37.6606	31.231
Q99459	33.2188	41.1173	28.0881	25.9291	25.4812	34.1812	38.0627	28.4296	32.2453	35.1341	39.2549	28.3547	36.1831	31.8742	30.6056	34.527	28.2037	34.5992	38.8101	38.4255
Q99460	26.2102	34.1907	45.396	40.8612	41.9774	31.6213	31.7965	37.2046	31.5901	40.729	33.0621	35.2681	35.0302	35.0849	30.1518	35.08	30.0859	27.109	28.7203	32.7168
Q99471	16.4086	13.415	24.1467	16.5455	20.0791	19.8278	16.239	14.4896	20.3865	23.5105	16.2979	17.7576	13.1835	11.9969	13.7004	24.4753	15.5649	12.5865	17.4572	12.8277
Q99497	114.094	111.3	115.787	119.97	74.3712	70.2471	149.057	118.006	97.7874	108.132	129.213	215.105	134.677	125.641	141.92	143.852	239.7	127.531	102.953	121.339
Q99536	33.957	44.0194	44.2814	36.647	37.0077	22.7413	33.8657	57.5994	35.0201	46.0682	55.8703	56.8081	37.5071	51.0025	44.8001	55.6523	48.5254	38.2655	34.9707	40.3855
Q99567	19.7554	17.6307	12.4122	10.905	14.8435	18.3167	27.404	35.3458	19.6045	13.6836	18.9567	16.882	12.8522	12.878	14.1392	13.6941	18.2821	17.5296	16.2438	13.676
Q99575	13.2932	19.2175	13.2516	10.1712	13.7552	19.837	14.9283	15.3998	12.8091	15.7402	17.4814	19.4316	12.129	10.7552	14.139	15.0827	14.9615	22.4401	13.9852	17.2285
Q99584	20.8	22.0755	21.5116	22.5363	25.9341	36.2282	48.2128	68.5419	29.8412	29.5104	29.5815	51.7763	62.4767	49.9496	44.3293	34.847	62.7013	48.3097	50.0895	50.9045
Q99598	36.559	21.6476	13.119	12.4084	9.31416	13.8491	18.0159	20.428	19.3479	18.2952	21.1621	29.1062	27.3236	32.1751	26.497	25.5905	29.4368	27.3068	27.356	26.7805
Q99614	22.049	25.4031	29.7108	35.0285	42.1339	33.3153	25.2625	35.525	27.7054	24.8354	29.267	29.4808	36.6551	19.3273	29.0824	22.3163	31.3168	27.2061	29.3681	23.9798
Q99615	22.6484	21.1031	32.7904	20.7685	22.7814	15.6091	19.4662	20.5345	27.4774	23.459	21.2117	20.6002	23.1348	27.906	25.4639	25.6487	19.1236	24.5484	23.1555	26.3384
Q99622	13.261	10.8137	7.42588	6.92316	4.28134	3.68855	14.364	6.79594	11.5121	5.88432	12.3258	7.57914	10.7262	9.40438	9.42993	12.7355	7.5952	5.25867	9.12059	2.46229
Q99623	108.596	41.7581	115.455	125.425	139.187	194.687	84.2218	78.7074	121.581	108.892	134.792	143.355	137.931	183.975	127.303	170.816	244.081	162.847	162.095	197.803
Q99627	12.9252	22.0104	18.4175	19.1968	17.2416	21.3992	21.1544	18.1883	20.1869	29.2817	17.6033	17.5394	9.59994	15.0979	12.3293	15.8376	5.78512	13.0468	13.5792	14.276
Q99661	16.4422	18.3466	29.8041	18.8896	20.6528	9.46591	17.811	25.3865	18.8308	18.5414	21.2397	13.5843	22.3349	24.124	12.7615	14.8606	16.3214	11.052	14.4017	14.9502
Q99714	32.3263	44.7462	36.5468	25.3319	42.0953	38.9106	21.8415	41.7719	34.9667	43.3188	67.9999	57.4667	42.1048	48.3614	58.6759	44.4031	40.7253	46.9127	50.8909	48.6826
Q99720	38.0628	11.2345	17.6192	28.3571	17.7932	63.0361	82.3611	16.2321	47.4908	33.4625	29.5593	19.5137	16.6693	31.3003	22.9413	22.0202	23.2377	20.6073	21.6494	30.1454
Q99729	46.6806	63.5435	58.5825	36.1094	58.839	90.829	40.5388	105.004	55.448	63.3062	46.2397	47.2331	66.5619	44.1498	39.2074	49.249	70.0474	55.759	46.9495	60.4674
Q99733	69.424	77.9684	118.721	82.4563	78.6897	43.2663	43.1538	35.4923	62.6248	47.4019	28.3435	28.1653	51.2762	46.1436	42.12	38.8744	44.6392	36.9185	39.0261	30.1868
Q99798	18.6444	25.5336	41.8452	34.1062	36.5803	23.4456	25.9386	21.0866	28.7598	15.7142	25.6023	22.0246	26.329	21.9164	22.185	17.2578	17.8969	19.7398	21.3601	22.9786
Q99805	26.3829	27.7118	27.4185	30.3161	21.6048	27.6296	26.6394	36.9009	15.0722	19.6482	12.6127	8.95632	6.81933	10.3716	7.76099	16.0352	7.43877	8.20949	9.26731	6.76975
Q99816	17.9824	17.8274	11.6461	12.8135	11.1016	11.7557	19.0535	8.30795	15.992	7.16447	8.81708	8.02002	10.7137	8.69715	7.9214	9.3023	10.9453	7.15607	7.94354	8.97991
Q99829	64.4778	79.2783	89.2237	55.3051	55.2187	72.7234	81.1539	38.9698	95.1009	87.4528	58.8168	50.0776	37.5616	35.474	35.639	38.2677	47.0132	48.8225	39.2493	34.7889
Q99832	95.4384	118.466	136.071	125.554	154.887	121.544	148.631	145.317	152.142	152.988	167.878	202.998	177.861	164.203	169.298	176.805	162.497	215.388	156.847	231.695
Q99848	30.938	26.7969	19.6387	23.0752	18.6348	65.7023	23.5362	36.1574	25.0642	12.1421	41.1963	24.1335	42.2019	26.9726	28.8505	37.4291	21.4152	46.0095	43.4502	26.1822
Q99873	27.1745	24.2427	23.084	13.7579	12.8578	17.229	19.6809	19.1492	17.1467	43.1393	27.6875	22.1759	18.4099	16.7617	22.7116	27.0803	14.9654	15.128	19.0397	26.0061
Q99961	55.0324	35.5393	32.3019	36.2078	56.0538	40.605	43.6352	45.8538	43.2375	55.925	34.271	25.3734	22.9086	32.8121	29.9021	43.2442	27.1543	31.9936	25.7047	21.4935
Q9BPW8	17.108	13.6508	20.872	9.66438	10.6765	12.4375	13.7505	12.7945	10.9901	3.65682	14.122	12.1447	13.1423	10.0427	14.2114	6.98818	12.7737	9.75308	10.7129	9.26975
Q9BPX3	20.0094	18.8922	11.8634	16.654	8.90981	16.1457	16.9124	9.64699	7.5713	6.03194	15.9592	17.2223	19.9695	13.0448	17.8511	11.7584	18.1397	15.8746	13.6419	16.6406
Q9BPX5	35.8838	21.6102	30.7291	22.7048	41.6483	15.043	10.327	9.35705	11.2156	14.6263	27.4687	21.8231	13.967	16.4848	23.6522	21.8163	28.7107	18.2809	20.043	19.8603
Q9BQ39	33.3642	27.3623	24.415	25.1174	14.7295	21.8461	12.5572	18.1914	16.8945	19.7357	22.8541	13.1041	20.4237	19.1255	15.516	17.4024	12.524	17.3332	24.8745	22.074
Q9BQ52	19.3361	13.3589	23.92	12.1228	11.3689	12.3196	17.555	12.4176	17.2696	13.6187	24.5586	23.1298	12.3029	13.9496	13.1177	18.7504	17.3134	22.4678	18.1683	21.5657
Q9BQ61	15.3709	10.295	9.84831	17.1498	20.7979	14.8534	10.2427	18.727	13.0442	9.43128	20.8433	18.3751	15.5685	16.3868	18.2709	8.17185	14.2576	19.9086	18.0399	13.6709
Q9BQ67	18.6825	16.7414	21.3861	16.6407	15.5138	37.7148	23.388	21.5874	24.4114	28.5594	16.7955	17.6576	13.081	21.2567	15.6353	20.1895	9.64589	15.34	12.1368	17.6561
Q9BQA1	43.6022	26.1065	21.1511	46.8619	27.7208	38.7119	33.9924	37.5369	27.6379	55.0741	43.9853	50.3558	53.0312	35.2691	39.8712	36.1459	40.5059	34.7344	36.7213	47.8552
Q9BQE3	2.79712	1.23806	22.8578	6.86217	8.21446	26.8339	21.4349	22.114	16.1494	16.2398	4.23375	8.09685	4.29784	7.66009	4.25897	7.38226	3.34323	3.2393	2.70405	3.18401
Q9BQG0	22.9855	16.1022	13.6899	16.7537	15.9462	32.0116	17.3034	25.6258	23.9198	22.1504	28.4427	16.3673	20.7263	16.1218	18.3319	26.0415	21.8478	29.902	31.2608	24.6636
Q9BQL6	29.8604	22.5784	27.7751	33.4131	36.762	14.0847	24.4533	12.7043	9.39351	9.76335	10.9997	14.1024	4.58445	13.1208	9.06896	12.4153	11.2938	10.2159	10.9329	6.40854
Q9BR76	45.8069	23.7211	52.0207	29.8203	41.3523	17.7771	19.2239	12.8448	33.8491	26.7782	24.2551	21.0783	21.0756	23.1928	27.5507	19.4971	21.5799	14.06	28.2215	23.2373
Q9BRA2	72.7905	94.4094	142.268	75.2007	78.9289	47.3095	119.961	83.6776	94.1024	138.57	89.2361	141.174	90.3432	101.182	89.1729	125.532	121.402	80.0951	91.5856	108.534
Q9BRJ2	14.022	13.0462	16.2856	13.2223	15.1445	18.1256	9.63533	10.5102	16.0944	5.0337	16.5693	16.5112	15.3123	13.6758	12.8836	15.2868	12.3157	13.6264	13.5133	13.1186
Q9BRJ6	11.3571	15.8717	11.496	15.5387	6.38379	13.655	13.5404	11.9224	15.3417	14.3225	8.74199	10.6224	13.5399	7.69719	5.75909	12.6204	6.97897	6.98215	11.2156	7.49132
Q9BRK5	21.5362	18.7796	13.087	6.83778	6.19921	13.7528	13.268	11.6166	10.1089	7.20833	15.542	13.3614	14.4207	8.56148	11.9676	8.05208	11.551	6.36956	11.2501	4.26447
Q9BRP4	18.7324	12.4831	7.98023	9.59586	8.83045	9.74292	12.6684	13.7299	11.1006	5.69811	16.8804	12.4822	5.90035	10.9123	12.2777	14.0562	5.7504	8.94234	11.6416	9.32408
Q9BRP8	8.87681	11.055	8.59649	11.9563	8.42407	15.1102	13.2958	7.45222	10.8627	7.43941	8.11704	8.87759	9.5163	13.8984	16.8228	17.6394	9.031	13.2251	10.6974	10.0647
Q9BRQ8	12.5564	10.9118	10.0128	14.9602	17.6296	21.4659	14.0948	12.3324	12.6919	17.2336	18.7959	13.487	10.6971	12.0346	12.299	15.6777	11.1241	11.7021	16.7056	13.7758
Q9BS26	20.7529	38.5288	37.5256	29.3946	21.8531	30.4859	27.4367	40.2198	26.207	17.2537	24.1096	36.2862	14.1182	23.9912	23.3293	23.0631	20.0321	16.3901	15.5656	20.5622
Q9BSD7	28.4776	28.6824	18.3226	15.5294	21.3983	9.93113	13.1385	18.1055	10.2095	13.3965	13.5819	8.34437	26.5922	23.6872	16.9596	11.2738	17.8993	17.5825	16.3457	12.5075
Q9BSJ8	16.4304	13.1843	23.4025	14.6483	14.9908	21.1921	17.7522	23.7896	15.3843	11.75	17.3907	17.3236	19.8013	14.8765	15.7809	19.2373	15.1003	15.8369	11.5879	12.3993
Q9BT78	26.739	24.5045	26.7011	29.865	22.3706	29.2853	24.4714	21.0164	25.3013	20.635	20.5651	15.0211	17.5805	16.6096	14.9815	19.714	16.92	15.8642	17.1726	18.8131
Q9BTC0	6.1885	6.35091	4.99908	1.36747	2.82333	7.01181	8.75723	3.72317	4.29864	6.87867	4.89105	5.0384	6.28745	3.5189	6.86129	7.26719	4.58346	5.19693	3.82505	5.61889
Q9BTE3	23.4407	16.0595	19.3278	14.6362	11.1443	18.0429	8.45499	11.6384	11.3699	14.824	23.713	18.6624	19.0242	15.8459	15.8255	13.8486	22.7389	12.2353	17.2903	18.3127
Q9BTE6	18.3613	17.9991	17.43	14.453	12.1696	13.8147	14.8125	5.684	20.7129	15.4396	10.4442	12.5176	6.53867	9.06006	12.5699	10.2408	11.7291	9.51722	8.6293	9.23143
Q9BTE7	15.7059	10.0926	15.7573	6.71675	13.1094	15.6	13.8559	14.4635	11.9404	21.3285	10.4947	9.75882	6.64203	9.92732	8.56318	8.53549	14.619	6.58082	10.6575	11.1522
Q9BTV4	43.9076	22.8824	22.9977	30.341	47.5025	30.1972	22.0179	18.495	11.5343	36.5251	34.8362	31.0996	18.9837	31.04	26.8627	24.4158	26.0912	22.0532	22.5941	24.1801
Q9BTW9	8.00742	17.4057	17.7529	11.9069	12.4608	4.90036	18.3806	7.06655	10.0187	12.8425	14.2413	13.3617	10.119	11.4887	12.0434	10.4627	11.5034	9.25042	9.02363	10.1413
Q9BUF5	105.409	127.478	253.446	145.771	208.558	82.5641	134.14	128.111	97.6468	115.006	42.9585	55.2985	48.3323	62.4756	51.674	57.452	40.7998	40.5508	44.9419	49.5058
Q9BUJ2	35.9781	33.974	19.1529	16.1977	21.8619	33.2169	31.7076	35.9465	28.5126	25.1482	18.8864	24.5657	26.6495	19.6552	14.9608	11.9939	21.9138	12.9479	16.134	15.212
Q9BUL8	28.7182	31.6984	41.1608	28.0158	31.2572	39.6326	31.0896	44.8132	35.2434	29.0046	43.2323	30.8836	32.3914	39.8688	37.6246	41.4374	29.8823	42.2352	39.0525	42.3018
Q9BUN8	31.628	18.1261	21.5477	8.97203	22.7704	21.0343	22.3802	25.2868	11.3239	25.9971	21.6371	7.94337	11.5831	14.8067	17.0451	21.11	11.1126	23.1919	13.5239	18.872
Q9BUP3	44.0257	31.325	34.8905	47.336	58.7247	54.7248	45.8488	37.294	40.1986	33.5679	78.3495	59.2246	48.2947	74.2333	64.0203	90.688	43.6982	61.7839	54.1099	51.3572
Q9BUQ8	37.097	32.7775	24.6243	26.5653	26.9757	48.3206	37.9548	39.3215	31.7362	33.4164	34.3904	37.7801	36.3214	34.7491	27.1002	26.3294	29.008	39.7018	31.3001	34.3586
Q9BUR5	8.84857	8.35566	9.90361	11.4838	10.0901	17.1335	12.4883	10.3998	14.6008	12.3621	12.0184	7.25374	10.3133	9.33325	7.6249	6.59638	6.0589	5.53523	9.83675	8.3982
Q9BV20	40.4804	15.8752	16.5783	16.5888	15.3995	20.6296	22.7265	16.3395	12.0325	13.2144	32.5504	32.5922	5.67252	16.7003	23.3481	14.5599	24.2025	25.6696	16.2446	23.8754
Q9BV38	28.7666	23.5903	17.9366	20.0405	17.8025	24.2736	19.5007	24.0601	20.985	17.6327	19.1166	10.8641	15.9956	16.2258	7.76402	13.8313	9.65113	10.2308	8.60918	16.5149
Q9BV44	11.9295	17.2436	11.964	13.2116	17.4691	6.27697	9.87913	11.8933	12.2743	13.1476	10.5485	11.6622	8.98151	11.9589	12.3135	13.4407	11.4596	12.5809	13.6861	11.9089
Q9BVC6	37.6406	48.6929	53.1546	44.1625	48.8037	28.86	20.0175	62.6633	20.2303	21.7384	27.3422	27.2923	25.4845	32.5563	18.4922	23.6403	17.3813	31.7907	22.3999	15.5791
Q9BVK6	119.062	73.4494	60.9619	61.7273	76.5387	103.622	76.8153	98.0829	66.801	70.5432	90.0901	64.5187	72.0069	70.9477	81.9333	92.4067	61.5805	70.1861	66.0944	66.831
Q9BVP2	33.0537	31.0667	23.271	16.9587	26.7185	60.6966	27.8324	31.0298	32.0888	21.7638	31.5618	32.5067	43.0043	36.3805	26.3257	43.1702	33.753	46.4977	35.5477	40.4776
Q9BW27	13.8098	27.3435	22.1016	16.7302	19.1414	19.9862	23.0894	22.5231	19.3288	30.5437	13.5862	15.2326	14.1627	16.222	12.0329	14.576	8.77031	14.3465	16.2863	13.9806
Q9BWD1	23.1488	55.4803	46.1824	30.7758	21.5278	38.1237	59.3139	75.0681	54.3658	44.8918	60.4789	55.7266	53.3636	49.1758	53.6812	49.3913	45.7888	63.0168	47.3491	40.8623
Q9BWF3	31.3186	76.4723	28.3886	38.4682	32.9765	47.0047	30.6445	42.8043	33.7749	18.7999	56.9218	48.7641	33.3092	28.8085	35.0022	37.6148	22.9731	36.6541	42.5696	27.3547
Q9BWM7	37.9177	38.6096	18.8769	31.045	17.3399	18.54	27.3667	8.55076	28.5704	17.1636	20.1111	19.3974	23.5294	26.0218	15.6294	23.4363	21.201	20.2987	21.2923	24.3813
Q9BX68	24.3227	28.8992	12.9335	22.3459	9.10506	39.9409	13.4389	12.3392	19.3343	8.07384	8.44668	6.82131	10.5661	8.14887	10.4159	9.28415	6.77092	4.0156	6.77623	7.21619
Q9BXJ9	23.9818	25.0276	23.1283	18.0247	22.2306	24.5902	28.7278	24.5928	26.3621	28.5964	16.7036	19.2731	23.1284	25.1194	24.0324	19.7167	21.9211	23.4978	23.719	24.9815
Q9BXP5	46.5182	34.8904	34.2434	35.052	29.7914	36.3387	25.4857	28.4744	35.1434	35.0173	35.7426	29.8945	33.8107	30.372	25.2349	26.4939	26.1856	26.0256	30.8195	30.7045
Q9BXR0	17.2286	20.4359	21.9047	11.268	9.6245	15.0962	17.8909	5.78207	17.6631	12.6739	15.41	22.5341	15.1583	13.9077	14.7991	9.10726	17.9949	14.247	14.626	19.0447
Q9BXS5	33.157	26.8635	42.1291	27.52	27.0967	24.7829	28.7439	40.2545	27.4332	26.8511	24.4723	28.5223	22.7657	24.4811	26.9121	26.9466	27.4786	25.2632	24.8057	20.3386
Q9BXT2	52.9896	108.993	77.9035	50.0633	84.8067	76.842	87.1223	58.8179	65.7907	31.4313	39.9576	52.835	33.686	45.9566	33.7783	59.1255	44.9211	37.1118	38.4871	39.2488
Q9BY32	18.4868	21.4823	37.104	22.8854	26.2406	20.4059	20.5702	6.84137	10.2656	17.2047	25.9722	12.3864	21.0098	12.2386	18.0718	16.1489	13.9644	11.5672	13.746	9.92071
Q9BY43	11.0546	13.6381	10.4414	8.23695	8.75608	16.9893	20.4191	13.8943	16.0431	15.867	16.5234	19.5266	13.2288	12.9816	14.7424	20.7093	9.00266	13.7385	15.4517	10.6084
Q9BY44	22.7365	24.3614	39.3769	28.3971	46.7854	24.2169	18.7109	24.5936	25.5545	24.885	16.5605	20.1029	18.9204	23.6868	21.8531	22.1613	23.3924	23.1489	23.8783	24.8989
Q9BY77	16.3677	20.0313	10.6281	14.4476	9.64086	10.9209	9.8925	10.8734	9.77288	10.1793	10.7128	11.9328	12.1216	8.38127	8.79314	15.2558	9.27976	10.4184	9.85038	8.2693
Q9BYD1	23.519	20.4689	12.7242	22.5239	14.4022	25.4886	13.6199	15.1645	16.6038	14.4306	15.7482	14.7694	13.3384	15.583	13.4844	12.1402	9.07228	11.7027	14.362	13.5827
Q9BYD2	23.4742	20.2926	15.8594	18.4721	20.7911	25.0115	20.5097	15.4767	18.3933	16.5543	19.4541	9.32505	23.1538	14.2706	12.1193	15.3885	15.2494	18.3477	16.4731	18.1329
Q9BYD6	13.8511	8.49693	6.13039	6.99778	5.71588	6.45745	2.45201	1.80555	6.8714	4.16116	15.3797	11.8055	9.56176	6.86408	10.8517	8.74826	7.01594	5.56953	10.5434	5.30989
Q9BYN0	29.3963	34.9912	30.1584	26.2175	14.1375	16.2237	23.9315	23.2135	20.1881	26.405	29.4632	18.2672	16.0666	17.0646	20.7294	19.8695	55.6907	27.0111	17.313	14.8128
Q9BYT8	27.0697	26.6838	26.5744	19.4561	16.8352	22.6182	22.6372	21.1409	19.8568	18.0694	19.47	22.9787	22.7036	13.9191	15.0135	15.4551	21.4981	14.6163	17.6387	14.9051
Q9BZE1	13.1891	14.0291	24.9148	22.322	16.2492	7.46959	6.3421	6.57116	7.53062	2.24837	14.6533	14.1803	15.7904	7.40431	8.62713	12.7412	11.3084	11.4607	11.7582	12.1308
Q9BZE4	37.4482	27.4083	31.0257	25.9646	41.0351	46.5566	30.5626	42.5231	42.4463	45.4961	35.1481	14.7325	37.5166	31.8676	20.7109	28.0512	28.3409	34.9403	32.0677	34.1308
Q9BZG1	22.7913	9.74113	8.83375	7.72198	11.2449	13.6995	14.7231	8.08564	23.421	19.6645	19.2346	15.7132	15.4193	15.8949	19.8397	12.9981	16.686	14.2782	15.3155	16.7698
Q9BZX2	14.9751	21.1447	18.0917	20.0437	27.1889	25.8928	15.0116	26.244	24.5468	31.6284	20.7766	21.3082	22.8218	20.3713	15.912	22.8302	21.1992	18.8236	29.7962	22.4152
Q9BZZ5	53.9196	46.8871	34.791	38.931	20.3141	54.877	39.0722	46.9271	33.9629	24.3763	38.1218	37.4597	33.8903	33.999	30.4234	32.4427	35.0635	34.1375	38.2628	34.5166
Q9C005	22.1401	9.54497	8.54477	11.1015	8.54244	12.9563	17.1176	3.81966	11.7149	8.44995	37.8439	29.4522	33.5629	30.3292	29.3765	29.4253	19.7816	53.5286	33.925	35.7007
Q9C0C2	14.2131	12.6674	13.9989	11.6263	19.2678	13.9072	11.016	19.4828	10.6494	9.81576	16.3775	15.857	7.8204	7.64762	12.2712	17.4356	9.68453	10.2175	12.3284	10.0386
Q9GZL7	27.691	30.2714	24.8255	20.165	19.5941	34.2241	21.5066	24.2472	27.0674	34.9718	12.3483	18.5804	26.3414	16.4555	14.8587	17.9936	21.3729	15.6948	16.596	15.4924
Q9GZR7	13.7792	8.25177	4.91064	8.67444	3.91716	11.6953	14.9423	5.23118	4.38766	7.84213	7.30429	6.51146	10.5831	6.74285	6.15997	8.09349	8.46392	5.50835	6.62688	6.529
Q9GZS3	30.9476	36.523	25.3829	44.2916	23.4062	24.2657	28.7488	16.2666	25.4758	18.945	26.8024	34.9784	40.5096	22.4064	32.4333	45.645	34.2913	30.5361	35.2823	28.719
Q9GZT3	43.0947	86.6588	59.3674	41.4961	51.6523	53.7295	43.0798	38.2961	51.3934	26.9901	91.5235	72.928	125.41	76.2706	78.2853	38.6883	49.4762	90.8373	85.8033	81.4708
Q9GZT8	20.2299	23.1173	23.2093	28.4304	24.9118	18.3213	14.3718	8.54304	15.86	31.0205	9.79255	17.1646	14.9559	12.2086	12.2835	10.6857	12.5992	8.83536	10.8766	11.8042
Q9GZZ1	15.548	19.9854	14.4093	19.7221	16.4458	29.3284	24.7897	31.7517	22.8106	36.0531	26.4499	26.9729	28.0845	31.2576	27.2589	30.4547	25.521	38.6895	28.2068	27.8118
Q9H074	14.4145	17.9229	16.8375	19.4764	11.1045	28.8455	37.6117	23.3723	29.3844	26.6687	25.223	17.7306	39.9618	18.8878	20.4362	12.6018	13.556	12.75	25.121	19.7044
Q9H078	20.1541	10.7131	11.3044	15.1504	5.43972	20.8638	11.1454	10.9534	11.88	10.7925	16.822	14.6009	10.9939	13.7042	15.9723	16.5472	14.1161	16.478	18.0601	13.2742
Q9H0A0	27.4333	24.737	19.5571	19.0267	16.4402	22.5216	19.418	20.8061	18.1223	15.8516	31.8871	19.2152	24.6956	27.3323	24.1422	31.5615	21.4608	25.3108	30.8201	25.3141
Q9H0C8	20.0385	21.0282	13.3204	26.7261	17.2036	21.3393	5.26434	11.9296	6.54109	13.9071	12.6066	12.7239	21.1349	17.1826	16.1819	16.7552	14.9556	15.326	18.7449	14.748
Q9H0D6	22.6102	13.8129	14.3419	20.0008	13.759	20.4759	16.8521	22.3405	15.2441	16.7057	21.5898	21.1865	16.9386	16.7928	15.6513	15.4108	13.8606	19.5485	16.9429	14.9792
Q9H0S4	32.4222	25.0473	18.5984	14.5693	22.4044	49.5299	33.4354	28.0709	33.7607	32.9001	32.6531	23.7026	27.1968	26.2456	30.435	29.4455	19.0868	31.6272	36.5778	29.192
Q9H0U3	32.4247	16.6043	23.2368	22.6446	27.9857	32.1501	32.581	29.8787	24.6894	32.3248	18.8483	21.222	13.2268	16.778	21.3552	27.8903	30.3826	14.0217	18.1916	21.4454
Q9H0U4	75.5653	119.899	148.543	124.223	137.841	91.5634	77.8558	101.689	89.5134	79.9787	81.06	84.3946	80.4328	92.0922	72.2049	135.959	86.1879	112.14	106.793	92.4102
Q9H1A4	14.6687	5.08364	3.39265	2.9394	7.43435	7.80929	14.8585	12.3402	10.5128	8.36305	7.55209	4.24197	6.82543	6.05918	7.36331	13.3912	5.75284	7.79101	5.228	7.52246
Q9H223	18.0915	12.808	10.6313	16.4095	14.3024	22.3305	11.669	25.44	15.0942	23.2106	10.603	7.70472	6.27396	5.9461	5.17181	7.73112	8.86549	10.1993	8.14495	7.78488
Q9H299	109.288	92.9846	218.658	80.5988	116.701	64.7524	100.178	262.271	93.7637	191.445	34.1637	36.1335	36.494	30.0409	31.5861	40.4733	57.2332	38.8734	32.1908	29.0435
Q9H2G2	16.3666	17.8389	17.9415	16.3901	10.3461	10.3181	11.9149	11.0523	9.69338	7.06353	11.4499	13.3008	8.13995	6.58261	9.52019	18.6153	12.0556	12.4572	9.77625	11.1861
Q9H2M9	18.7233	13.2322	20.7366	6.63413	10.2928	8.86615	14.3355	14.9174	16.5002	21.8595	8.72576	7.43179	8.15849	6.81566	7.62994	7.37501	10.8593	9.34376	10.752	8.46287
Q9H2P0	8.08269	9.21556	1.77553	4.94695	3.90838	2.45056	2.47722	0.817267	7.19769	1.99861	3.68267	5.46454	3.82155	3.84608	4.17598	3.99322	3.31097	4.02818	3.41655	3.21227
Q9H2U1	17.4972	11.4816	15.3755	25.8275	17.2242	9.5945	11.6506	11.7671	16.0548	7.98132	14.437	9.4732	10.0516	8.52903	12.721	14.8226	8.73494	10.0639	11.4388	10.3403
Q9H2U2	57.9918	75.4678	46.3554	63.2182	44.8325	85.4568	75.3844	50.7459	72.1314	55.9397	103.97	75.9807	80.7528	93.5523	97.4805	67.763	79.9084	48.1453	91.0331	69.4088
Q9H307	24.2818	19.3471	20.2354	21.4309	9.50922	30.0246	19.0033	24.8822	13.3946	17.0847	20.7373	21.7928	15.6365	19.6444	13.7105	13.3002	15.6535	14.0547	20.0049	18.5518
Q9H3K6	55.0415	107.678	98.6813	80.3501	85.1099	51.367	85.4466	78.8077	69.7085	91.5648	53.3761	50.7165	59.2208	53.3214	74.2016	45.3068	53.7789	59.4199	53.7756	56.8973
Q9H3N1	49.5675	62.1175	46.3555	38.9544	39.8141	70.9841	73.4835	68.2941	67.9302	64.3127	59.2186	40.3229	55.8396	57.6317	53.3326	56.9172	35.1685	34.2283	49.3374	59.9966
Q9H3P2	15.7708	15.1901	7.6767	19.5573	13.6293	15.0603	13.7053	9.44443	12.0678	12.6	7.04251	8.57419	9.94646	5.70953	5.91666	7.93617	9.67667	6.20288	7.04533	7.89605
Q9H3P7	12.4089	14.4255	12.1669	14.9411	15.449	9.33581	9.91027	13.9963	10.9258	8.27211	9.45614	8.11122	8.53307	8.44463	7.41956	9.61706	7.91783	11.5195	11.3869	8.72896
Q9H3U1	29.9713	28.0728	23.5198	25.7876	25.2169	16	21.5275	21.2955	36.4734	18.6249	29.2686	28.355	30.8586	25.2749	27.0895	27.2327	25.7787	29.6636	29.9533	21.3898
Q9H444	27.7186	16.843	19.389	18.6256	19.0515	30.9988	26.3211	20.2624	18.1681	37.6954	21.97	17.6001	9.94845	19.6263	20.1355	19.0982	17.9752	18.3374	17.2218	13.7867
Q9H488	14.3364	14.0472	25.5647	13.4828	11.0777	26.6499	21.833	12.2778	15.1382	24.025	8.92115	7.70652	5.35191	12.4942	8.86064	7.32064	5.22387	5.55608	10.488	7.38471
Q9H4A3	22.0179	17.4161	14.3825	10.9061	12.2288	13.7836	12.4119	9.81455	15.6635	12.7984	9.056	9.49044	7.50178	8.84827	8.71305	8.08272	6.31878	6.8462	8.60702	6.90086
Q9H4A4	22.6826	24.2077	23.5019	24.1359	14.9273	5.75837	14.3565	17.6209	12.6923	16.259	34.8084	52.1917	47.259	41.5415	42.2402	47.4771	60.1656	30.8315	41.1624	41.3833
Q9H4A6	29.972	49.5973	23.1773	41.9621	52.343	54.2788	48.5361	74.7901	35.0778	31.3735	20.5955	12.1145	42.5884	26.395	35.3862	23.5376	30.4431	28.752	24.4166	20.6035
Q9H4M9	27.8054	19.7119	13.5263	14.0107	17.335	9.92693	8.69176	25.8088	9.20851	8.75323	9.43226	11.211	7.84833	8.42314	10.2728	10.1777	9.34993	7.53267	10.9771	10.5475
Q9H583	12.7401	10.6975	9.65695	9.45958	11.5388	21.8964	15.2655	14.788	14.5289	13.2014	18.9294	14.9396	14.8743	11.9349	12.6497	15.6141	13.7731	20.4106	16.1626	16.7012
Q9H5Q4	14.7835	15.8729	6.5909	7.36522	11.6429	19.0927	22.0781	11.361	13.3116	12.2011	15.4226	18.821	11.7543	8.31778	11.5639	13.2106	12.8369	12.2177	16.7655	16.7036
Q9H6R4	17.8077	11.054	13.3004	14.6902	13.1656	19.4131	9.77186	8.17619	9.91429	13.4497	14.5594	11.1557	10.372	8.42829	5.15143	6.35323	8.43255	13.0379	11.3972	7.91328
Q9H6T3	15.772	18.9728	14.1621	15.0801	14.8067	13.7422	19.451	14.0316	16.2947	21.6472	15.6434	12.8878	17.7642	14.3266	19.1733	21.4617	18.6194	21.625	17.2365	16.4832
Q9H6Z4	21.0928	8.09158	13.272	9.92943	11.7899	16.6111	15.1673	14.3061	19.4723	14.1632	13.9839	11.9845	9.56187	11.8352	9.40962	10.0691	15.2746	14.8205	8.96441	14.7514
Q9H7B2	11.7066	12.0308	7.51577	9.26516	7.13356	15.7685	4.59742	10.1296	8.23144	13.0457	15.9051	6.06743	11.1587	9.55825	10.3399	10.04	4.52436	17.8465	13.995	10.8913
Q9H7E9	18.4595	20.8205	14.3783	17.1313	19.5342	17.2791	21.2415	27.3643	14.3693	20.0195	8.44847	4.37442	4.78964	11.1728	8.62864	8.89785	9.2531	10.6778	10.2083	14.2437
Q9H7Z7	24.6627	17.5111	15.0376	15.6326	24.0195	32.0517	34.7694	28.8778	27.1688	21.2913	17.0185	13.5275	16.864	17.6635	15.8339	18.2934	12.3663	13.1601	15.1747	22.6257
Q9H832	11.2652	31.2424	34	20.3733	24.5282	12.3148	19.0039	22.7517	23.323	26.1605	15.0238	19.596	23.2069	15.0925	18.3577	15.3684	17.3127	9.09461	13.9175	17.9284
Q9H845	11.3917	12.5267	13.2744	15.534	14.2576	15.9402	11.8124	6.991	3.6354	4.37515	13.2196	9.03401	9.39056	14.3719	7.65272	11.4262	9.83477	7.75858	6.94508	11.1887
Q9H8H0	14.9164	7.34968	6.07702	7.83273	12.7484	22.3067	11.805	13.6579	11.5577	10.3097	15.0217	20.0679	11.931	12.4078	11.1797	12.6697	13.0094	18.3024	10.817	15.5838
Q9H8Y5	19.2998	17.7928	12.095	13.2173	14.4115	14.1493	14.0244	16.7071	4.13374	10.3036	13.0171	13.9104	12.359	10.9382	7.50111	19.0502	6.47613	8.54996	9.46451	9.18889
Q9H910	34.0172	29.6752	21.204	22.4076	23.6514	25.7828	13.0305	24.5422	19.0849	24.446	14.9205	16.3425	27.5532	32.2743	25.9786	16.7873	27.4246	39.912	31.3072	29.2825
Q9H9A6	9.13883	8.28552	9.5391	9.92775	12.6166	4.78459	7.75615	22.4775	9.79844	11.2256	6.5745	7.94517	11.5334	8.48668	8.3384	7.57099	8.50447	8.5025	9.30389	8.14495
Q9H9B4	78.5399	69.0606	41.718	58.4984	64.6969	74.8375	33.6235	55.7769	42.1927	36.8202	98.5865	68.5208	98.5989	99.935	65.9796	83.9202	61.6692	78.0322	94.9974	94.8987
Q9H9T3	21.2935	20.5634	15.2802	14.4654	12.5427	25.835	29.3803	24.1129	16.2393	13.1993	18.8542	20.8428	19.7246	18.3692	21.3494	14.5601	16.6929	17.3575	14.8665	17.5426
Q9HAB8	4.79301	11.8395	15.6373	9.92224	15.778	9.28665	14.7324	15.8971	11.6557	9.20666	19.3981	16.4677	21.984	16.6927	17.7707	23.6821	18.7404	11.7958	19.2657	15.5372
Q9HAV4	15.9302	19.759	12.1696	14.2549	13.5753	22.3998	20.2837	15.317	18.6002	25.0606	23.9648	19.4275	22.8816	19.7696	23.5502	22.6858	22.9977	23.0234	25.5604	28.6334
Q9HAV7	37.1253	38.8101	36.3858	25.3545	31.0286	39.1353	20.9718	38.9066	34.1484	45.6911	41.0794	36.6455	28.8052	33.5685	36.1321	19.1551	31.138	18.1991	28.607	43.403
Q9HB07	51.1281	60.0774	57.6472	41.9112	37.0682	40.0989	48.667	46.6865	40.1982	43.9262	50.4429	48.1269	38.9359	46.6488	50.7794	35.9702	69.1013	43.2167	34.1523	40.3273
Q9HB40	19.0712	15.6558	9.95332	16.6557	9.70215	10.8164	13.1142	8.06476	20.0138	6.44275	18.4182	27.2316	9.33608	13.1359	10.8875	8.0132	14.6599	13.0178	11.1539	9.28462
Q9HB71	59.1397	58.6226	55.5748	43.9382	61.9389	55.7829	45.8443	58.4395	49.8083	50.1402	37.2807	28.2527	35.781	26.1023	32.6254	42.496	35.7815	30.9449	23.8205	33.8655
Q9HC07	15.4807	9.56706	8.49913	11.4404	19.2785	21.7646	15.3403	25.6308	11.0059	15.9792	18.2894	9.92991	10.7619	16.6558	9.29849	15.2886	9.32807	7.68965	8.83314	8.40041
Q9HC35	7.4404	16.159	15.826	13.8021	10.6838	11.9767	11.009	5.38965	9.49138	3.36402	15.0946	13.2449	20.335	11.5062	18.2518	15.2975	14.4814	13.1344	19.5312	13.3876
Q9HC38	26.631	43.1943	32.3138	25.4705	23.5309	24.6692	48.535	32.7351	37.2362	39.7823	40.8558	40.2137	44.6201	47.6887	39.3684	44.2495	67.2357	32.436	35.2823	32.7057
Q9HCC0	10.1244	13.3619	10.4334	12.3959	7.46455	12.4423	10.7763	19.311	10.1496	8.44078	10.0985	8.68403	10.6992	6.97631	8.21498	5.88172	4.51692	6.3335	7.23457	6.36717
Q9HCS7	14.5541	12.8412	26.9013	13.9095	6.81204	14.5037	28.2781	9.10461	8.12719	8.17652	17.7933	6.43406	9.85354	11.4498	7.74291	10.4562	9.05369	9.85494	9.21013	9.56807
Q9HD15	15.2041	20.7794	21.1968	16.4796	16.7539	12.7171	19.5728	17.6717	34.554	23.6992	17.0201	9.0281	8.39677	6.18289	12.2342	9.41504	12.7811	13.9166	9.28203	10.0505
Q9HD45	15.3378	16.7217	9.61512	22.0943	12.1159	16.5153	24.4956	18.748	24.3834	11.8529	13.8329	10.3303	10.0617	15.8258	7.89311	15.229	12.8195	12.1973	10.8724	7.47158
Q9HDC9	44.7873	24.52	38.2236	34.8056	55.5447	65.6468	67.2165	44.6792	53.3836	56.2947	58.0033	51.4917	50.3714	44.2704	47.9062	39.3768	35.3595	30.9802	34.7928	32.0349
Q9NP72	31.6944	37.4244	72.0789	38.6835	47.0849	38.7664	22.352	48.6714	44.2141	33.8529	29.4544	44.3972	31.9398	35.0727	32.3176	40.4018	18.957	31.4684	34.6563	20.1929
Q9NP79	21.3096	19.3791	16.4518	18.3468	18.6968	22.4899	18.753	14.1324	19.5764	23.7697	21.6622	23.4103	16.107	22.8419	22.079	17.4345	20.5244	25.2563	19.348	18.8465
Q9NP97	46.0997	40.3446	48.2845	71.5731	45.0476	42.8359	50.5877	45.2457	45.0018	34.9221	21.4184	26.3772	29.4935	27.5689	27.9774	32.7448	27.9426	40.8381	24.5194	28.1168
Q9NPA8	22.534	13.944	7.1809	6.41741	9.32538	32.1478	18.4455	23.7126	16.8871	12.5438	15.1237	14.6786	9.42523	8.08746	11.2935	15.8993	18.0228	13.4155	14.5697	11.6229
Q9NPD3	37.5416	47.7868	15.0543	22.8603	28.9847	32.5539	24.1496	16.3928	21.944	24.7951	15.7682	15.467	26.495	20.606	14.3963	24.9189	21.3888	20.7689	19.5436	18.9202
Q9NPF4	23.6366	20.1045	26.3052	18.8361	13.1686	15.7867	21.5922	16.0452	18.4007	21.4276	15.2623	24.1271	23.9872	15.483	16.2267	22.7289	12.7368	9.26612	16.8834	17.6175
Q9NPJ3	17.4947	17.265	12.1382	11.631	17.1524	23.7673	15.9206	20.4127	14.6805	9.61236	47.1553	39.8588	50.9061	43.9447	45.0042	29.6266	35.6258	41.6679	49.7881	49.9345
Q9NPQ8	13.5562	12.8356	26.5648	9.27861	22.789	13.3562	13.3209	9.93597	15.6711	12.9949	14.3229	7.87171	7.00704	11.7113	11.0834	10.8197	13.0778	6.93039	10.9036	7.09991
Q9NQ29	27.2973	27.4604	21.6304	16.9891	22.2351	26.8349	18.7208	16.1844	23.5994	20.2344	19.8013	14.9844	21.6681	23.1924	15.7998	9.13714	22.7485	27.363	22.7261	25.5807
Q9NQ88	15.7989	21.4244	28.4035	25.162	20.4385	13.0556	20.3062	17.4545	11.5627	17.3256	19.3534	21.6131	14.3648	13.0085	18.8908	30.9762	16.7062	14.872	17.2333	13.114
Q9NQC3	81.1331	66.2088	164.351	126.267	204.929	108.391	105.843	93.0883	74.2562	75.507	109.361	67.5637	106.369	91.6551	61.2741	132.215	54.0296	112.554	78.2114	104.782
Q9NQG5	12.9733	18.9641	7.54923	11.1846	5.70841	15.3241	16.0221	5.69165	13.5976	18.6821	13.6785	13.2013	7.86069	14.4329	15.6499	9.82673	11.091	13.2297	10.8574	13.0976
Q9NQP4	25.3321	27.6095	27.5753	35.5973	36.7811	36.4986	32.6402	42.6795	39.4724	35.7783	31.4476	24.0444	22.7296	31.4764	33.8149	30.4753	28.7782	27.0342	24.0592	31.7798
Q9NQR4	19.3215	16.0374	15.2119	14.7061	12.1356	15.5748	18.2644	21.9578	14.7751	12.6836	28.2476	28.708	22.494	19.6919	25.3815	20.5072	33.9199	17.0807	21.1313	20.9609
Q9NQW6	25.6059	20.4151	22.6042	15.0376	32.7852	6.05887	16.7164	22.6856	24.8647	17.6753	15.349	17.9679	12.5743	13.4637	12.7986	19.6736	13.3501	15.1496	6.4068	4.61973
Q9NQW7	9.66897	11.9649	16.704	9.7099	11.43	12.6384	6.78788	7.37445	4.14699	12.5629	10.435	11.0333	11.3337	10.7954	11.242	12.7627	13.1116	9.67132	11.7594	9.34122
Q9NR12	27.8659	59.0017	64.5171	43.318	138.546	51.1374	30.9545	109.478	35.147	45.0361	16.235	10.5363	24.9196	19.8581	17.3338	13.2249	13.9337	12.1844	18.8331	18.384
Q9NR30	112.675	123.502	156.314	112.752	128.491	243.091	126.79	172.302	165.757	175.82	173.639	150.094	171.142	200.948	146.265	149.72	155.268	311.539	211.271	249.608
Q9NR31	52.9733	69.9055	66.3876	48.2781	86.0012	43.4233	44.5956	48.1537	59.9254	37.8934	67.2789	76.7037	37.3373	73.6673	57.4817	96.6333	113.831	77.6229	81.7215	61.9647
Q9NR45	7.88923	11.3579	11.3368	5.54487	7.05632	14.8709	9.39055	10.0364	4.77719	7.70788	8.94697	11.3466	8.66015	12.0149	11.4106	10.2663	7.45831	8.74589	7.93877	9.08838
Q9NR46	14.245	11.856	9.97034	9.59278	6.15155	7.48391	8.80463	9.41749	5.74549	4.47306	11.9839	11.9258	9.68235	9.11765	10.3042	13.5815	4.79004	6.6228	8.64128	6.775
Q9NR50	16.5763	9.13042	18.1153	14.3534	18.8471	13.9175	13.8816	12.5946	21.6894	11.2212	15.2791	7.60972	14.3565	18.3348	17.2417	13.9019	11.1704	14.8103	17.1663	17.9249
Q9NRF9	23.3958	44.6548	14.4674	29.3709	30.0375	33.7474	39.757	23.2224	18.163	21.0967	26.9873	28.4083	28.892	25.5038	40.8754	22.9587	29.8753	21.1263	24.3496	28.8495
Q9NRG9	41.6891	65.5541	28.7634	28.9288	26.9057	37.1146	30.0823	37.1276	21.4141	23.102	23.2227	21.7062	16.0833	24.3859	20.2006	25.5051	32.2407	13.8149	22.9538	21.771
Q9NRN7	8.85843	9.02786	14.9327	16.2705	16.6507	9.46282	12.8969	15.2438	12.5565	17.3603	18.4081	14.4926	14.2601	22.7784	20.3272	18.7054	15.6171	15.4035	16.1469	18.038
Q9NRV9	29.2438	42.8279	42.1977	39.5836	46.6979	34.1895	28.672	24.3791	30.5698	22.5542	22.979	17.4364	16.813	20.9072	20.0025	30.9443	22.1783	16.8674	31.2411	25.657
Q9NRX2	14.9111	15.3909	15.3417	11.2645	14.2644	16.5222	20.5157	12.2295	14.4037	12.7054	20.9614	7.99174	14.574	10.1146	11.9258	10.9473	8.04316	11.9406	16.2925	15.6617
Q9NRX4	7.31043	15.6386	8.09779	15.0952	7.24884	4.35112	15.9896	14.8745	9.40172	9.14574	22.4783	10.6852	11.2887	15.5514	22.5864	24.1715	6.8121	7.29268	6.55504	6.76147
Q9NS69	20.5738	32.9055	44.6877	43.7757	24.692	82.3204	40.5196	39.8596	19.2277	15.1324	19.7416	17.3686	16.8083	20.5736	15.3411	14.7151	9.83032	15.295	17.8193	18.0278
Q9NSD9	36.4109	49.0271	70.8699	39.0867	51.0844	39.0457	46.117	51.7216	44.2282	54.1267	62.3107	54.386	61.4019	71.523	54.077	74.8764	62.3827	55.0755	67.364	71.5743
Q9NSE4	32.5134	48.9593	35.7822	29.8705	23.6581	20.7296	25.1102	20.5858	19.7902	18.0987	27.0958	42.1378	34.1308	30.0872	32.524	20.2638	36.077	21.8571	30.4154	28.4872
Q9NT62	7.28602	11.3466	18.6507	12.4693	10.5503	8.18276	17.332	12.273	4.25454	13.8686	9.94488	10.8037	5.0024	5.82458	10.3324	10.1841	7.78107	10.3455	11.6851	12.7394
Q9NTJ3	26.2052	21.0178	18.1033	30.1896	24.034	26.232	34.6189	29.2944	25.4824	26.5752	28.2218	28.6153	27.994	25.7468	27.9387	20.4525	26.178	25.3737	20.7586	24.427
Q9NTJ5	18.6307	11.6703	9.62857	6.38411	11.4196	18.4462	7.80712	13.9042	5.8032	10.8272	19.2167	9.0972	11.0946	14.9684	11.1516	11.3695	6.74475	9.13975	12.822	10.949
Q9NTK5	79.2599	72.7974	99.6713	67.2401	70.9592	47.6098	55.2639	86.8589	85.2948	74.2485	55.628	55.8535	75.6545	67.9472	58.4647	77.0166	61.5142	60.2643	66.5701	52.6749
Q9NTX5	14.3459	11.4562	9.0786	7.97879	5.20784	9.76522	18.6002	16.544	7.65569	9.82032	10.2185	6.18926	7.84991	8.50777	11.9855	7.06615	6.33787	7.95407	7.14918	10.2163
Q9NTZ6	22.56	21.7577	18.9884	20.0003	17.2138	32.5219	18.7821	21.7365	21.6512	23.3569	23.1354	20.5929	22.109	20.233	21.8805	18.1036	19.0746	23.362	24.5721	27.0588
Q9NU22	7.31789	7.67933	4.83615	4.08864	4.83206	6.25197	9.28585	6.9307	6.86094	6.95994	5.36436	2.31441	3.69218	4.32017	6.26718	10.2185	8.28437	5.63397	4.35274	4.78483
Q9NUJ1	11.0659	8.08178	9.2663	12.4168	8.63643	10.1944	5.33165	5.11742	4.84331	7.73405	10.793	14.8719	7.92999	10.2582	12.568	11.5567	10.2147	11.7553	11.5096	8.51457
Q9NUQ8	26.0652	13.608	14.9745	15.3729	17.9095	27.1674	17.9036	16.0983	17.31	13.636	19.529	15.6201	12.7905	14.4146	15.5	19.7118	11.0745	21.305	15.2232	13.1585
Q9NUQ9	17.0688	34.1659	32.235	17.7337	22.1538	10.7322	17.3107	11.4967	12.681	22.5114	14.0052	13.2556	11.4945	13.5968	18.7041	13.2368	14.5255	15.5222	15.713	14.0457
Q9NVA2	22.3572	22.5767	19.2819	26.7962	20.1492	23.7539	22.68	18.7653	22.2966	23.1161	25.1507	22.137	20.4693	21.4184	16.6537	21.4442	17.8734	18.1538	24.4271	13.8941
Q9NVD7	14.1687	10.0914	8.09063	10.3228	18.7395	9.5367	7.55661	7.20533	5.86271	6.91867	8.89785	9.80744	7.35704	11.7027	8.06795	8.63021	5.64612	6.75342	11.3226	5.08823
Q9NVH1	9.26817	9.07955	18.6495	17.5228	10.4459	14.9088	13.183	9.90239	11.642	9.80827	12.3872	13.4977	15.6093	12.8842	9.66706	12.231	11.4602	7.28198	9.52515	9.63905
Q9NVI7	75.61	42.9607	36.5266	36.5634	68.0194	60.6673	28.5089	53.0189	35.6322	50.3758	51.8313	32.8078	51.9554	53.8764	37.8773	39.9236	45.1884	48.2938	52.8186	53.1785
Q9NVJ2	24.6547	34.4899	32.4368	21.7527	42.1192	20.8865	35.4399	28.6565	25.3488	23.7134	32.3859	31.5843	31.9738	26.3835	18.5598	30.4768	53.4959	17.2744	27.0846	22.619
Q9NVP1	38.0605	38.8321	16.9821	19.9185	27.4477	54.4819	27.4804	39.431	31.5486	23.5512	53.0445	29.6352	55.2799	41.5547	35.938	53.8364	40.9623	74.4856	49.9812	46.5286
Q9NVS9	10.0257	31.2398	17.5904	15.0364	7.24869	17.5184	20.5553	13.6011	10.7035	23.792	20.2888	16.6909	21.3073	10.8006	19.6781	24.6647	31.2978	16.024	21.09	20.9272
Q9NVX2	13.6898	11.5917	16.4993	14.9011	12.2001	21.2711	14.9371	18.9001	14.7314	22.2205	25.4053	19.5321	17.8095	16.5142	20.9738	13.7147	19.16	14.3902	18.9085	20.7145
Q9NW64	22.1987	16.3027	16.8021	17.4344	17.9293	17.3415	11.3663	14.1077	14.6948	16.5686	9.7603	6.56929	12.3397	9.95265	9.98818	9.38587	13.516	13.909	10.0339	15.144
Q9NW82	21.1868	26.75	12.0285	19.3076	17.2605	38.6529	24.5802	26.7763	23.3239	19.2866	18.9539	15.6592	29.7796	14.8048	16.1876	13.4879	20.0225	19.2913	15.008	16.2747
Q9NWH9	11.5071	23.5864	12.8591	13.8319	13.4751	19.733	10.1823	14.6211	11.3215	15.0347	19.3932	22.3308	16.7525	16.4923	9.72435	7.4008	21.7109	14.4678	12.3659	12.2084
Q9NWS0	19.7925	4.36595	12.8413	12.7503	9.70826	10.4008	11.9013	9.14272	12.2188	6.4561	8.30976	12.6819	12.8417	11.4009	13.6211	11.9002	11.913	9.23636	12.2005	13.1114
Q9NWX6	10.1723	22.7242	24.8818	17.7273	11.9553	20.4926	21.1938	19.1366	21.1446	17.5375	12.1831	10.8177	18.5897	14.8956	14.8723	10.9797	11.8568	10.233	9.50308	9.60845
Q9NX40	23.3894	24.6084	21.0608	14.2704	17.5605	31.9798	13.0017	20.8446	16.2827	12.1452	59.8011	13.5148	16.0948	12.2171	11.192	13.492	9.67895	6.27223	8.61251	7.41102
Q9NX55	2.90105	32.1872	18.0376	5.04078	4.74954	16.5622	17.3027	7.03039	11.1425	11.3545	11.276	14.6681	11.7156	13.9055	12.6814	12.186	13.7573	16.9461	12.7088	14.4214
Q9NX63	28.8681	28.4695	18.2046	26.9082	25.6243	32.9309	16.152	20.3994	15.1045	9.7402	32.2188	46.3568	29.8572	32.0709	22.7481	29.6332	14.9672	34.9281	29.0181	30.134
Q9NXG2	28.6805	22.3654	7.62594	5.15692	7.36604	11.48	10.5021	9.08519	12.1272	19.567	8.67284	5.06734	4.55173	10.2311	7.65033	11.3205	6.33517	6.63657	6.3048	8.98748
Q9NXH9	13.7841	16.8449	13.3192	12.3022	11.4009	28.8987	21.4145	14.7396	24.0774	22.5074	15.1944	21.1183	13.0229	15.2817	12.7002	12.2356	11.7716	12.7465	11.2721	14.2881
Q9NY12	16.0666	17.6929	19.2964	7.22749	16.5769	24.8214	10.782	22.1169	12.4822	16.4588	19.8306	7.37024	14.255	18.0405	16.8717	16.1473	10.3321	23.0016	15.7852	18.4253
Q9NY33	20.3339	12.7609	18.1804	18.7674	11.8064	9.11944	19.4725	14.2597	14.2752	16.4877	21.7796	20.9992	10.7281	15.3695	16.6428	12.2097	20.283	12.5533	11.0989	9.16425
Q9NY93	27.3364	6.00661	5.6971	13.7721	11.5061	14.7262	8.52098	17.8256	8.39396	12.1854	22.4494	15.5505	14.0953	8.79446	16.1928	11.8651	7.9417	20.9551	16.57	10.3727
Q9NYF8	40.0049	62.6301	36.6222	44.9625	34.9012	46.732	29.5737	29.809	30.461	35.2059	36.2497	45.2819	39.4786	34.5204	36.3985	61.6015	30.5404	41.9607	39.731	46.8489
Q9NYK5	23.2266	16.3075	22.3738	12.1521	14.1846	13.1488	18.0595	7.92447	9.63794	5.91003	13.1601	13.7197	12.5462	10.452	8.13916	13.9105	10.9313	10.0422	14.2864	13.9724
Q9NYL9	22.1926	23.4629	28.7671	25.5473	25.2822	21.4175	21.0917	27.9168	23.989	14.1117	21.5636	15.7072	18.1069	14.4965	13.0753	15.918	12.9172	17.4672	13.45	13.3269
Q9NYU2	24.2929	21.8213	16.9867	21.4156	12.5087	15.3696	19.7213	15.8059	19.7126	14.3835	28.1542	24.1889	21.8424	26.6048	24.3279	19.6931	19.038	24.3206	19.6726	18.5166
Q9NZ01	52.0398	13.9215	20.2845	24.017	26.9997	24.97	41.3812	39.6473	26.8753	22.2052	21.7321	14.4288	14.3427	24.8495	19.4344	34.0149	12.0555	21.9993	25.4574	22.1505
Q9NZ63	12.7875	8.63191	7.67801	12.8867	8.80333	6.83692	10.2367	8.35607	11.9545	7.8475	12.5319	9.23899	11.2388	7.35287	6.52681	12.2623	4.8757	8.90747	8.134	7.02506
Q9NZB2	10.2462	13.413	15.6906	13.6278	9.75479	15.7156	17.4442	18.7097	17.6447	12.0941	9.7379	8.36053	9.19936	10.9437	14.0383	9.74931	14.5259	9.88064	9.26036	7.24846
Q9NZH8	86.4231	38.8529	51.0883	56.368	15.1452	9.68875	15.5823	8.69682	13.0382	9.16266	88.2313	163.987	42.4811	32.9948	100.367	22.9509	235.682	140.277	26.2959	13.0604
Q9NZI8	16.6495	10.7905	22.1654	15.7715	16.6168	19.9004	19.1608	13.0822	17.5591	22.9767	12.5184	10.5999	10.4894	11.4566	11.5315	14.993	10.7138	10.0026	10.9938	16.0712
Q9NZL4	20.5517	20.765	23.4648	23.674	29.5477	48.1781	43.3194	36.7028	48.3899	38.3226	23.0853	17.6485	20.1312	17.3214	23.571	19.3943	20.6293	24.4145	19.438	23.4147
Q9NZL9	32.5089	43.7587	53.6363	41.4234	26.7863	30.1628	29.8085	21.8268	30.0902	37.268	45.5987	52.5322	47.4949	35.9819	42.4014	46.3584	70.9651	39.1776	44.1839	46.6665
Q9NZM1	29.6137	21.6335	44.2525	29.4299	55.3564	36.3812	22.2252	47.1951	34.568	32.9801	33.6095	28.1657	27.5222	35.9847	25.9527	35.8986	33.1712	27.4678	31.5201	31.818
Q9NZN3	18.2714	12.4376	9.10567	14.9163	18.8195	20.0501	8.12007	16.5382	12.5905	23.6014	14.7748	19.2108	7.9525	15.4469	15.9808	21.54	8.71223	13.1636	19.79	11.6698
Q9NZN4	26.5742	12.3399	16.2126	16.9948	46.2241	34.4969	12.888	25.5061	31.4099	18.6529	12.6704	6.60734	12.6888	9.83677	11.5099	15.5557	8.48667	12.3972	11.893	5.35559
Q9NZT1	559.967	323.496	348.103	398.107	196.86	351.188	300.771	246.155	233.216	350.127	611.184	726.894	352.047	242.526	493.925	411.1	1782.28	1125.65	302.128	223.105
Q9NZW5	12.1645	15.441	16.1878	22.2114	17.9945	30.531	17.9525	22.4231	12.8079	13.767	11.9774	7.85798	5.5892	10.1078	7.76755	11.169	9.28814	11.0431	13.1556	6.55171
Q9NZZ3	5.45424	8.07786	5.25138	3.80496	4.47137	10.7664	11.6944	3.0556	6.80595	10.9896	4.97085	7.53212	3.80517	2.70129	3.57117	7.12758	5.4674	5.08125	8.40032	4.44144
Q9P015	15.0282	12.0941	10.842	10.5972	10.172	9.79459	8.83381	9.31461	6.96167	5.95596	11.0989	5.81601	8.74056	7.33235	11.4245	7.61142	6.76709	9.04516	10.3459	10.547
Q9P035	21.0768	10.9007	15.4229	17.6319	13.5114	10.5981	5.88378	20.5012	6.61141	6.57868	12.6953	7.18853	7.42216	10.3409	7.71156	14.7166	8.05362	8.54247	16.0568	7.32592
Q9P0I2	28.6805	8.82357	5.81242	18.1202	12.0705	27.6655	16.4502	27.4625	11.4167	11.0386	14.5522	11.8288	9.69454	12.9603	13.2337	14.8786	22.4186	12.9564	12.9627	16.4744
Q9P0L0	29.0256	27.6511	24.2006	23.974	27.1236	19.8594	16.6114	24.3766	20.2046	21.0695	15.7475	10.3491	19.9912	16.536	10.9834	16.731	14.0014	13.5988	10.1203	14.0376
Q9P0M9	21.7116	21.0058	7.80181	19.5203	15.6305	21.1406	15.0974	19.0046	9.33201	11.0656	16.465	11.6367	18.3892	11.6766	13.9236	16.267	16.4687	15.666	18.3736	18.0993
Q9P0V9	14.6246	5.99765	13.5685	9.27102	13.5363	4.27364	11.6964	9.99504	7.31912	6.32758	8.24579	9.65917	9.57445	10.8828	5.15477	7.45728	5.76173	8.34708	6.19462	7.62963
Q9P258	155.907	139.301	90.6826	121.921	86.8387	102.347	79.853	154.778	112.762	165.137	78.0433	64.622	126.569	100.726	86.235	70.2514	135.6	114.826	101.177	111.674
Q9P265	7.60721	7.36883	9.11691	13.5068	7.63303	8.95901	9.8469	7.85157	3.73988	11.8436	5.65697	7.16293	7.5514	5.77382	5.56103	7.79919	5.29394	5.71775	9.06235	7.10298
Q9P287	19.9491	18.6711	9.38178	18.9168	11.882	14.1952	13.9621	18.6126	10.6053	23.0731	12.194	12.3216	11.7848	14.3285	9.73445	17.3943	9.32545	17.0445	11.0626	14.1868
Q9P289	11.7927	15.1402	14.7009	15.945	13.9868	9.67362	16.5942	15.4255	11.5902	12.84	15.1966	17.202	10.8199	15.0969	18.3631	15.9943	11.4466	15.4391	18.2574	16.7466
Q9P2E9	180.672	135.804	109.236	153.172	122.708	244.281	191.151	164.644	90.6353	70.9228	116.53	163.857	148.743	98.9713	145.198	120.633	99.0239	135.061	140.262	61.9887
Q9P2J5	36.7788	50.1322	41.6891	37.5656	42.8729	32.1748	50.2676	57.8117	40.627	33.1383	27.9823	28.3665	41.0107	34.4679	39.0572	35.5397	38.6386	37.8743	34.2314	35.5452
Q9P2R7	16.252	16.4554	12.9538	18.3477	11.11	22.1461	11.8475	13.4157	16.0574	12.9244	24.0361	15.0681	11.0969	13.4394	16.6154	11.8366	14.3258	7.85941	12.0932	10.1738
Q9UBB4	7.2319	15.1141	13.8792	17.8934	14.4373	3.88595	7.98907	12.2817	8.41445	8.41886	10.9539	12.1001	13.2081	14.5419	11.8058	11.7592	12.8157	15.6734	12.1281	10.944
Q9UBE0	20.8377	15.8569	15.6032	16.1975	10.9724	24.3557	25.0148	16.9343	21.6373	21.2479	23.2631	18.2894	17.9467	14.9652	17.6815	15.7755	15.7787	18.2974	18.391	15.1831
Q9UBI6	46.2815	35.2372	51.1139	41.4739	110.03	59.9967	22.5343	41.2888	32.2767	24.1391	29.1413	53.075	31.2175	27.0312	27.1835	23.1709	20.8595	18.6288	33.5168	23.9951
Q9UBK8	7.80086	19.3756	18.005	15.8397	14.4746	14.4009	19.4264	12.4569	20.3491	20.7179	26.3627	29.3845	14.6359	22.6552	21.7678	12.5425	9.20904	17.0286	13.901	16.2891
Q9UBM7	54.776	36.049	54.3704	36.6175	39.248	62.8746	38.1331	63.8747	29.3203	36.4369	49.7747	40.2606	22.5163	34.0393	51.8756	41.8748	18.8382	37.2562	53.6039	30.4789
Q9UBQ0	27.0309	33.4137	51.3045	36.0841	24.6138	31.6564	33.7297	27.8625	22.9015	30.4374	30.0738	38.8942	33.36	27.8757	29.2466	35.6949	27.0018	29.1152	29.3252	29.5171
Q9UBQ5	33.3	27.7724	43.5309	42.0481	41.4888	32.5113	37.3524	22.3476	23.4981	38.7561	23.2304	20.0922	31.3057	32.7029	25.8919	39.4028	27.4003	35.1989	31.0114	32.7167
Q9UBQ7	22.6295	41.5462	52.5654	22.011	28.4323	22.8913	37.1514	17.2947	26.8701	24.4686	36.7879	27.9814	24.4275	24.721	25.2911	21.0561	33.1687	17.3918	24.6086	24.9193
Q9UBR2	65.818	67.4784	41.6869	52.5892	29.5055	29.5851	36.8644	25.0021	31.0165	20.5748	34.8567	29.2618	18.5111	27.4918	27.8466	19.2844	24.1291	17.357	25.9165	13.8207
Q9UBS4	14.4603	9.9875	15.933	12.9014	14.0792	20.248	15.226	15.5692	14.4396	10.1428	29.6724	14.9896	14.0918	15.9845	15.8444	22.0072	12.8684	18.3397	13.4327	14.3498
Q9UBT2	60.3755	39.3713	41.9485	45.3573	29.5571	77.6916	60.6252	45.6578	55.8445	41.7734	35.1625	37.779	32.9781	32.3614	29.0465	32.1815	27.3185	29.3773	31.087	31.6321
Q9UBU9	14.6201	20.3885	12.7269	12.503	12.3298	12.9451	23.7082	10.3786	14.9574	17.5493	19.8733	12.4739	12.8057	10.7978	10.4625	14.4679	9.43751	11.8969	14.0854	14.0223
Q9UBV8	34.6868	25.8679	37.8157	15.8379	22.6716	15.799	17.8968	38.707	10.6455	19.8483	22.0947	20.5025	15.8429	18.6027	24.2314	10.298	13.7657	13.1231	14.9499	15.232
Q9UBW8	17.3358	16.6889	24.2482	11.562	13.122	11.6918	14.8155	14.5093	10.4085	13.8425	14.7378	9.31438	11.5551	10.122	11.0844	12.9378	11.7969	12.1854	11.7956	10.1232
Q9UDW1	66.752	19.3971	14.3842	7.01428	48.9079	58.6624	20.0314	29.9261	32.5911	38.2781	33.2571	26.1019	25.7579	31.9589	24.908	21.7597	41.0993	21.4008	23.2007	39.3496
[truncated: 150 more rows]
